# Supplementary material for: ACTB, CDKN1B, GAPDH, GRB2, RHOA and SDCBP Were Identified as Reference Genes in Neuroendocrine Lung Cancer via the nCounter Technology
Source: PubMed Central journal article supplement (PMC5089548; doi:10.1371/journal.pone.0165181), 2016-11-01

# Tumor Type

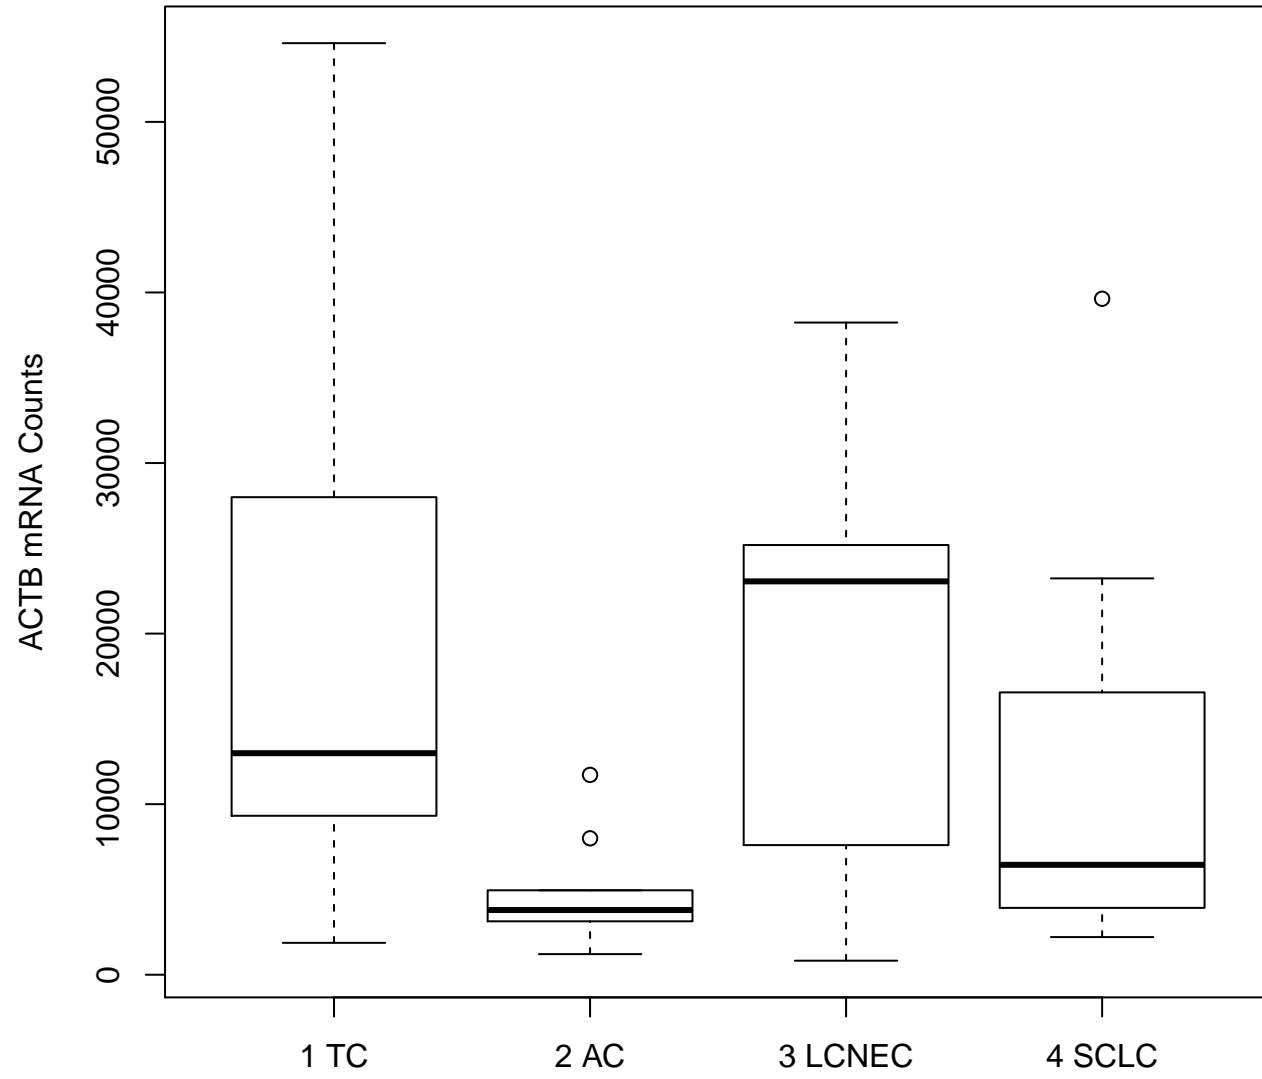

# Tumor Type

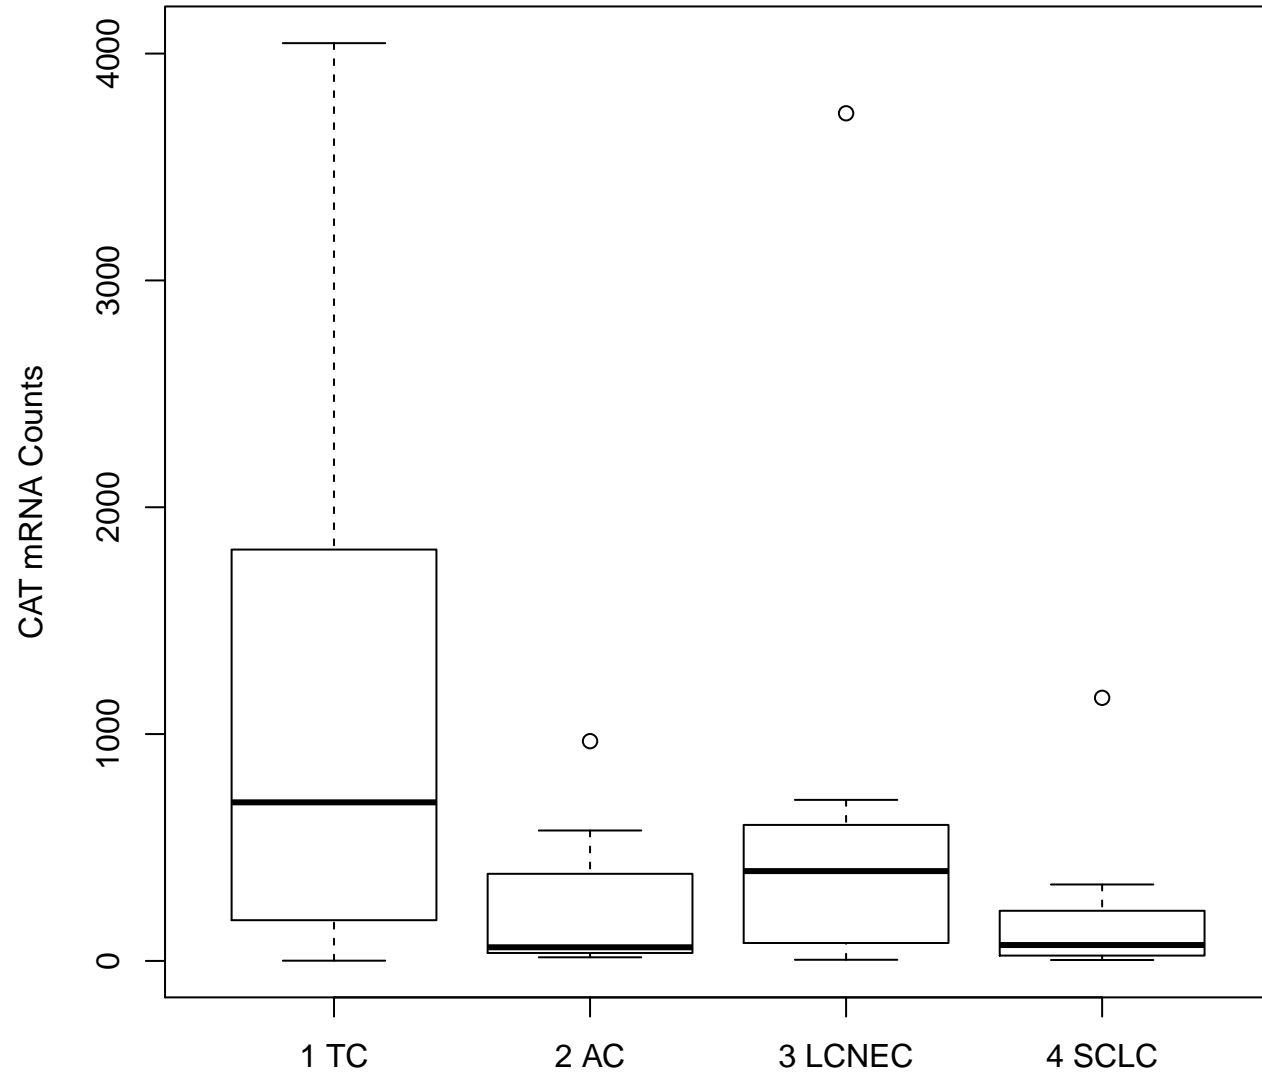

# Tumor Type

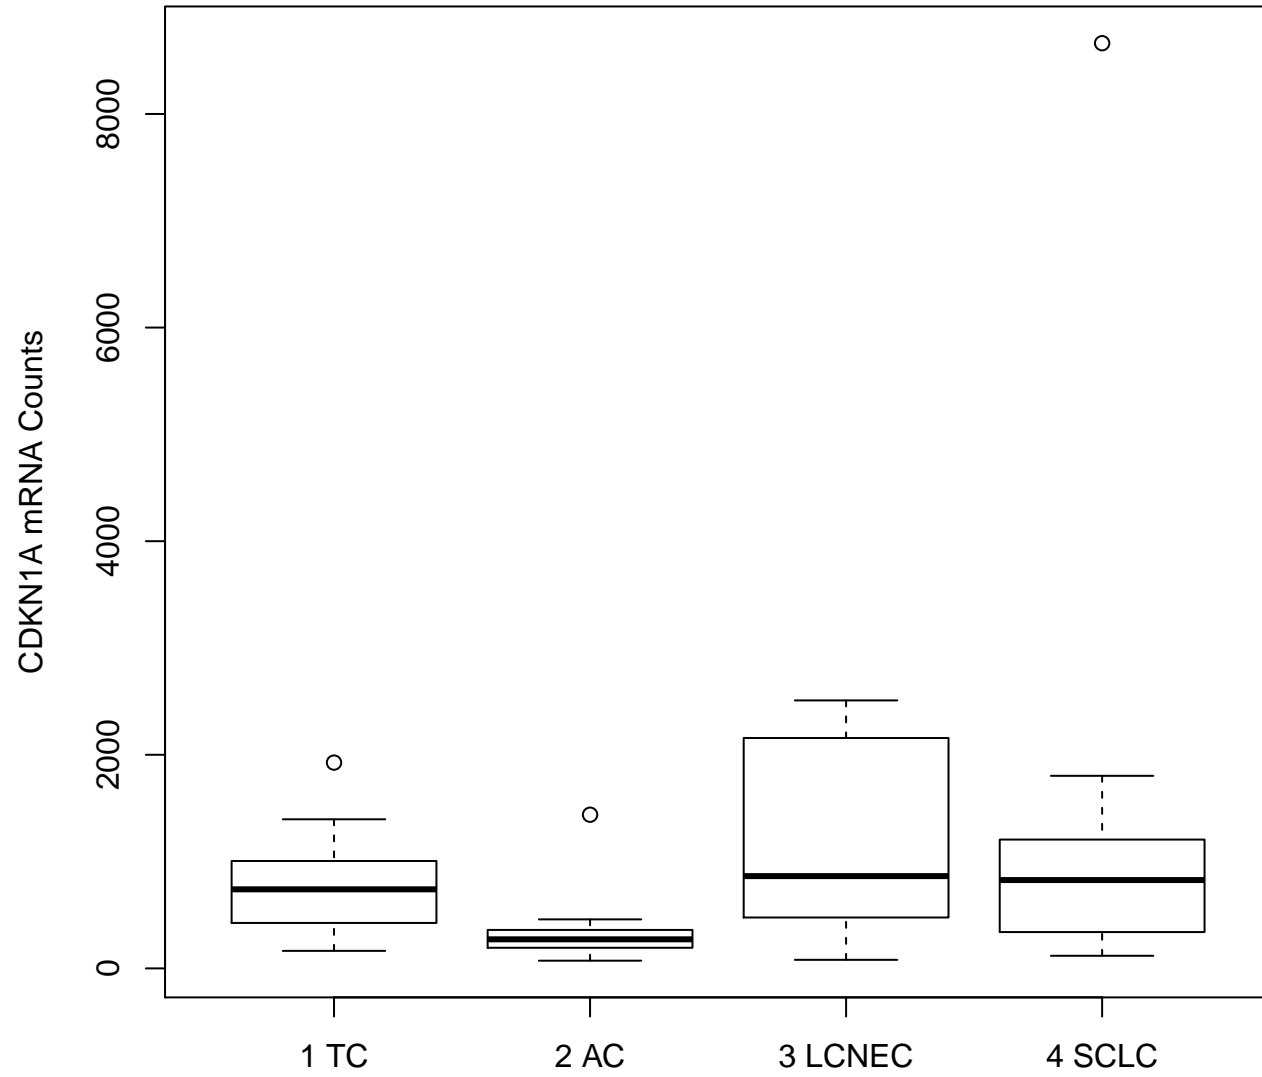

### Tumor Type

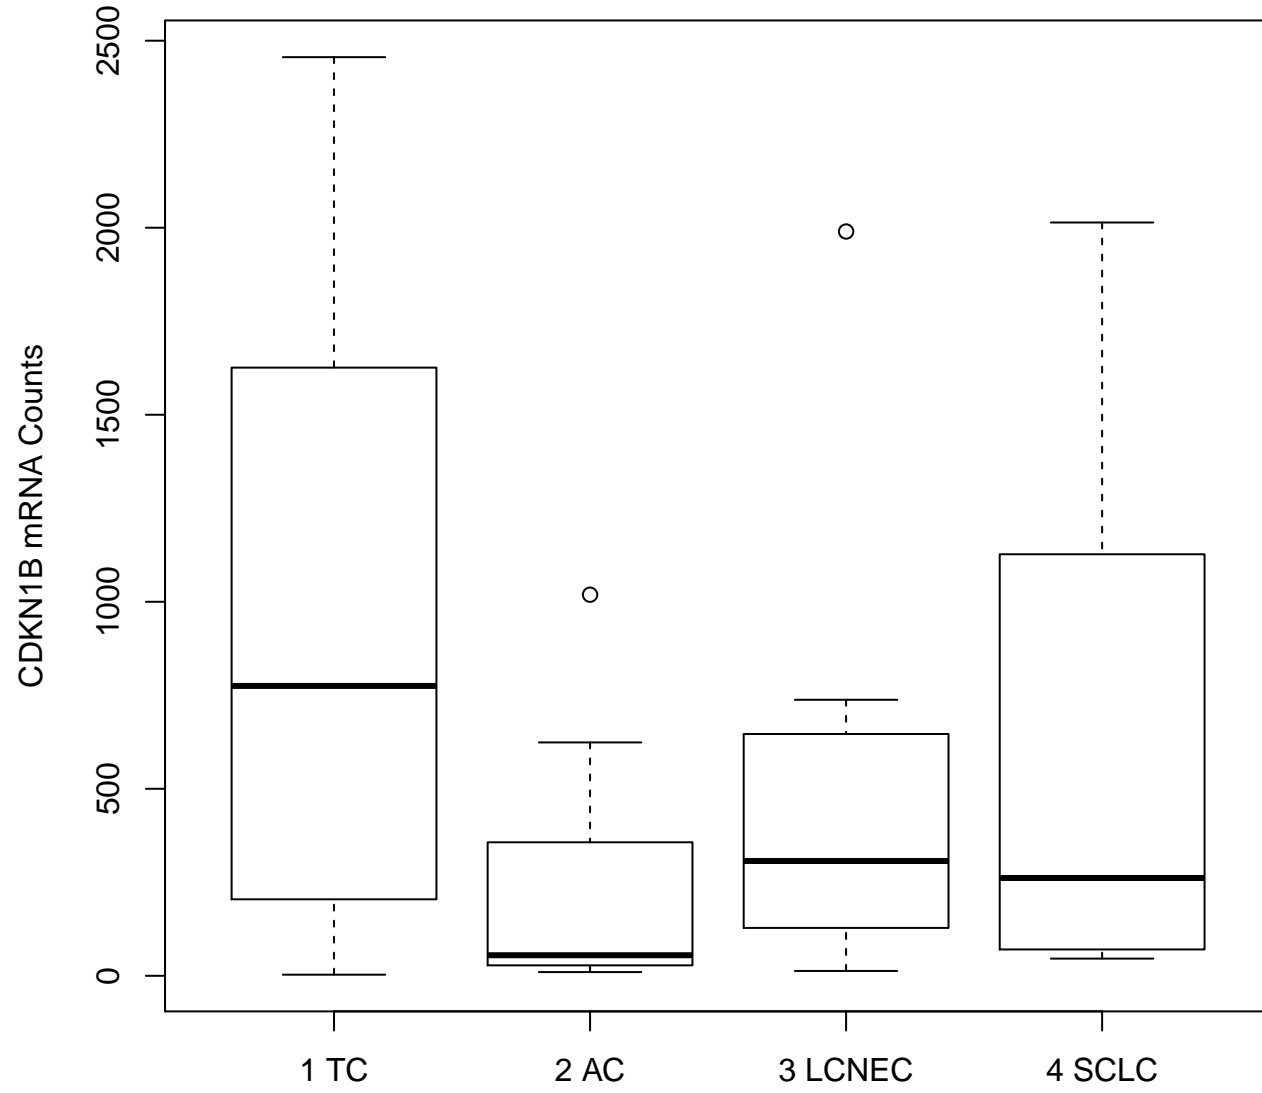

### Tumor Type

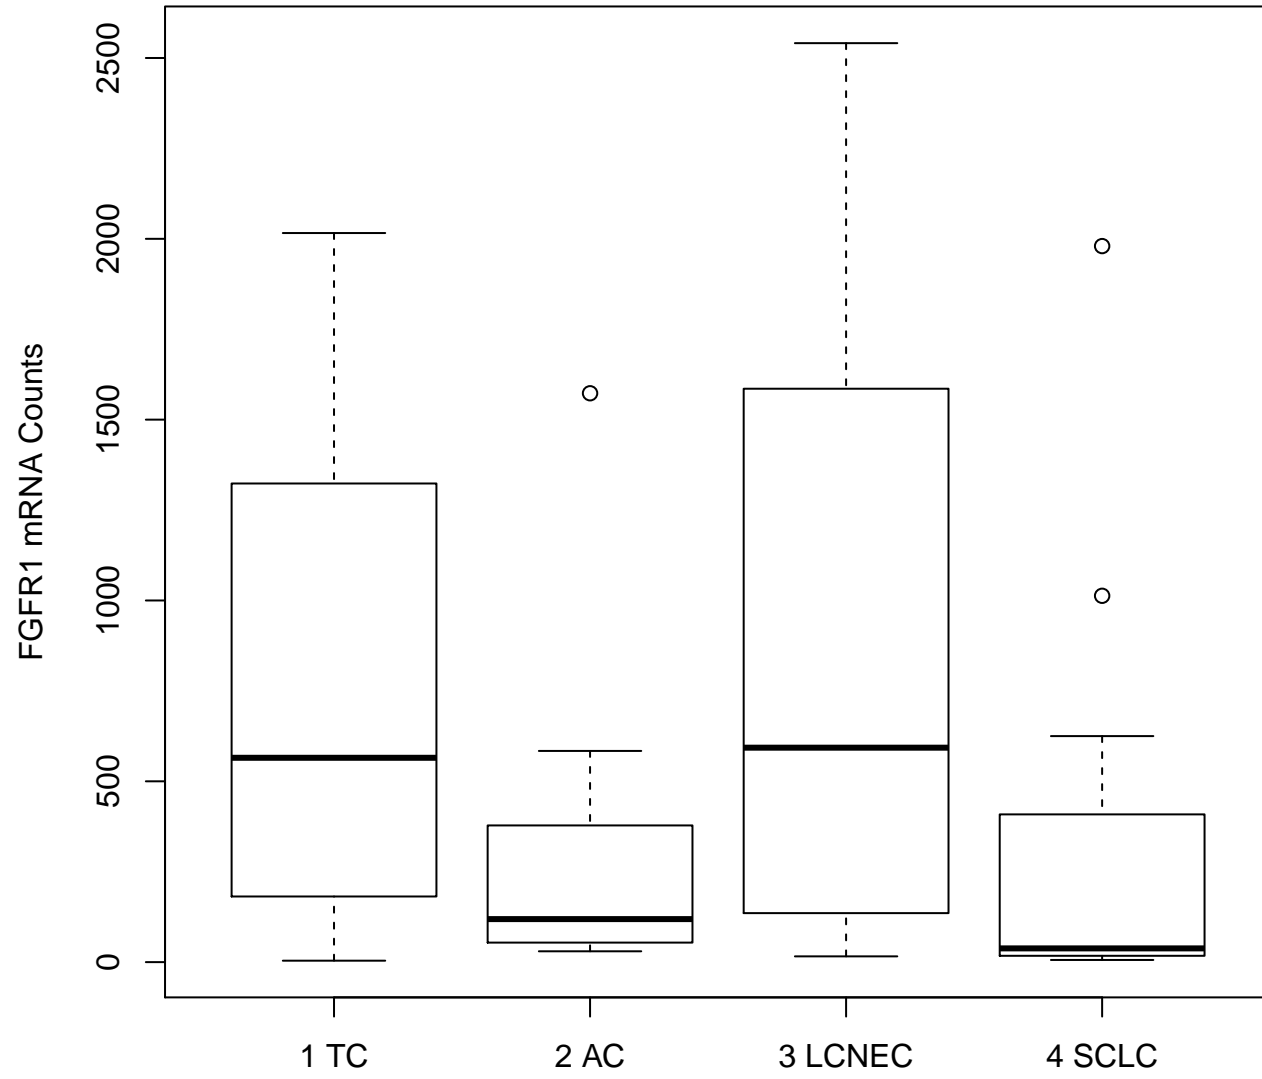

### Tumor Type

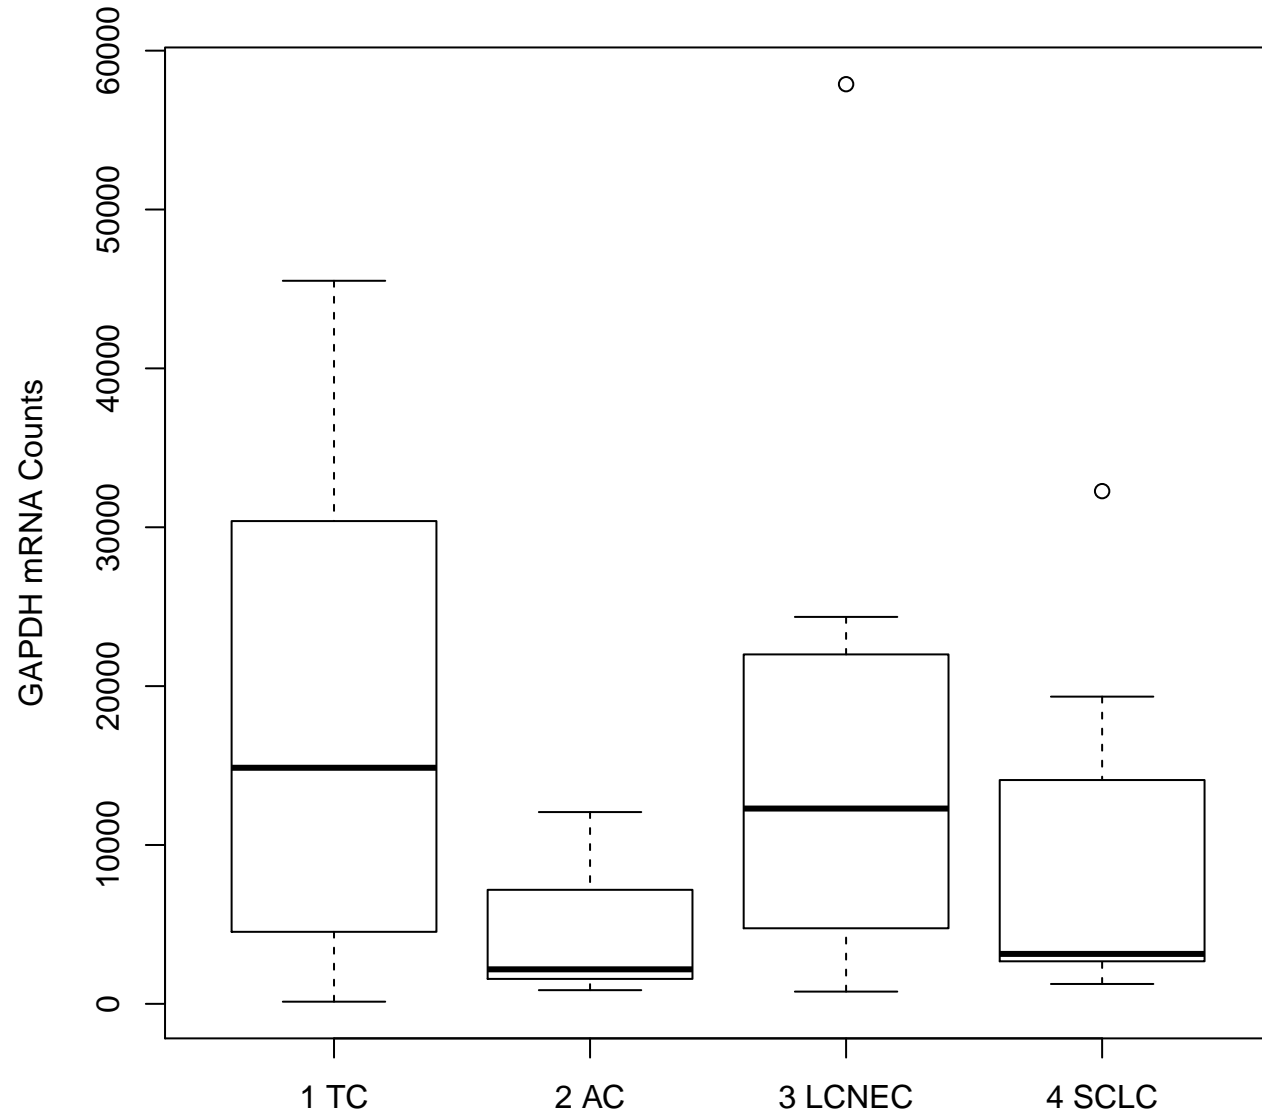

# Tumor Type

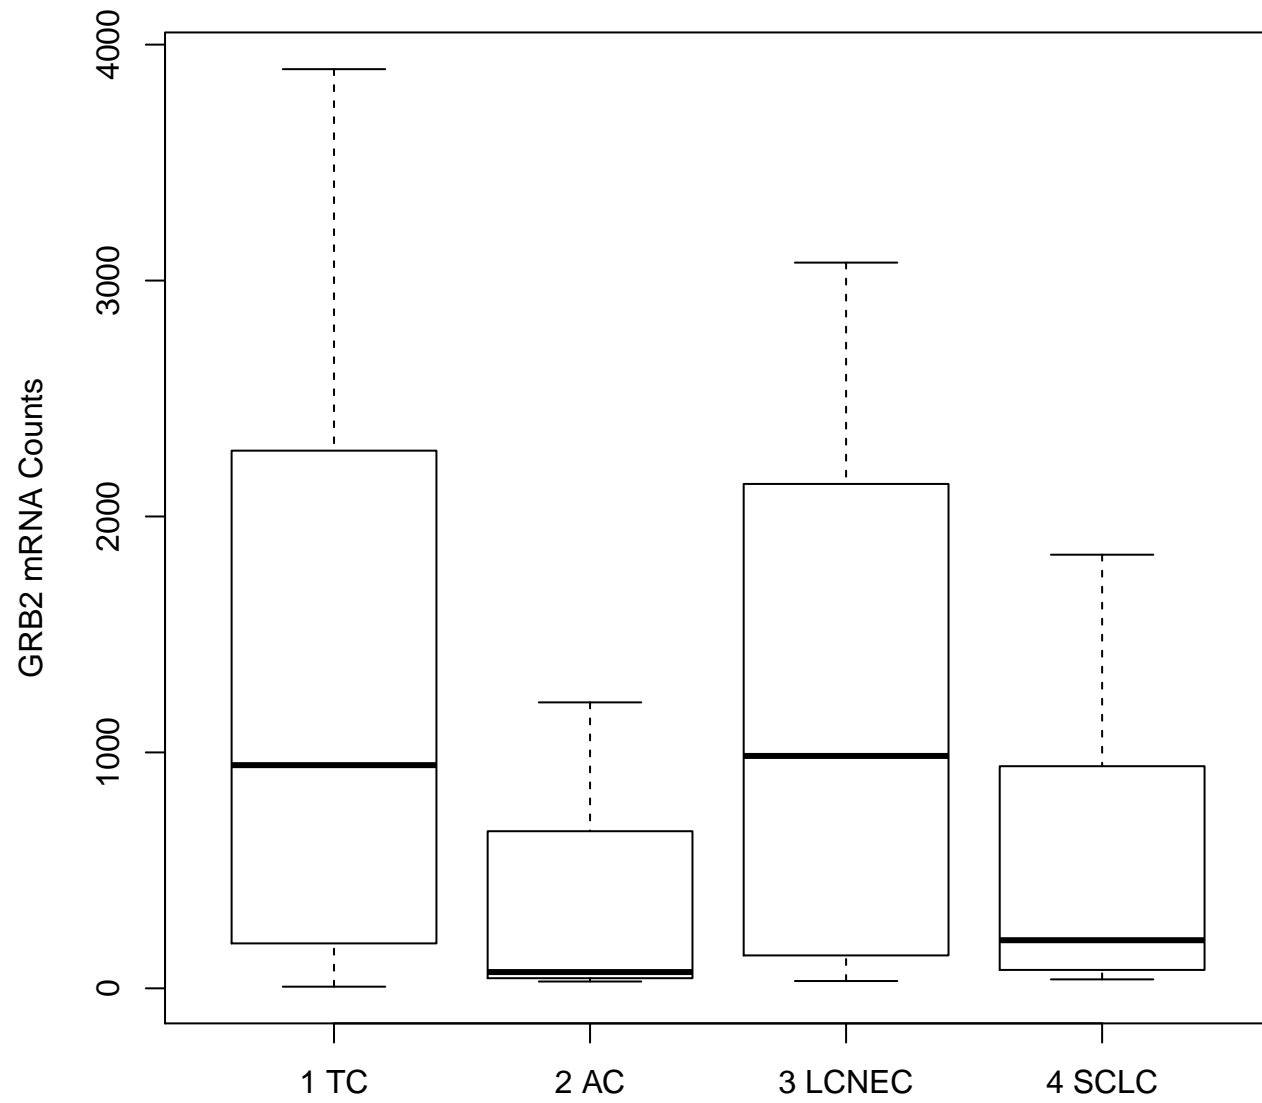

# Tumor Type

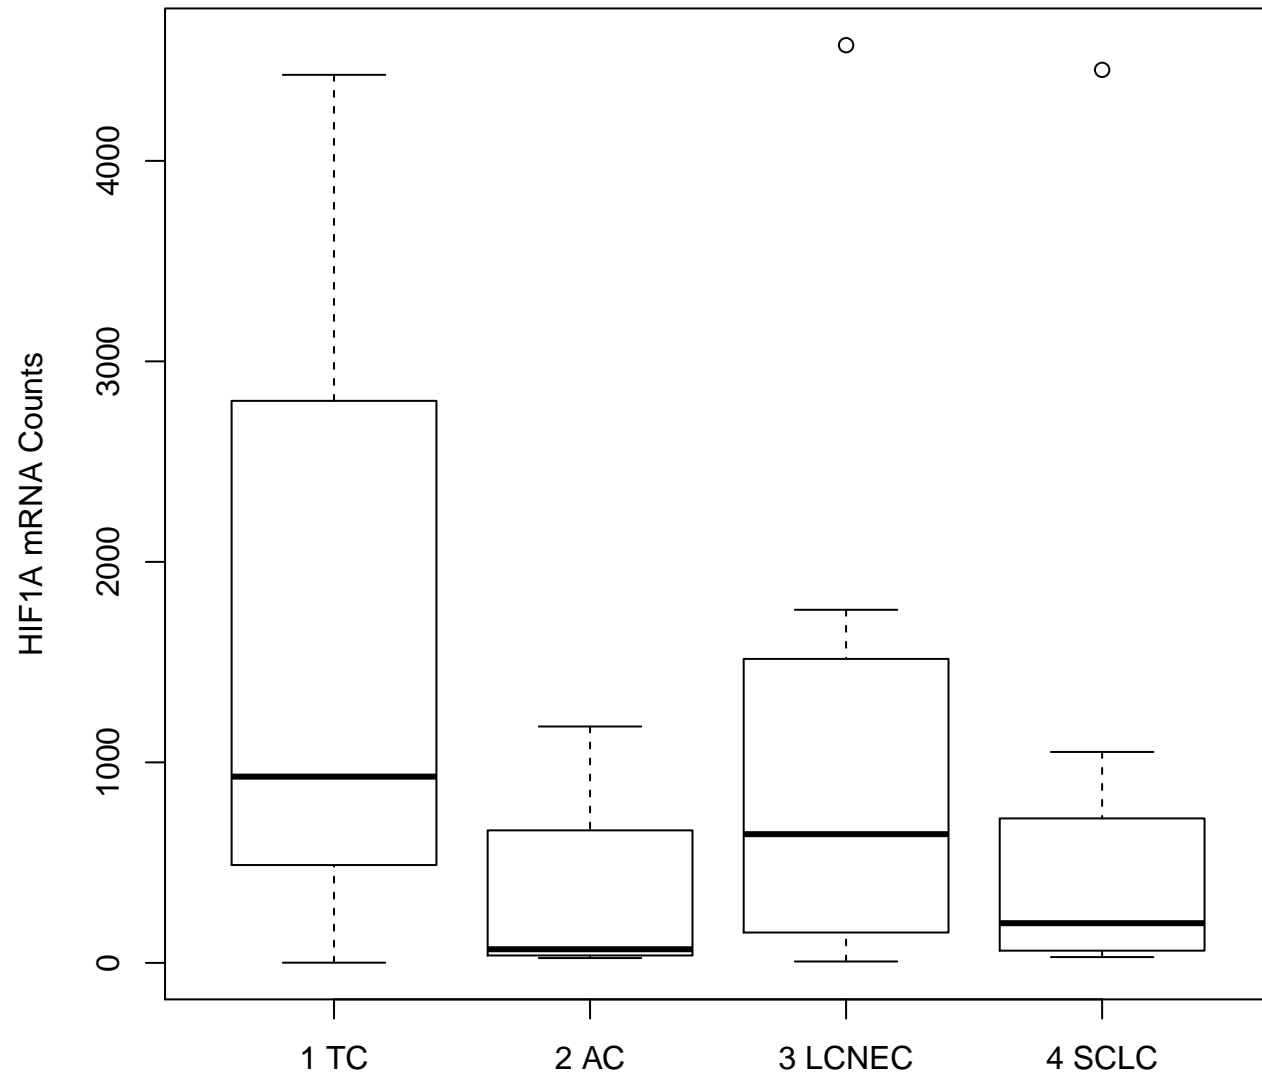



### Tumor Type

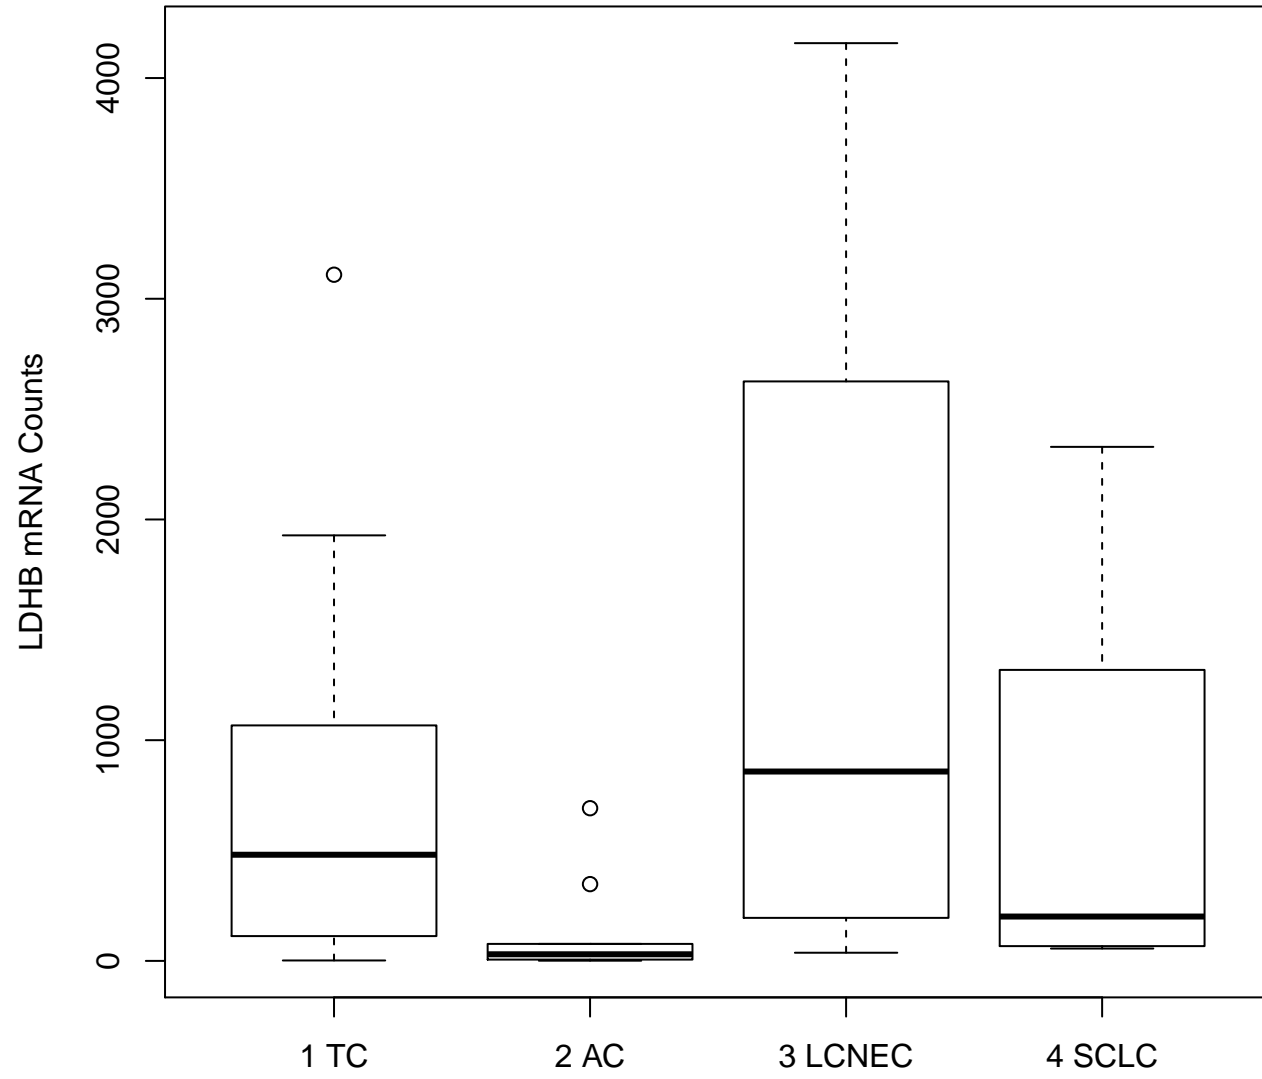

# Tumor Type

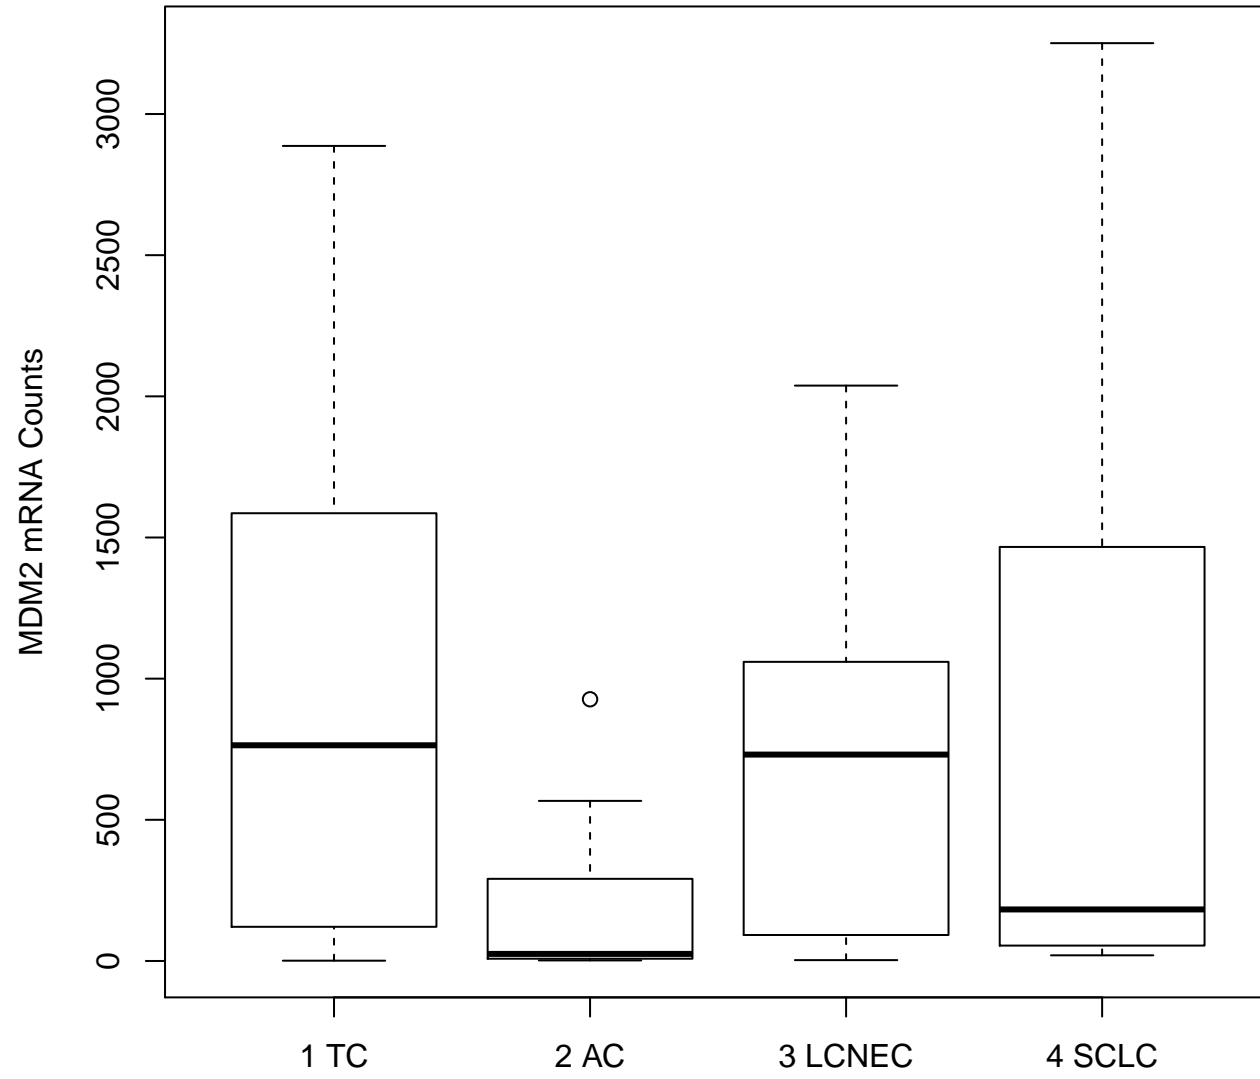

### Tumor Type

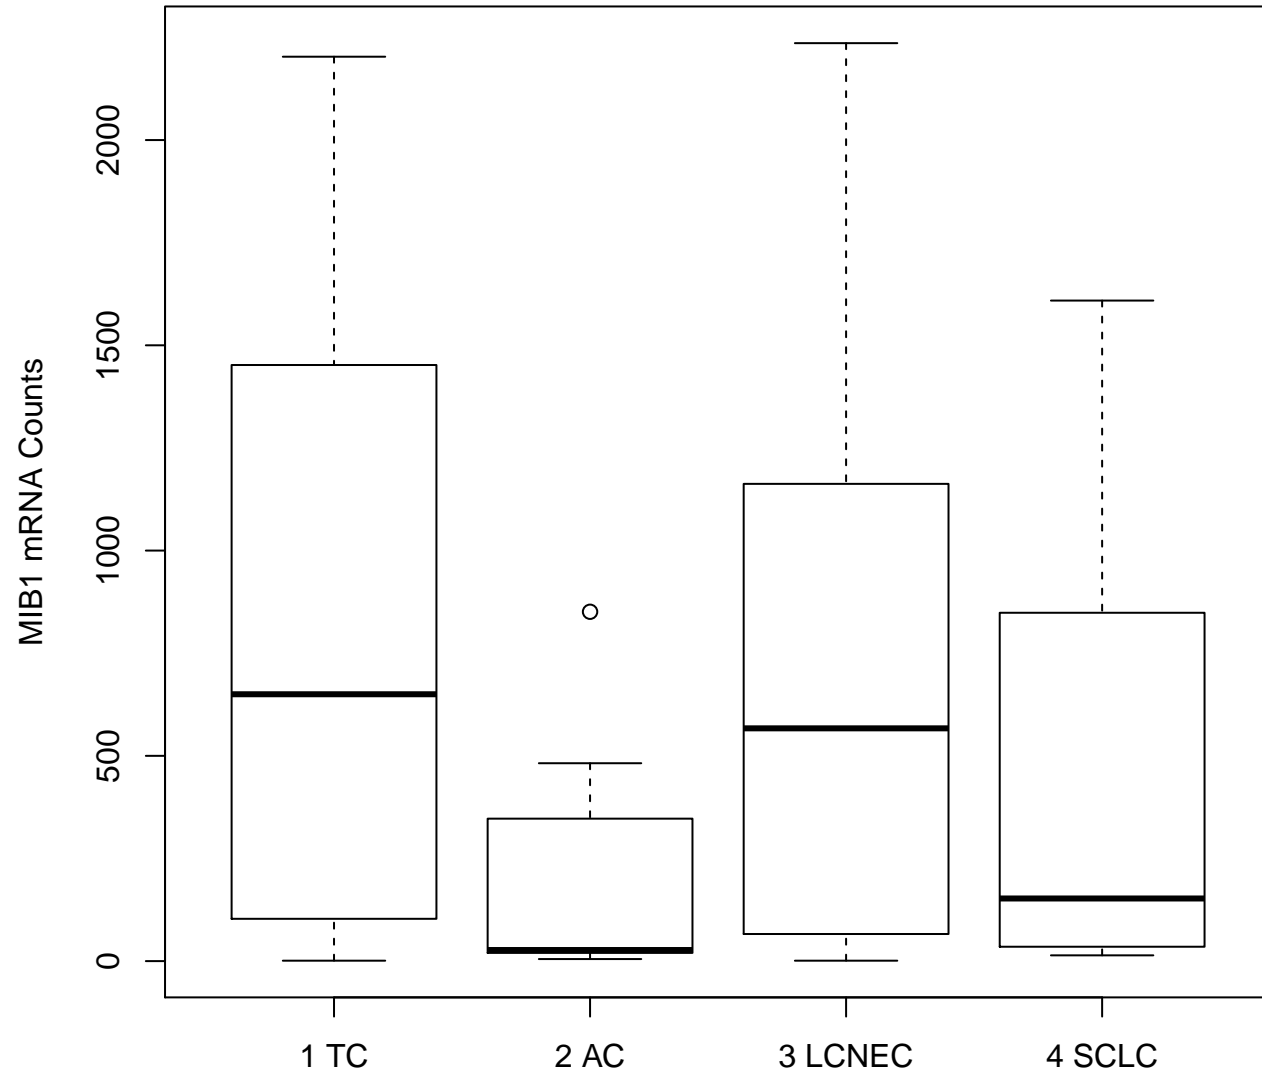

# Tumor Type

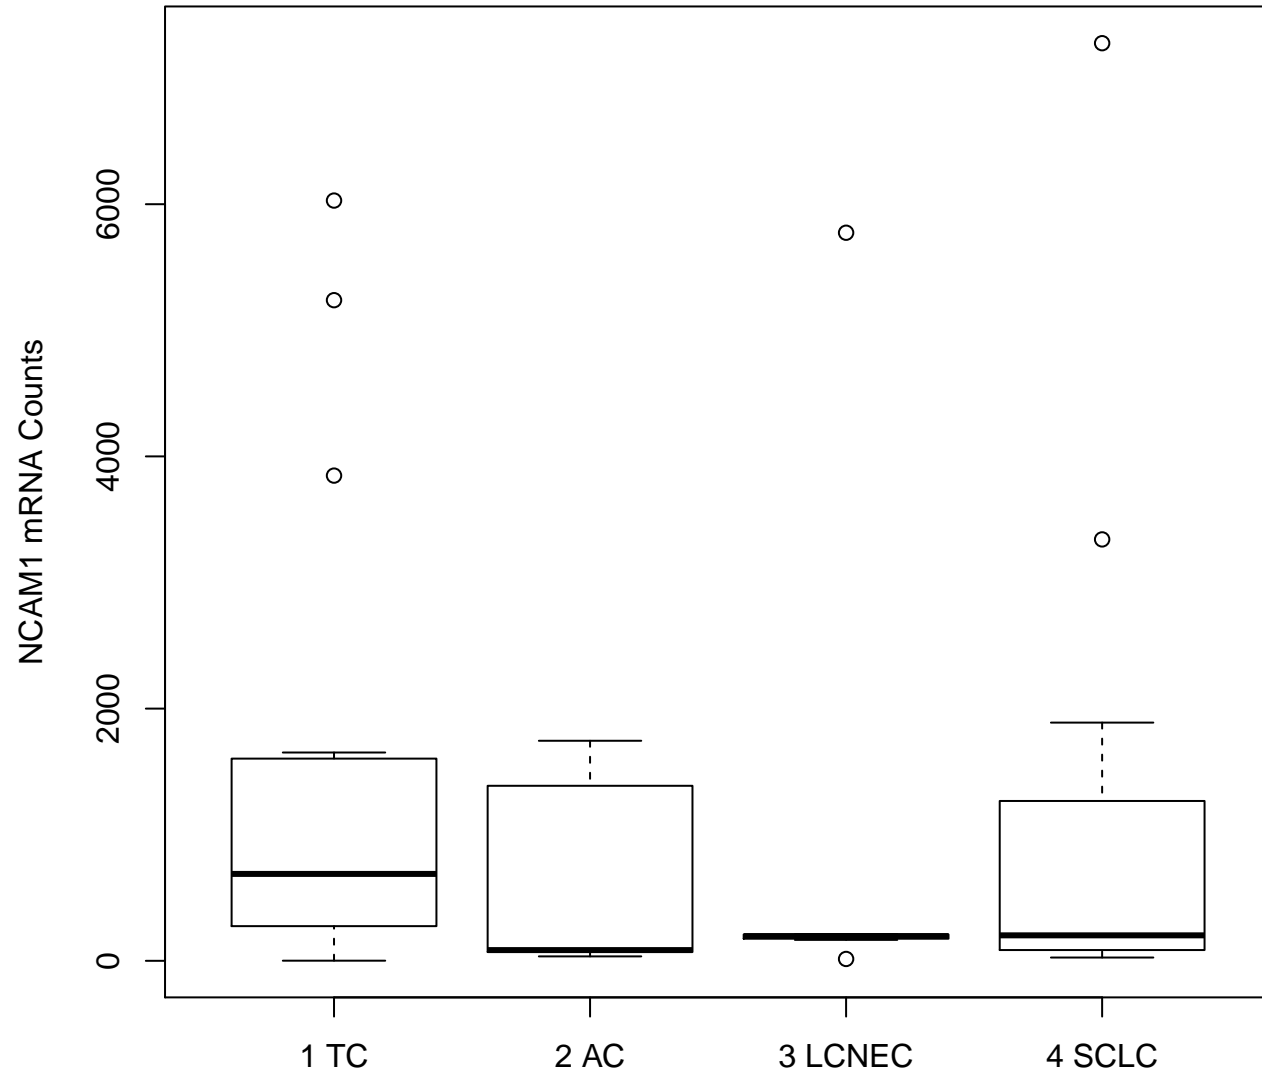

# Tumor Type

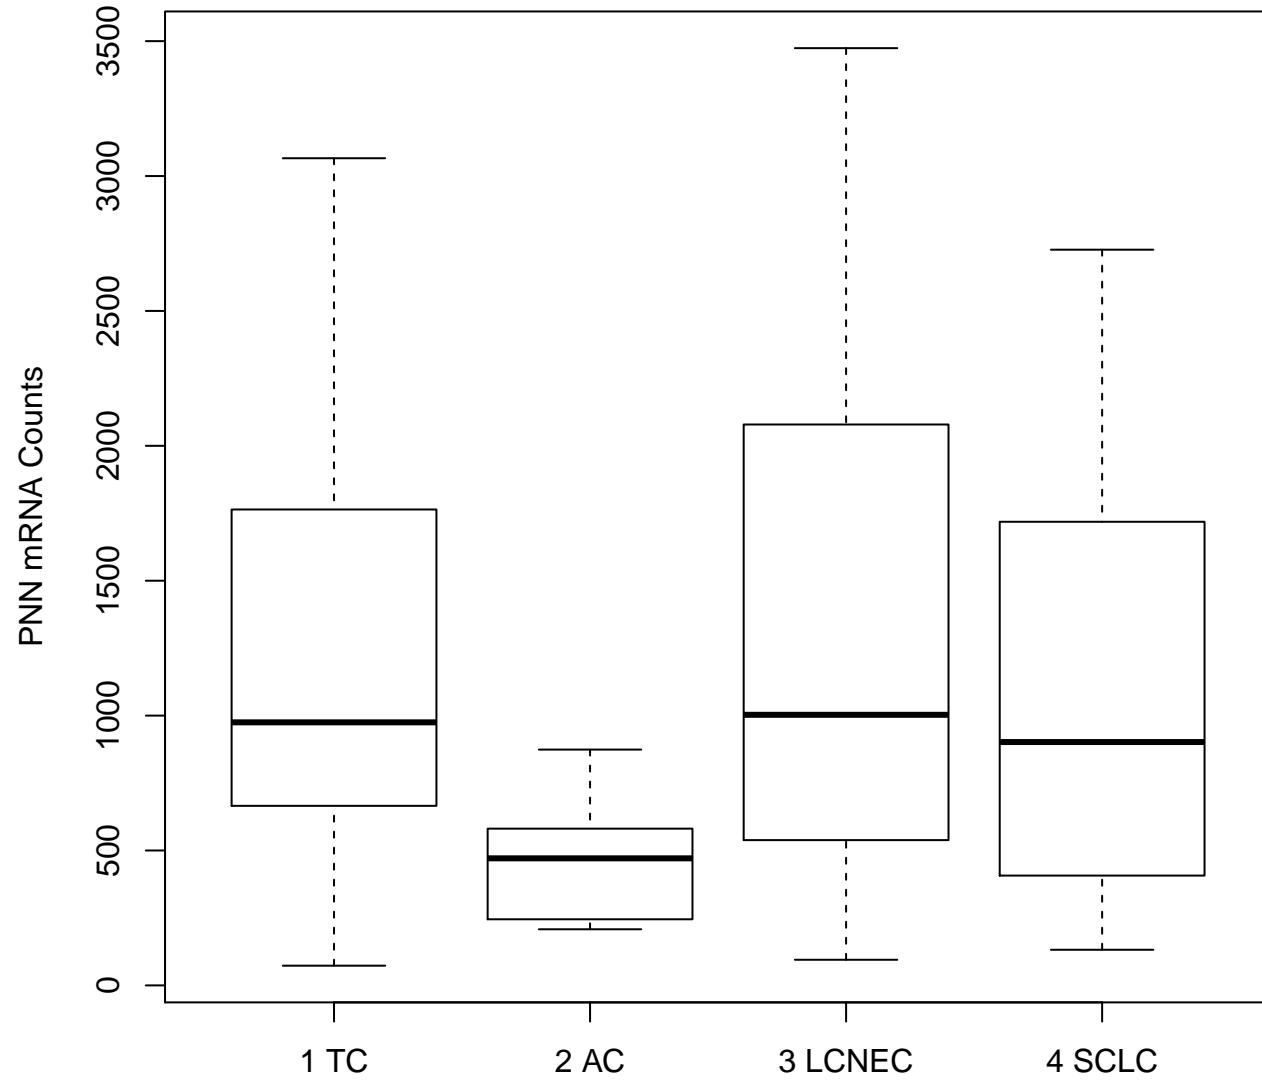

# Tumor Type

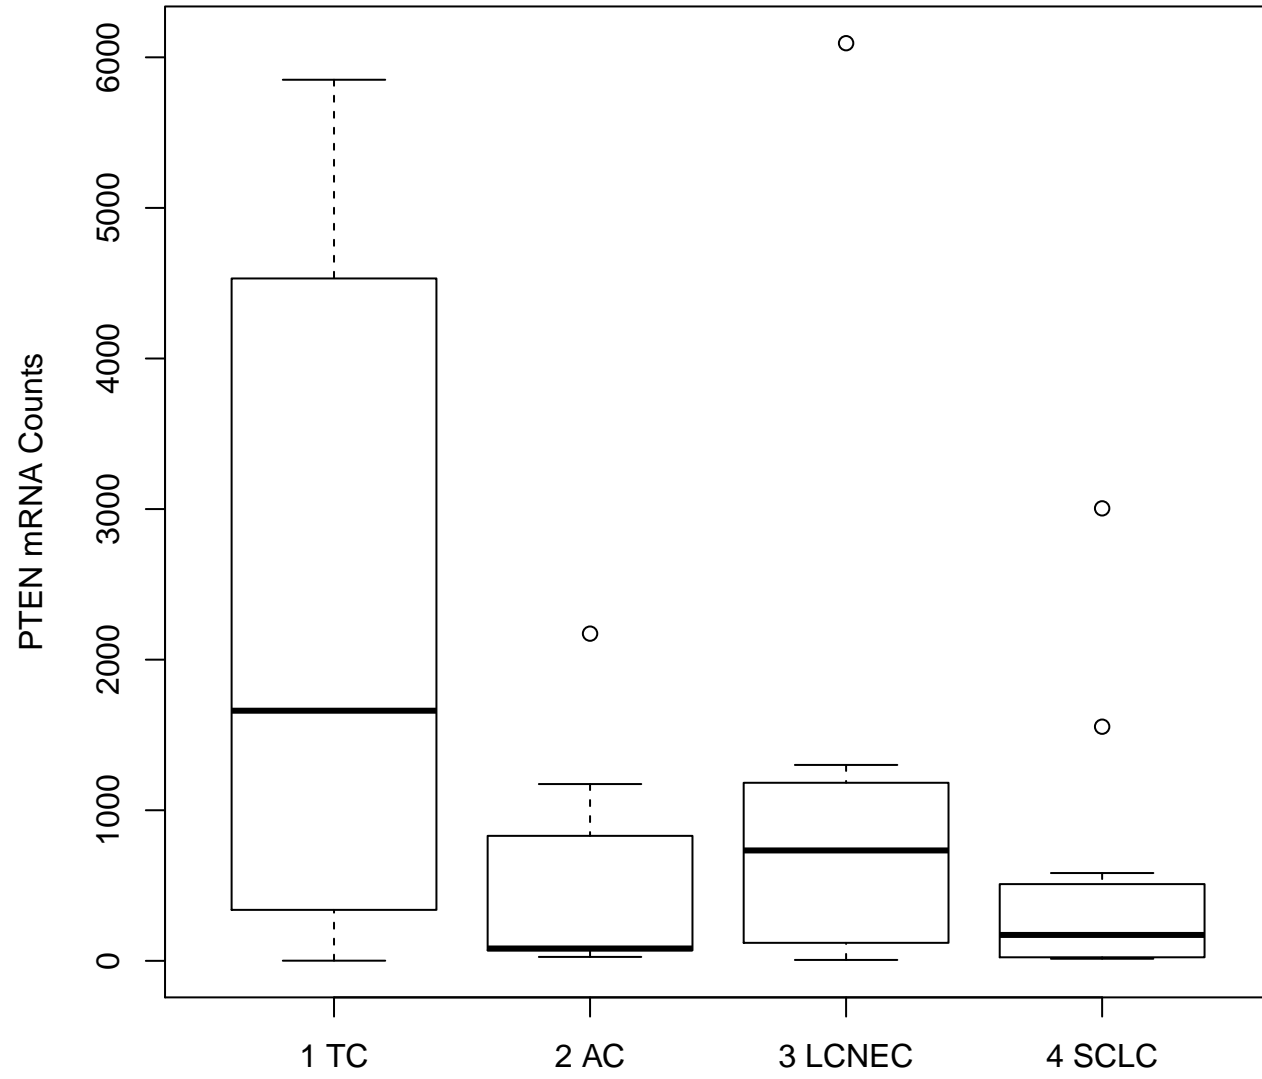

# Tumor Type

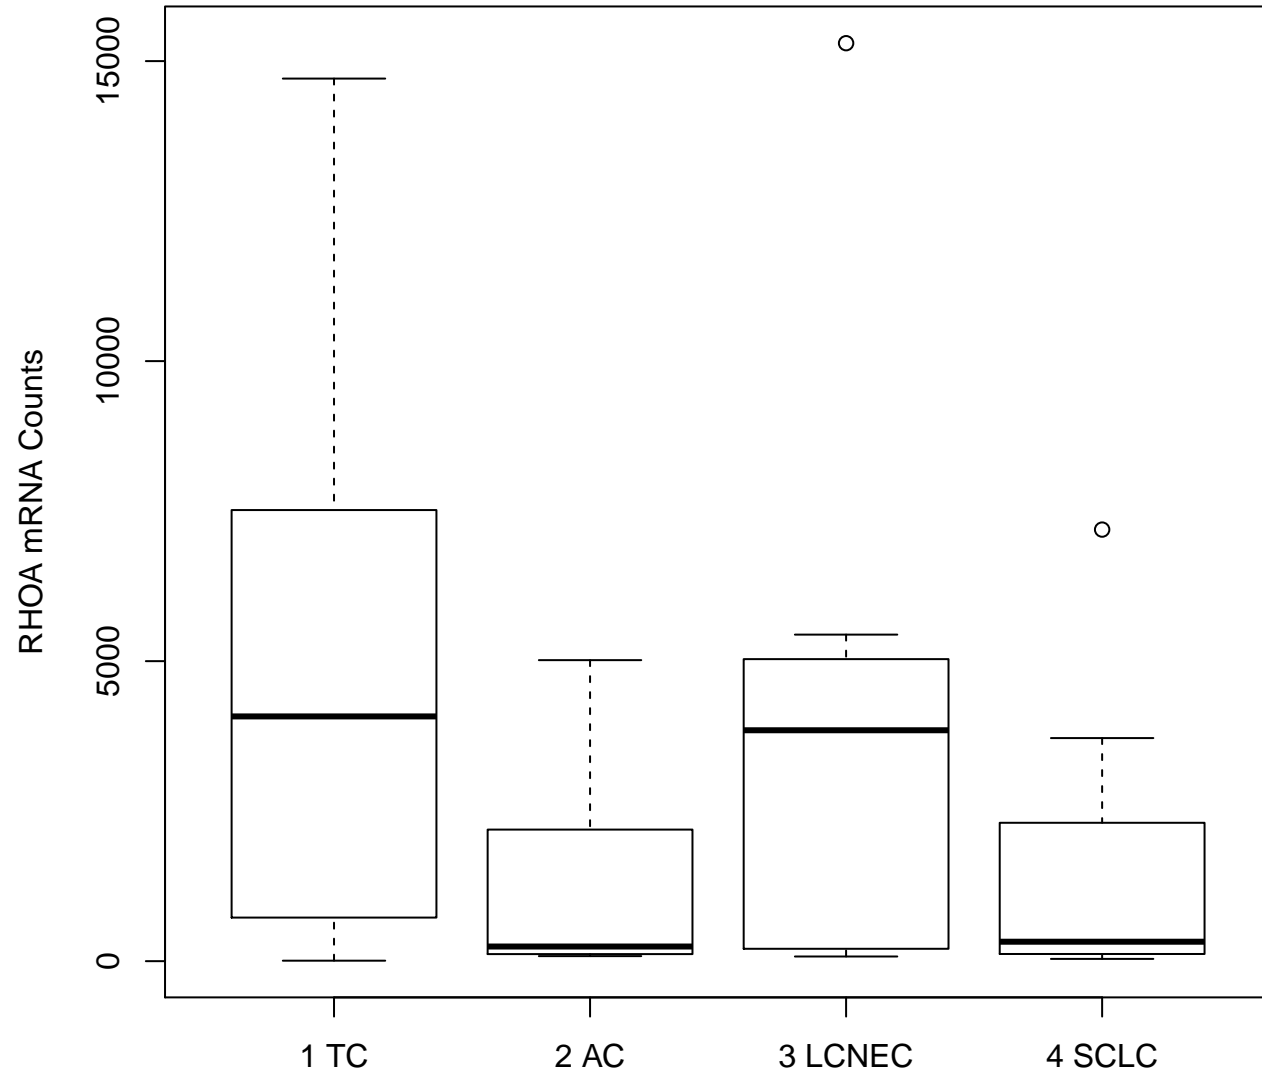

# Tumor Type

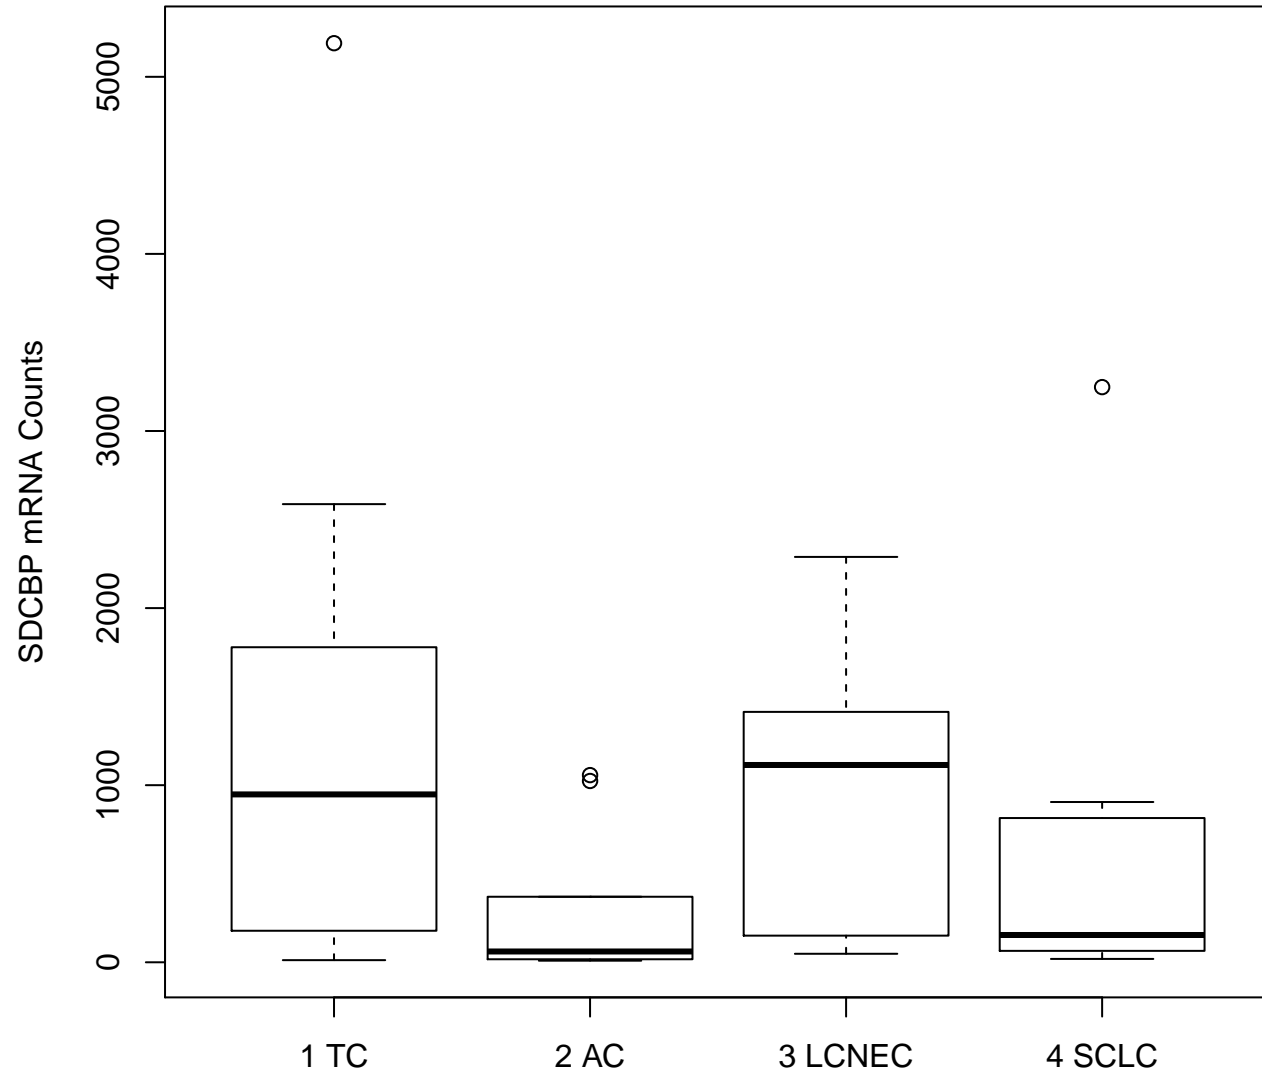



# Tumor Type

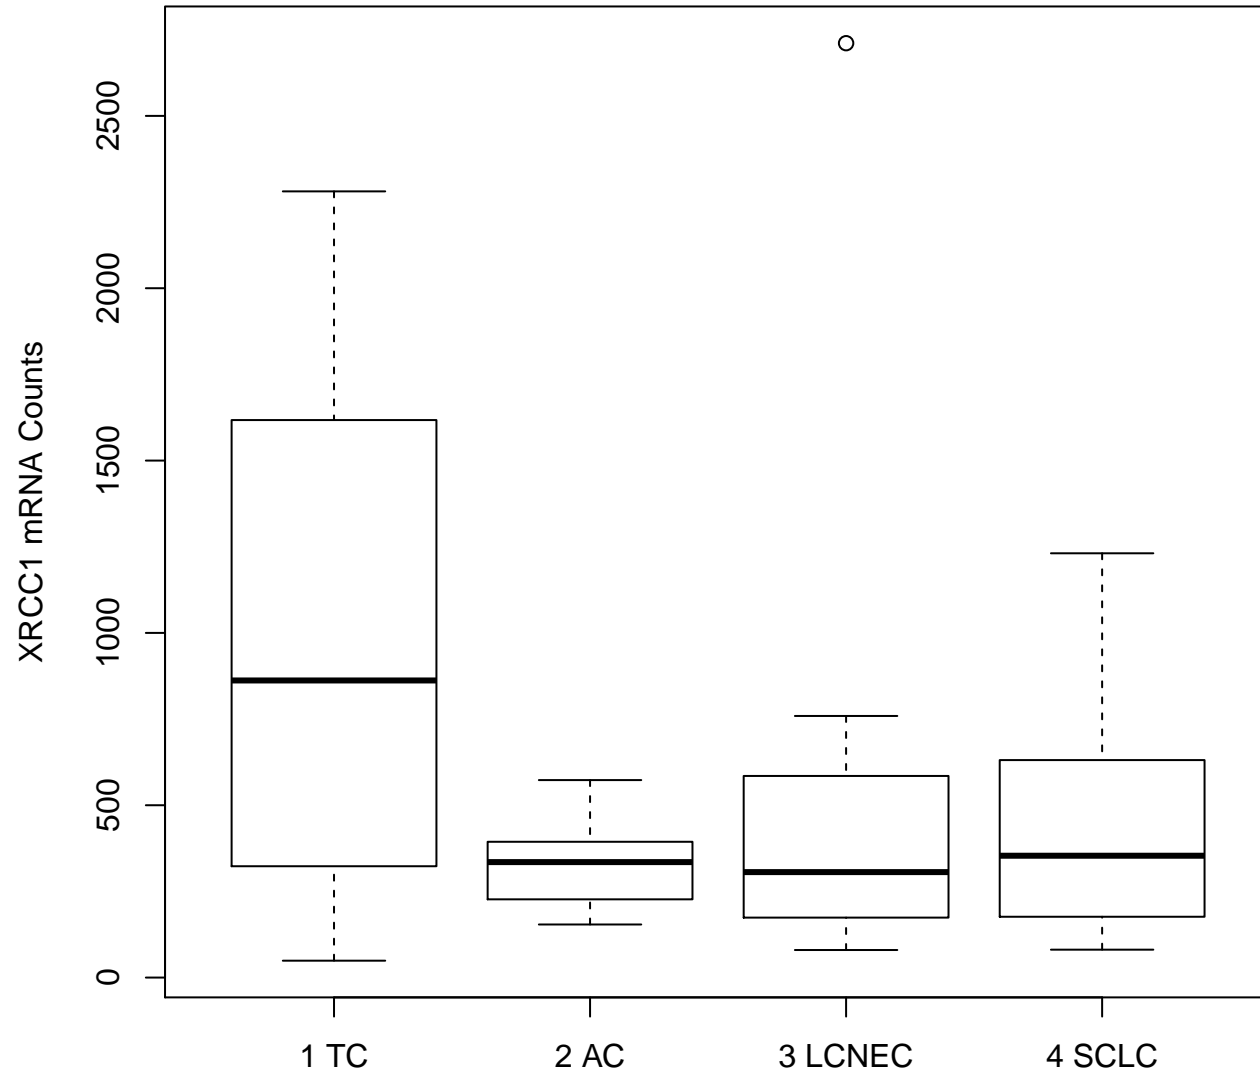

Supplement: pone.0165181.s001.pdf [file pone.0165181.s001.pdf]
