# Supplementary material for: ACTB, CDKN1B, GAPDH, GRB2, RHOA and SDCBP Were Identified as Reference Genes in Neuroendocrine Lung Cancer via the nCounter Technology
Source: PubMed Central journal article supplement (PMC5089548; doi:10.1371/journal.pone.0165181), 2016-11-01

# GAPDH mRNA Counts versus ACTB mRNA Counts

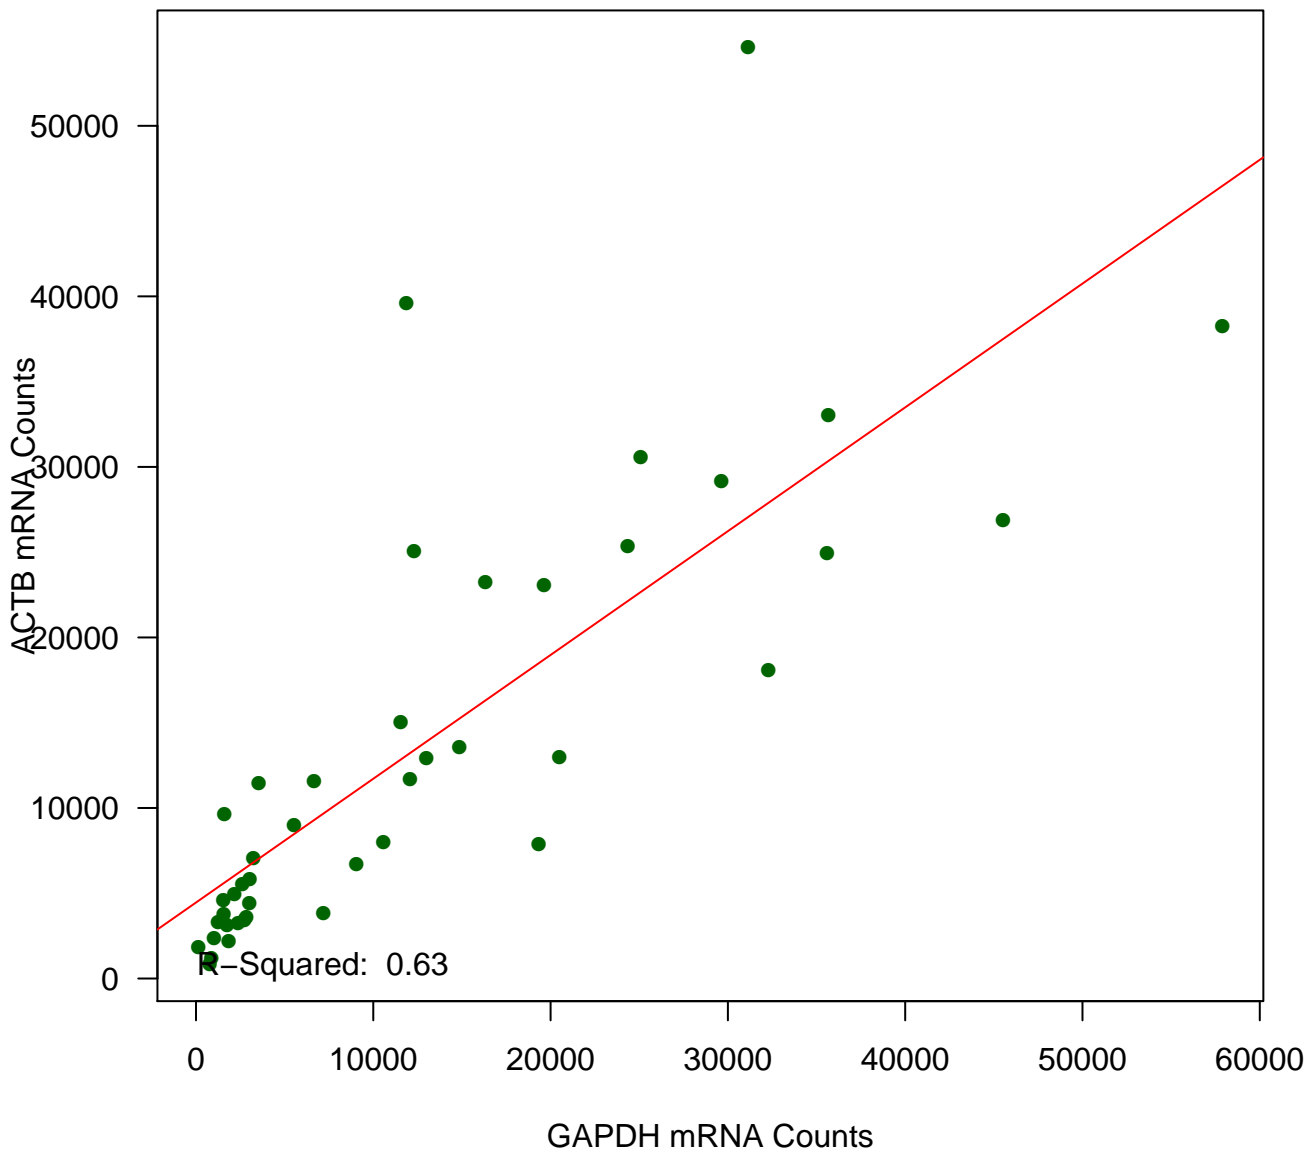

# CDKN1B mRNA Counts versus ACTB mRNA Counts

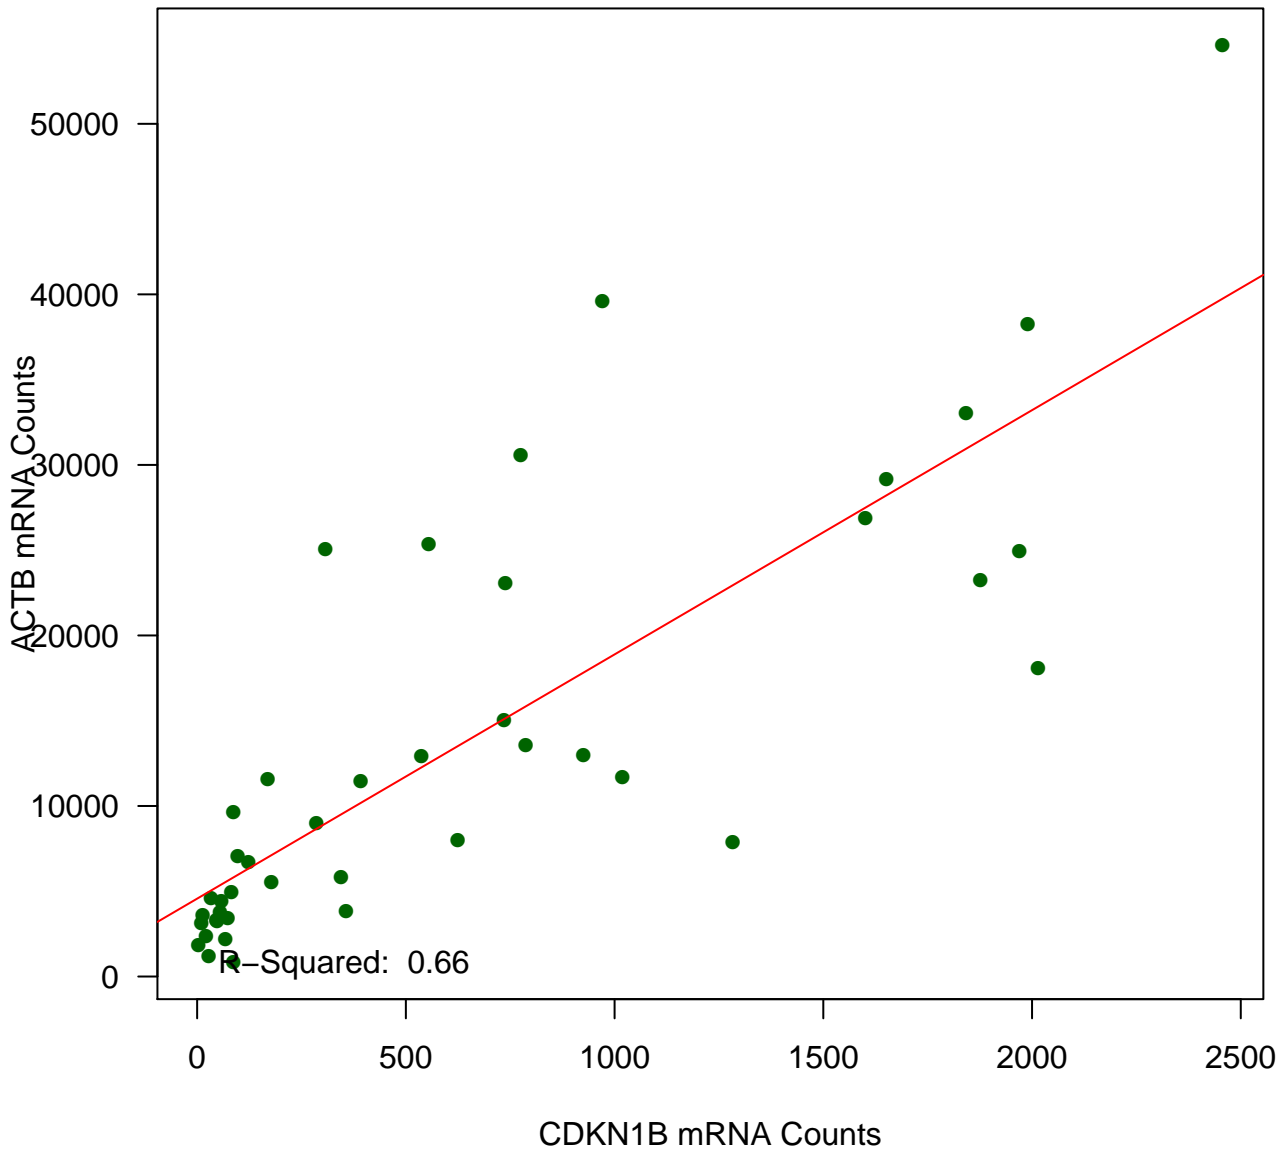

# GRB2 mRNA Counts versus ACTB mRNA Counts

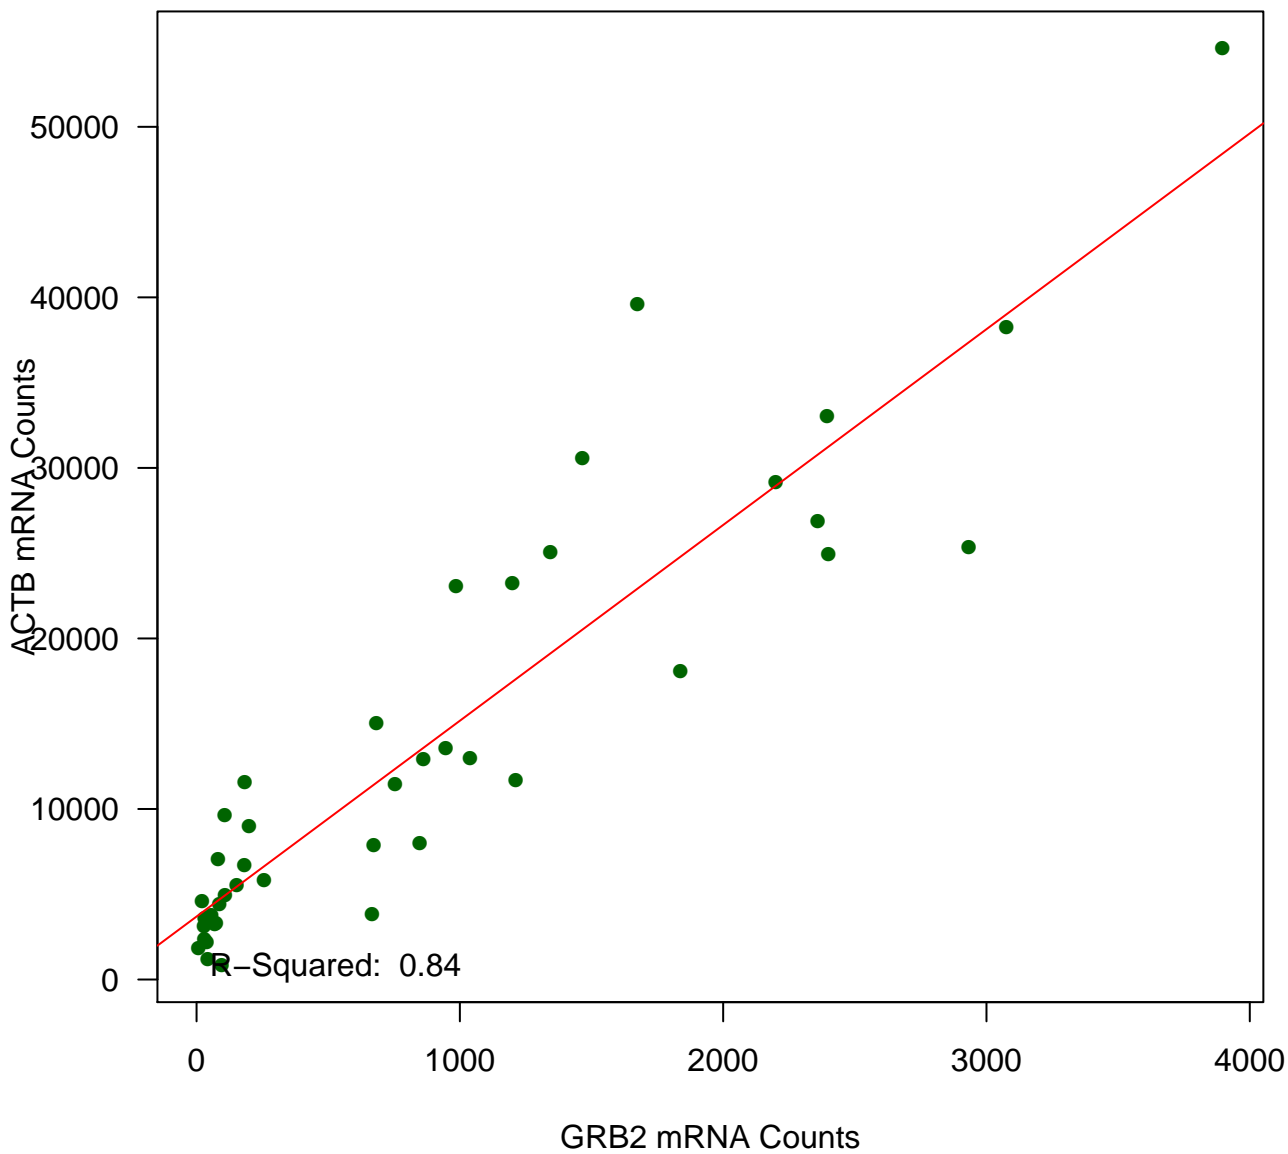

# LDHB mRNA Counts versus ACTB mRNA Counts

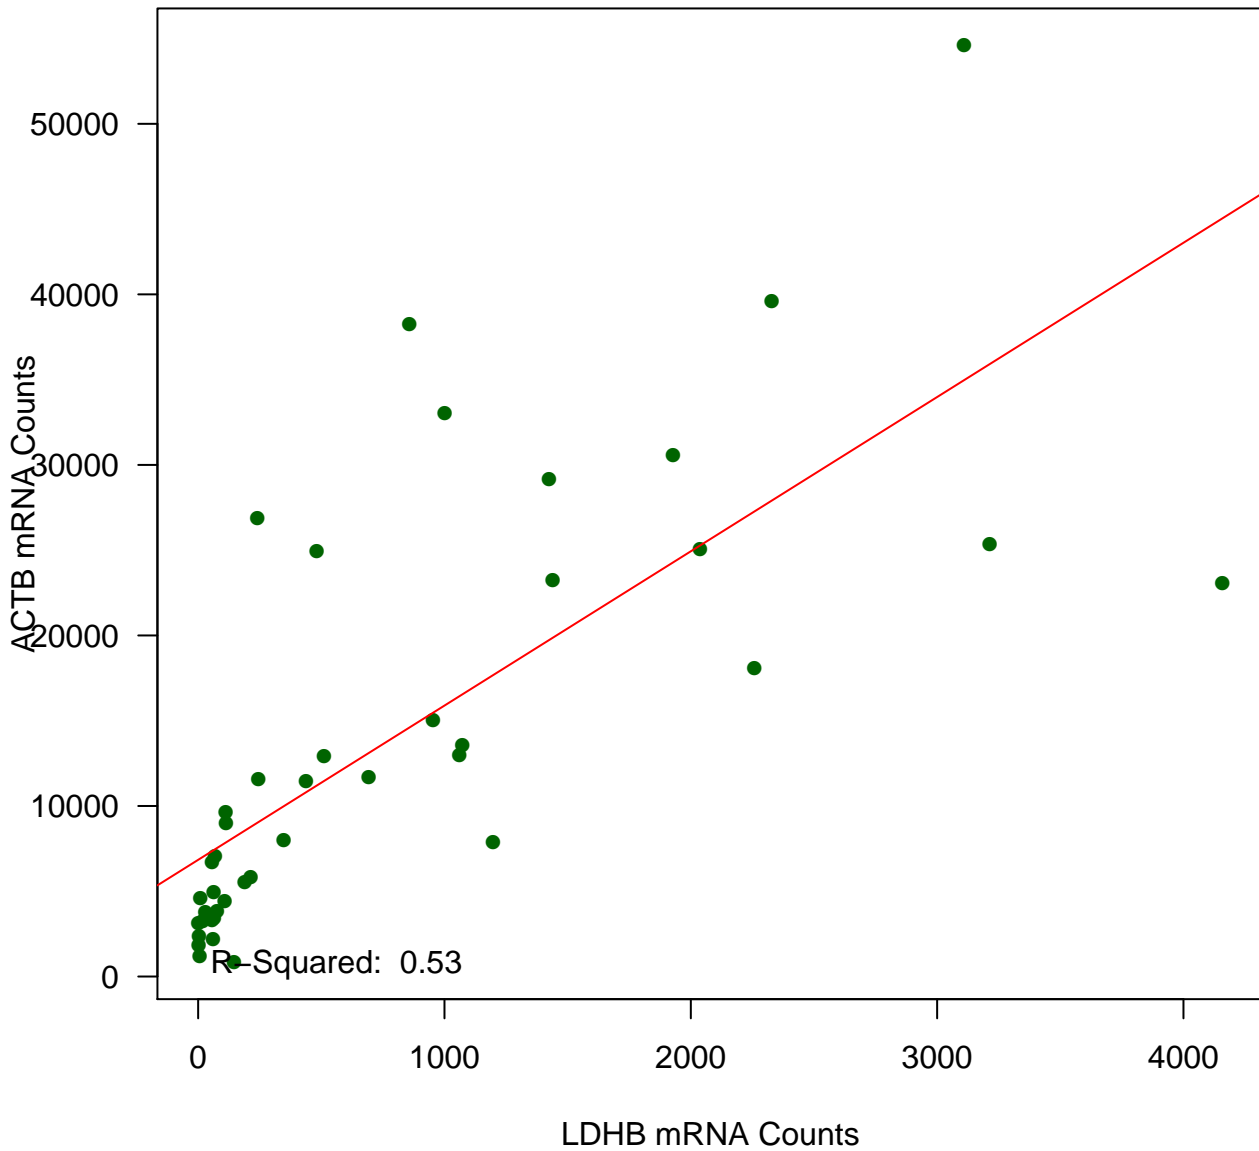

# PNN mRNA Counts versus ACTB mRNA Counts

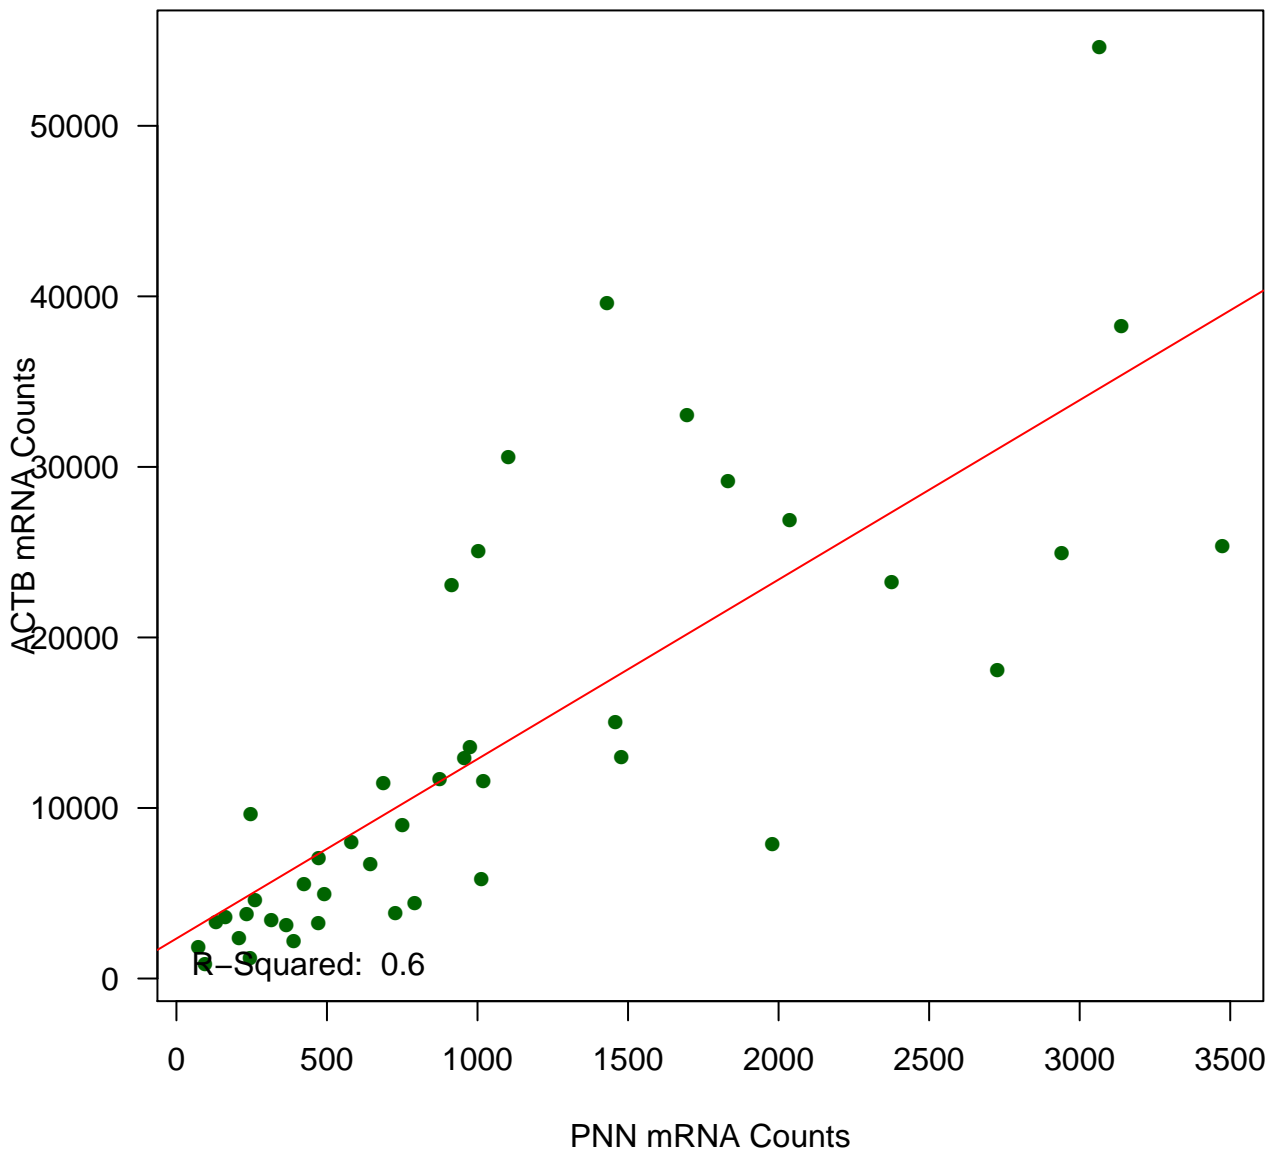

# RHOA mRNA Counts versus ACTB mRNA Counts

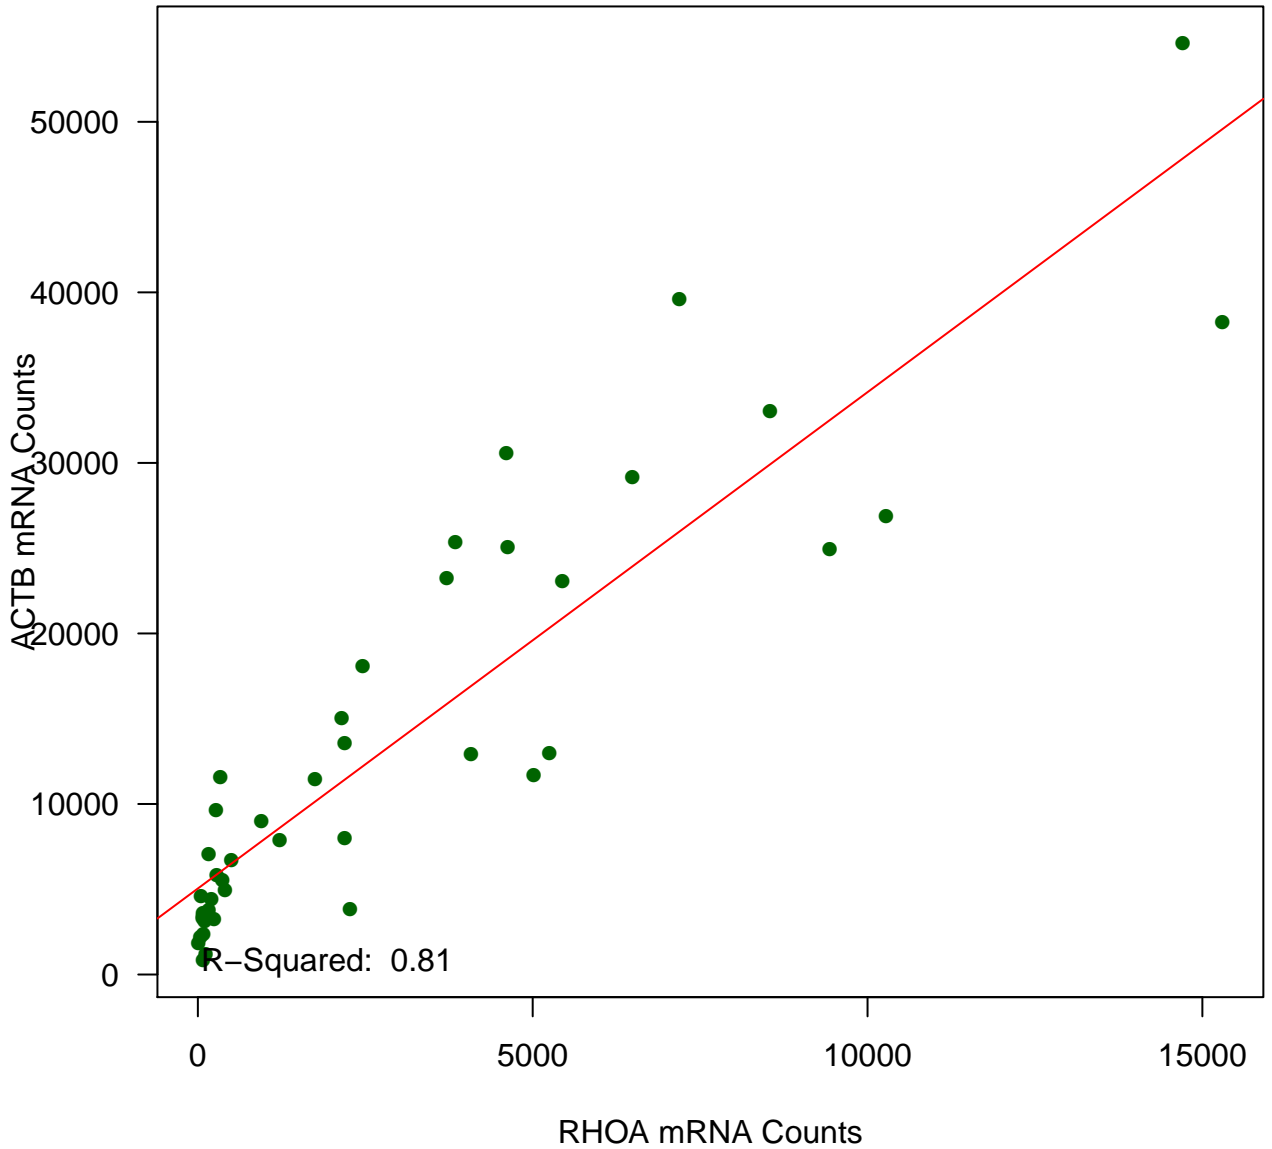

# SDCBP mRNA Counts versus ACTB mRNA Counts

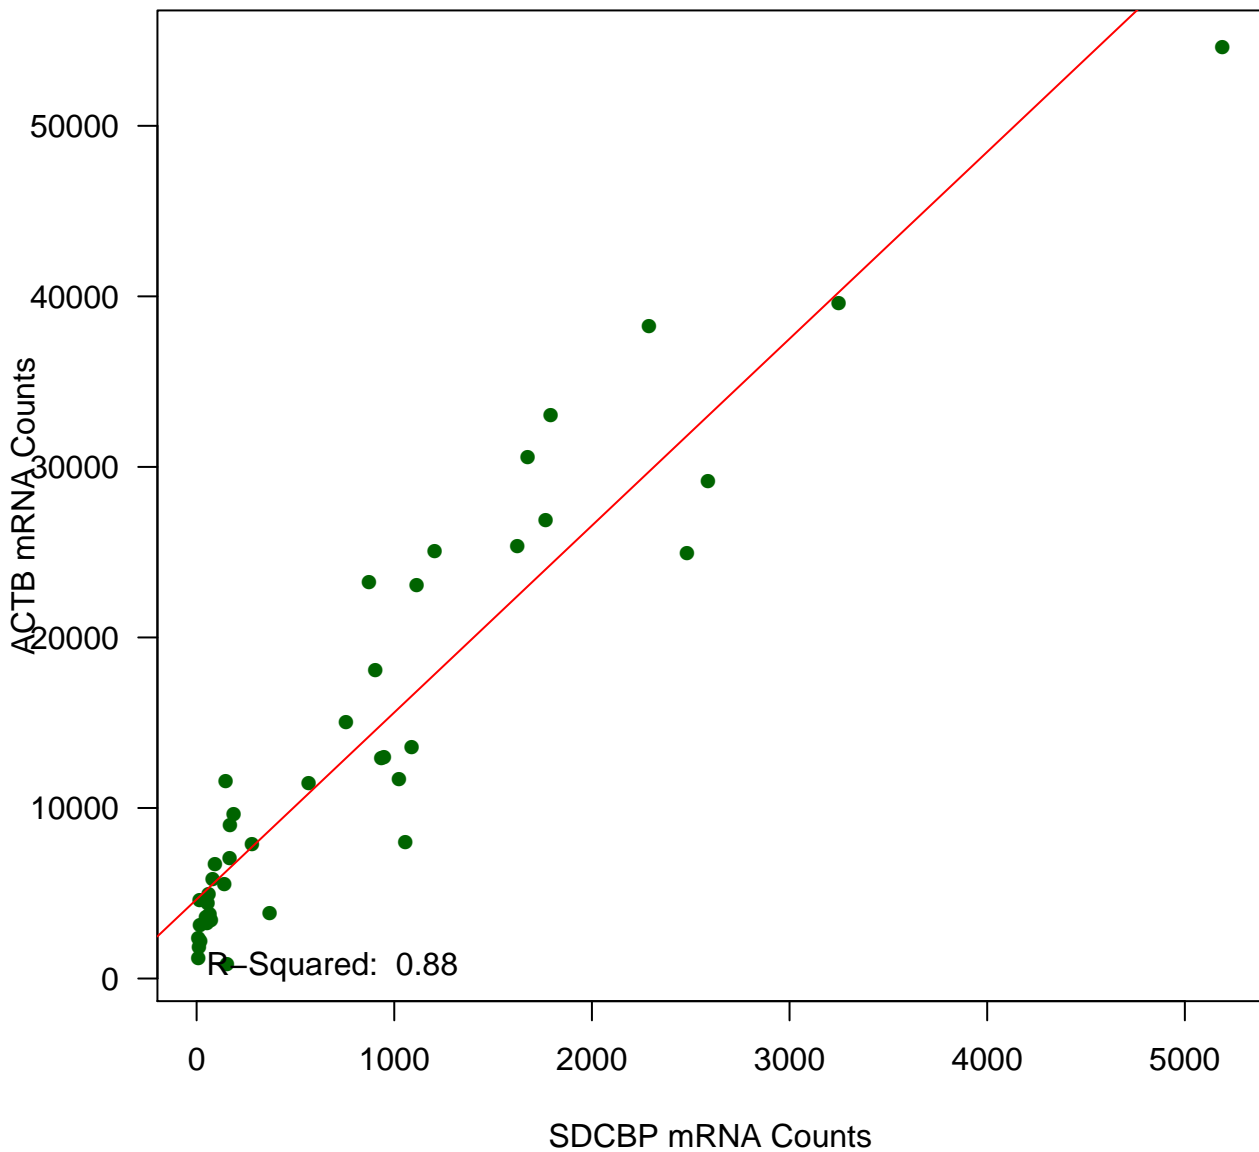

# CDK6 mRNA Counts versus ACTB mRNA Counts

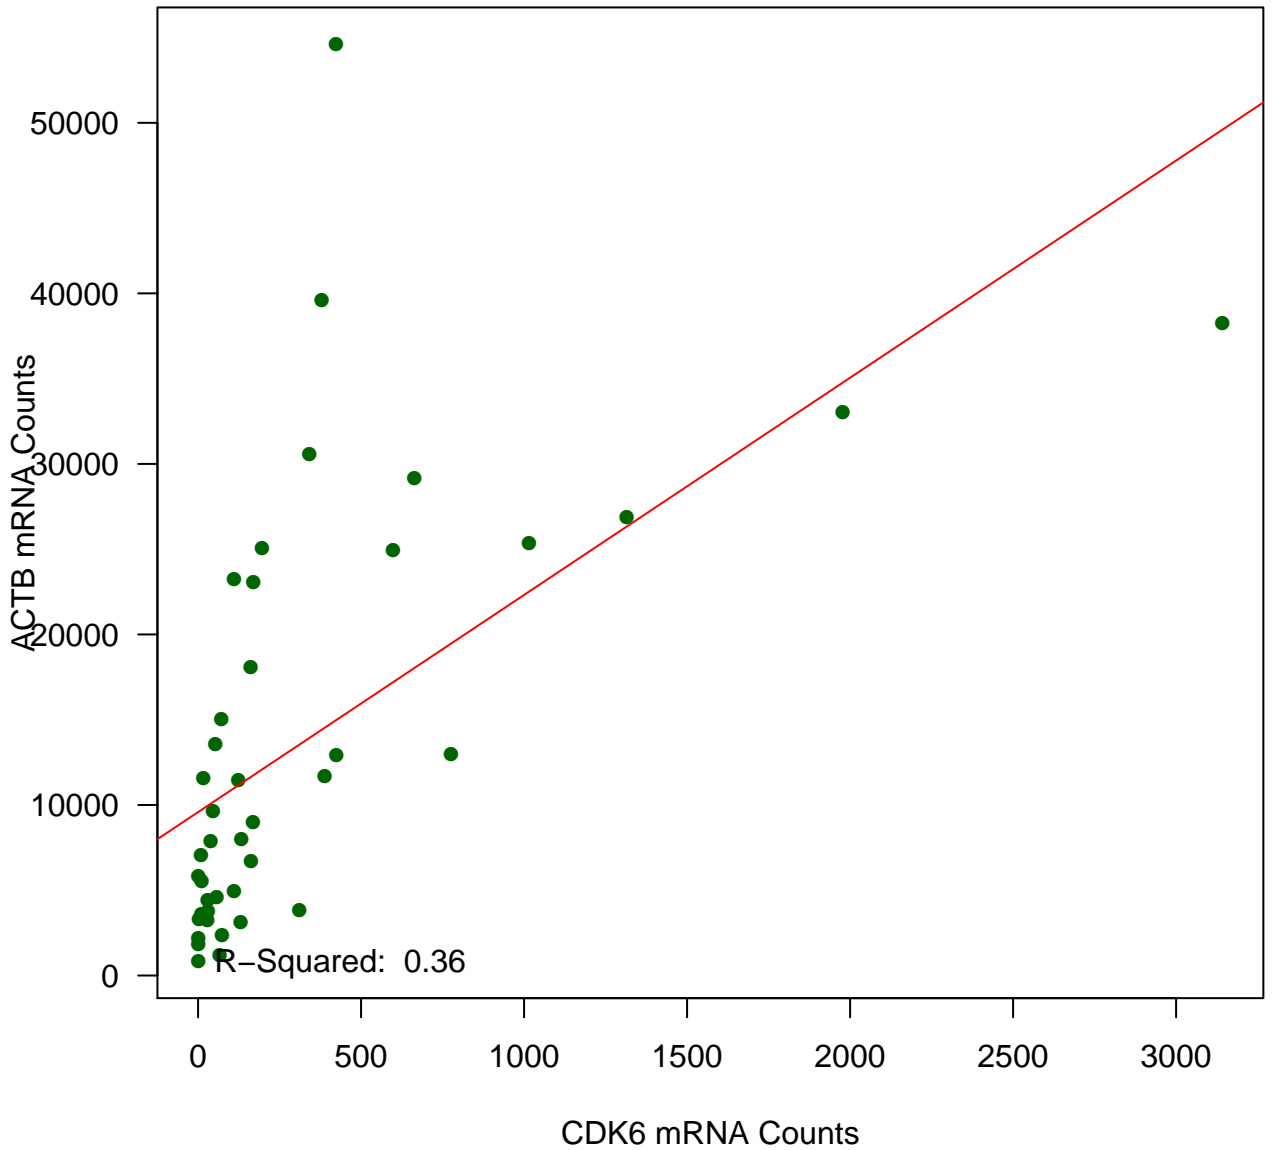



# TYMS mRNA Counts versus ACTB mRNA Counts

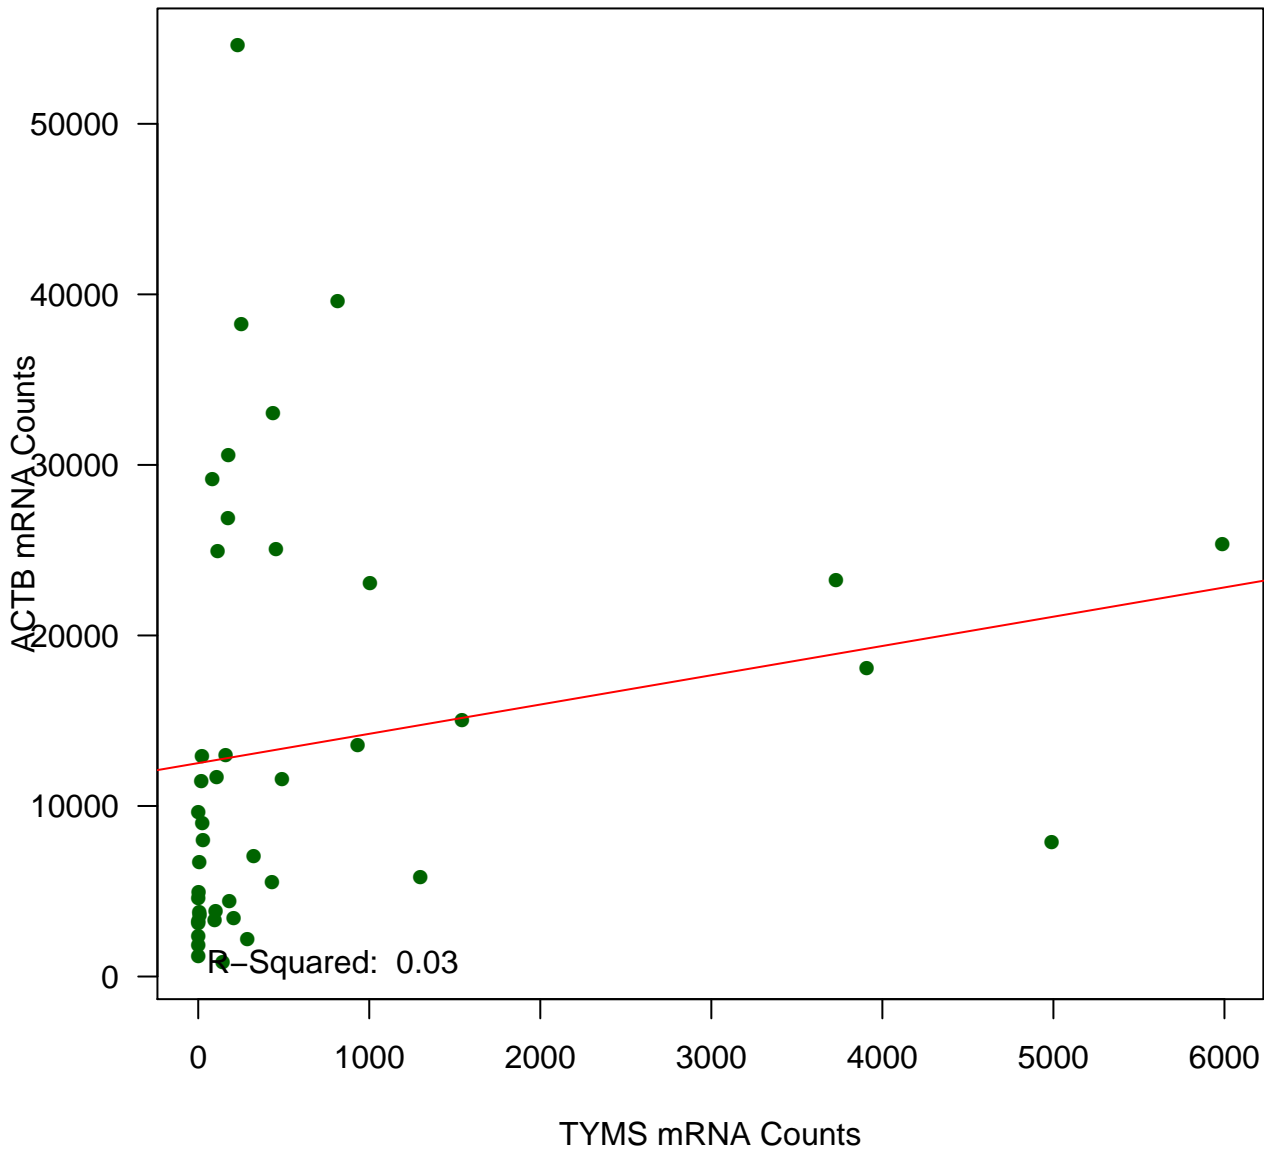

# CDKN1B mRNA Counts versus GAPDH mRNA Counts

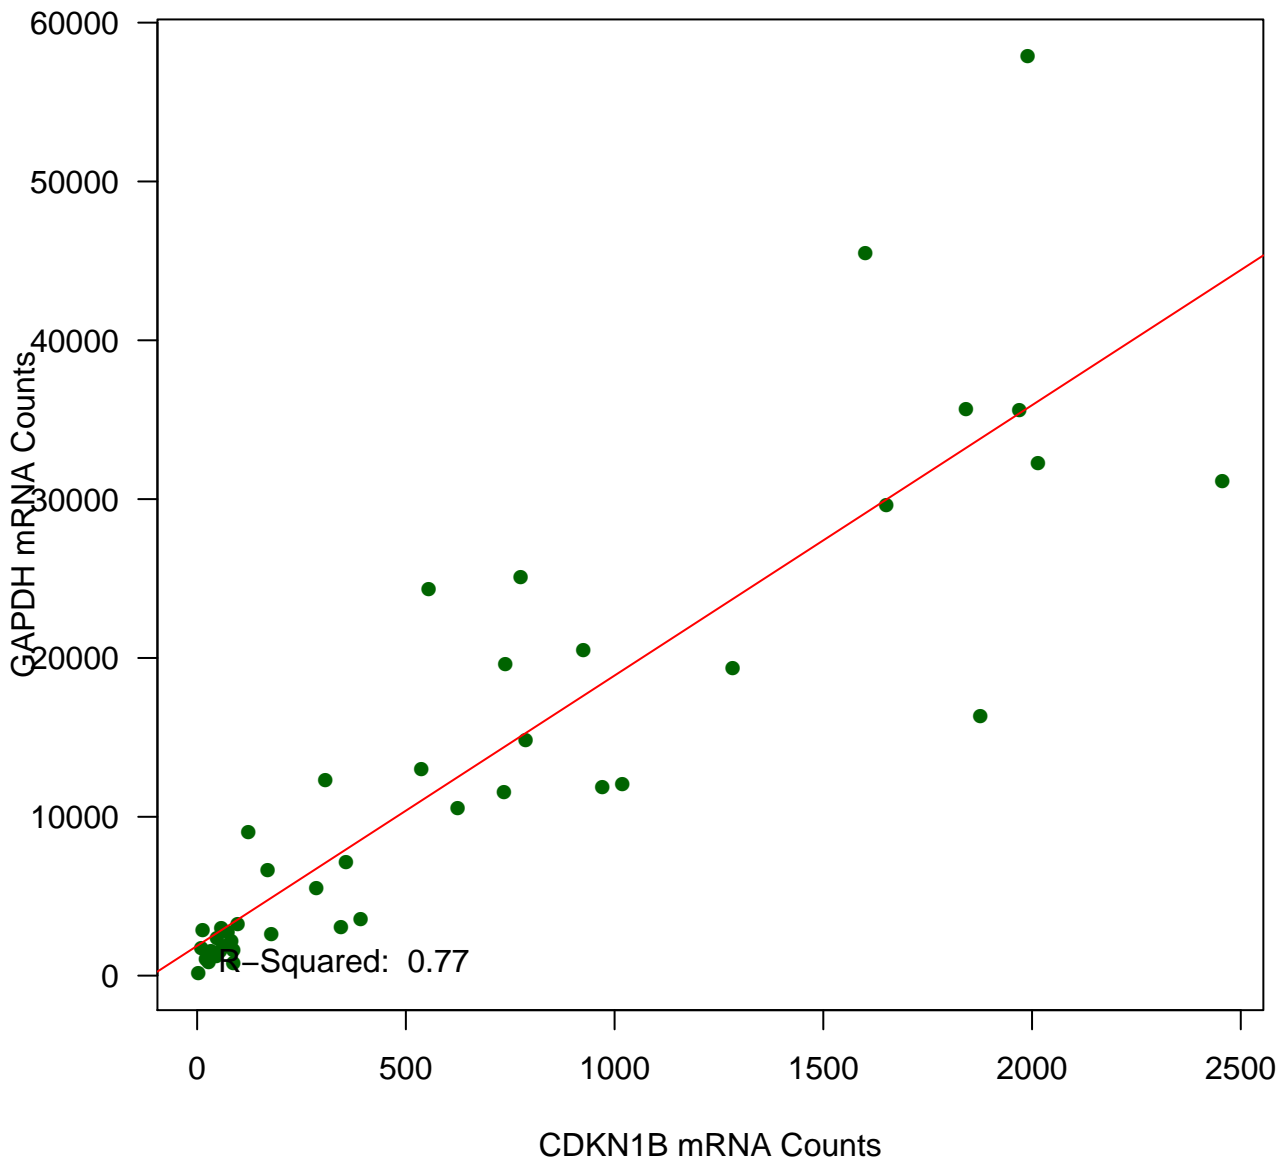

# GRB2 mRNA Counts versus GAPDH mRNA Counts

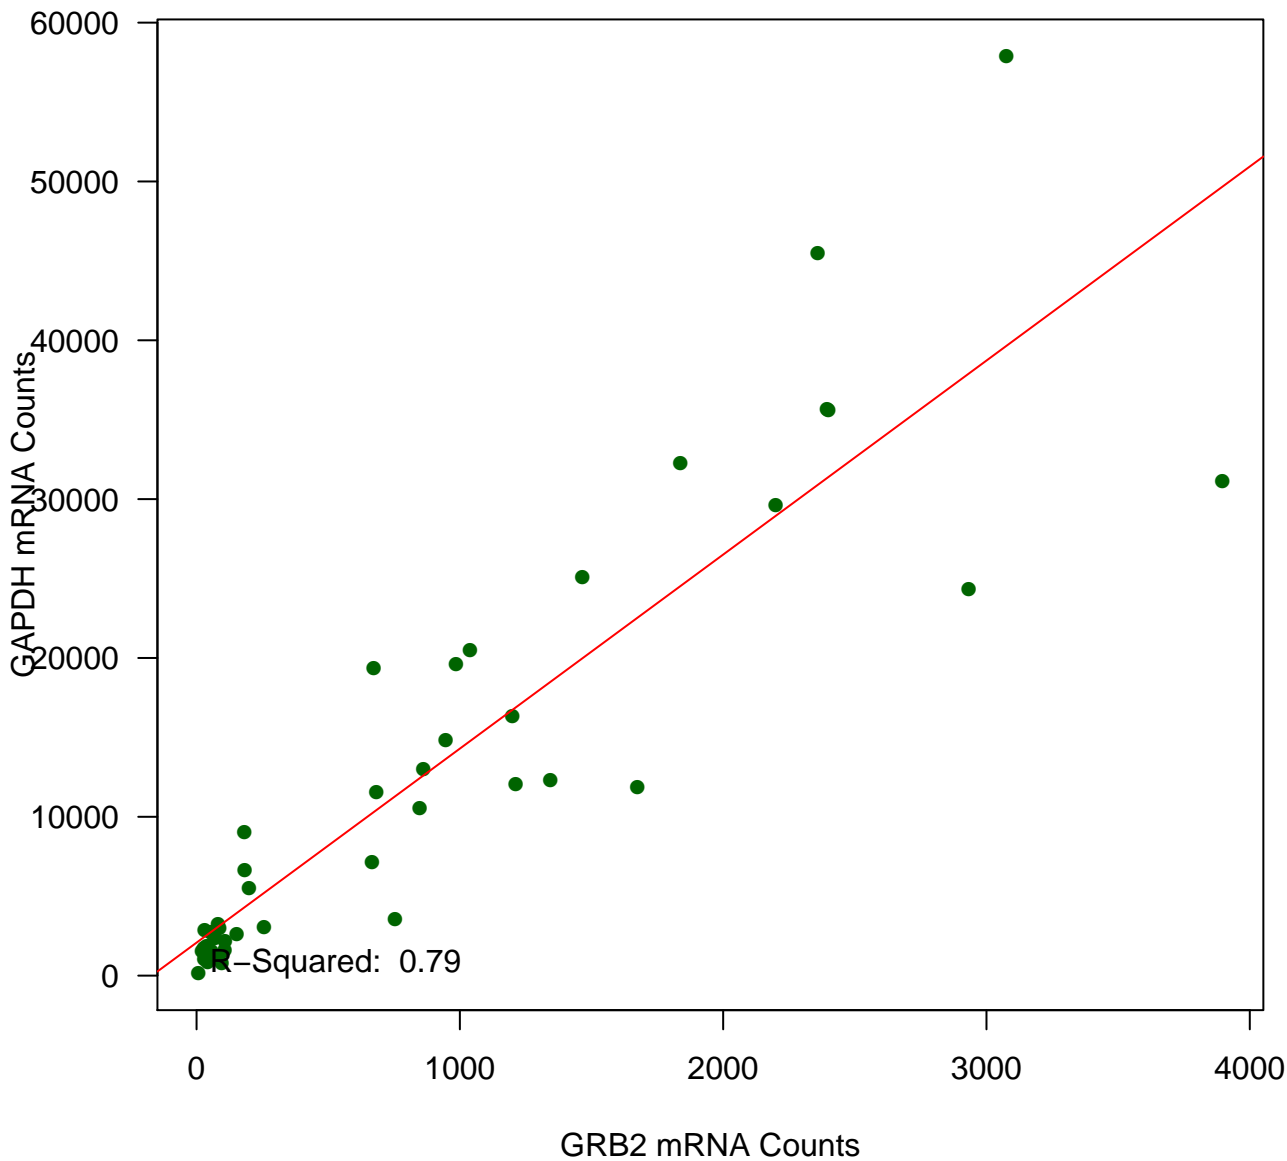

# LDHB mRNA Counts versus GAPDH mRNA Counts

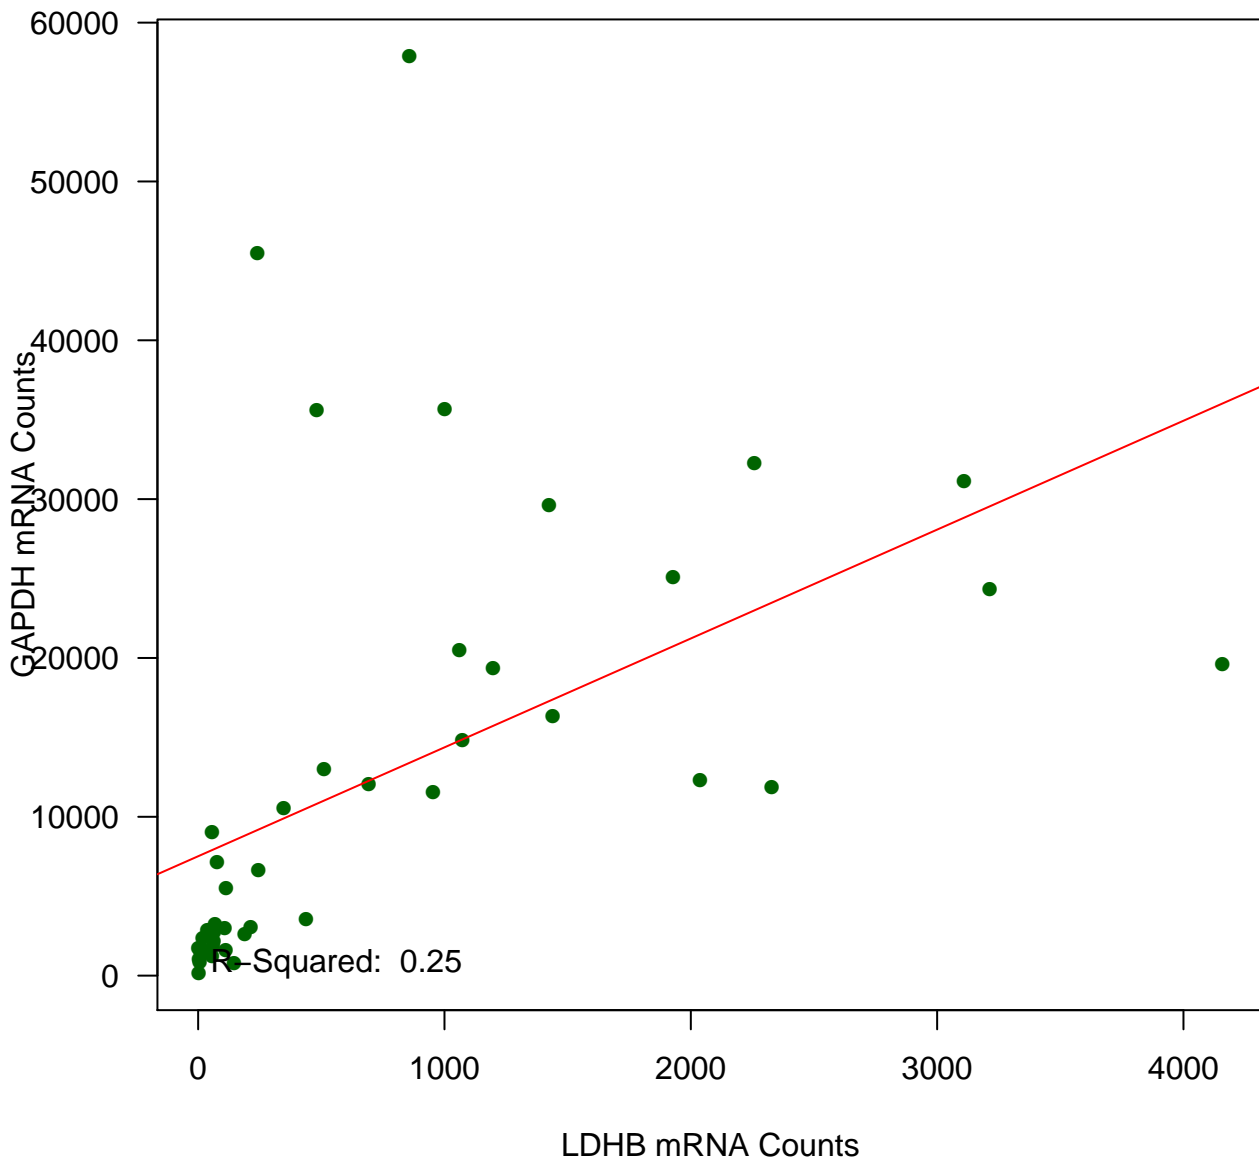

# PNN mRNA Counts versus GAPDH mRNA Counts

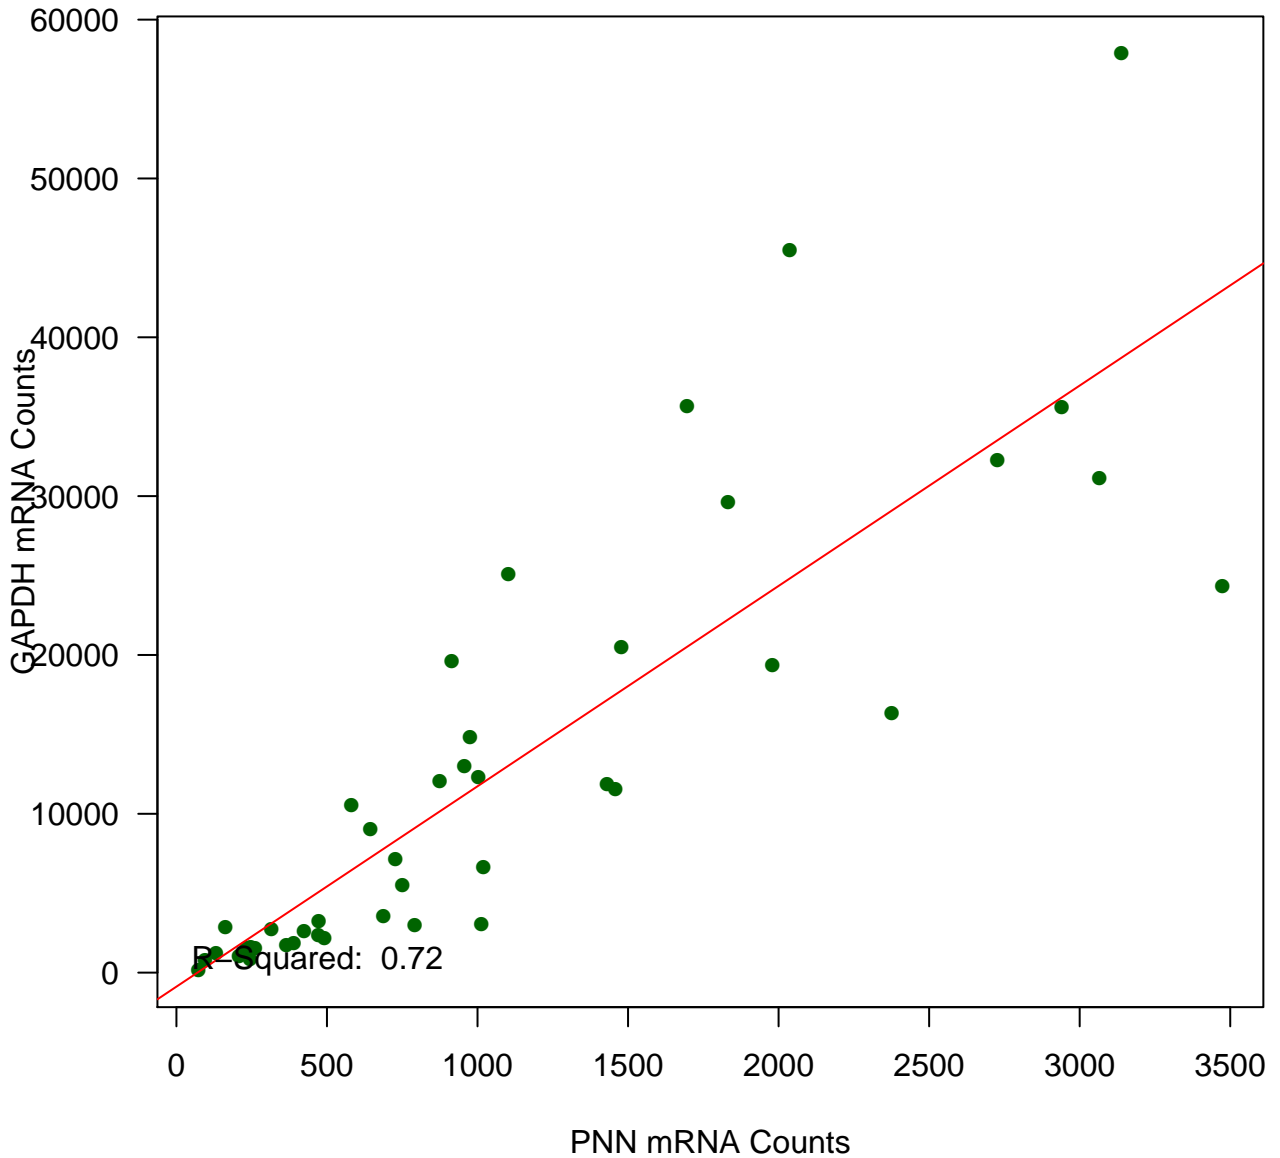

# RHOA mRNA Counts versus GAPDH mRNA Counts

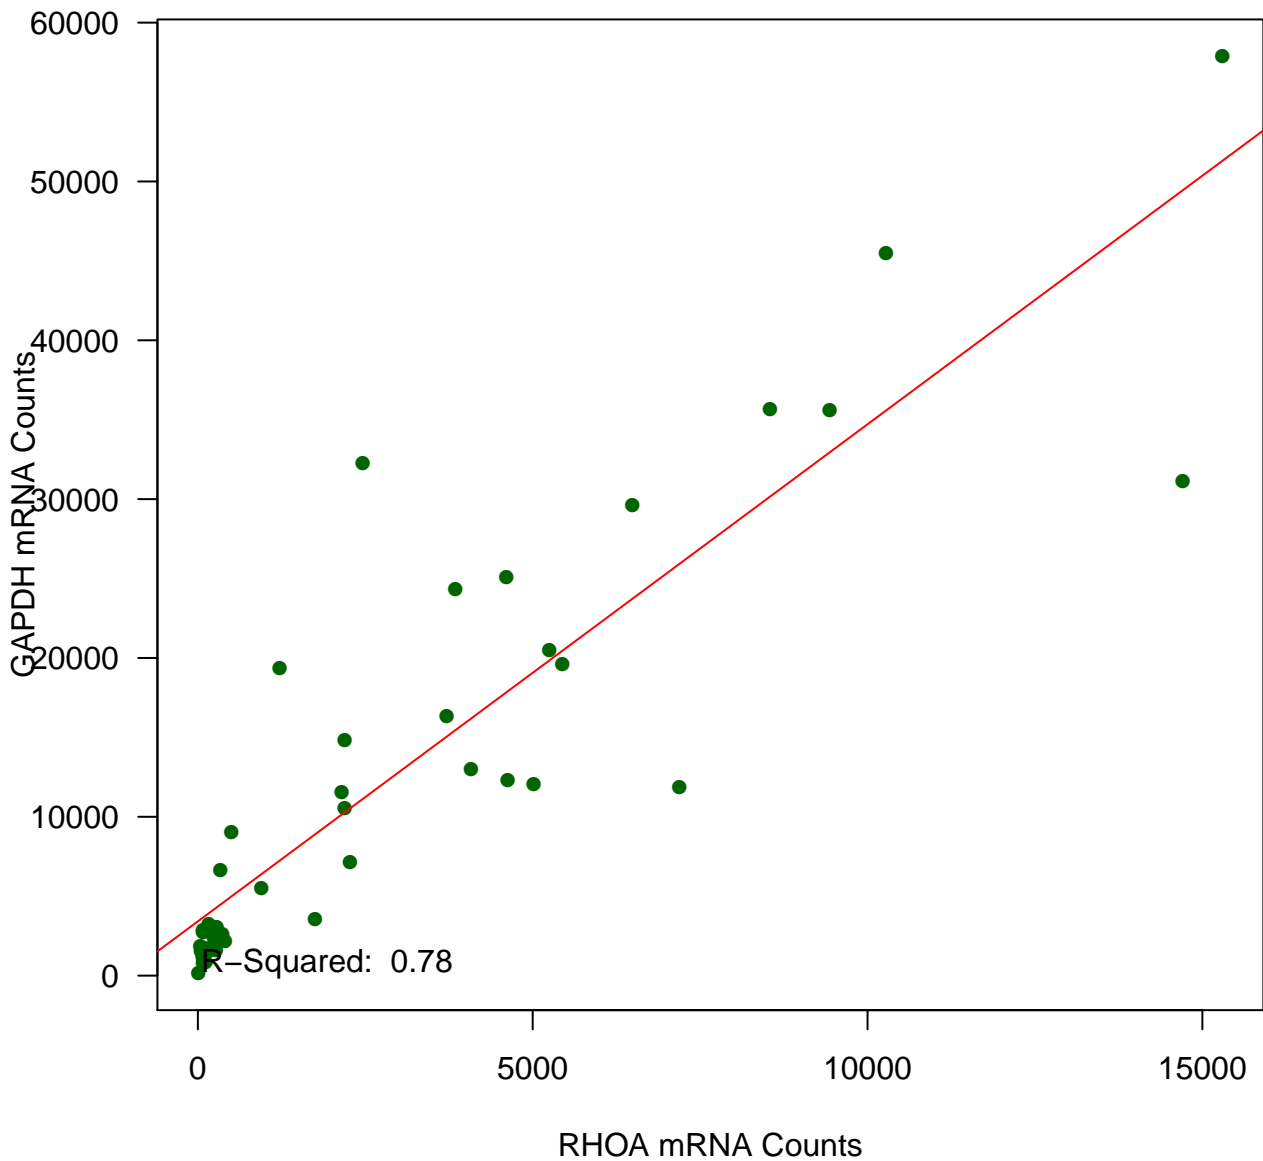

# SDCBP mRNA Counts versus GAPDH mRNA Counts

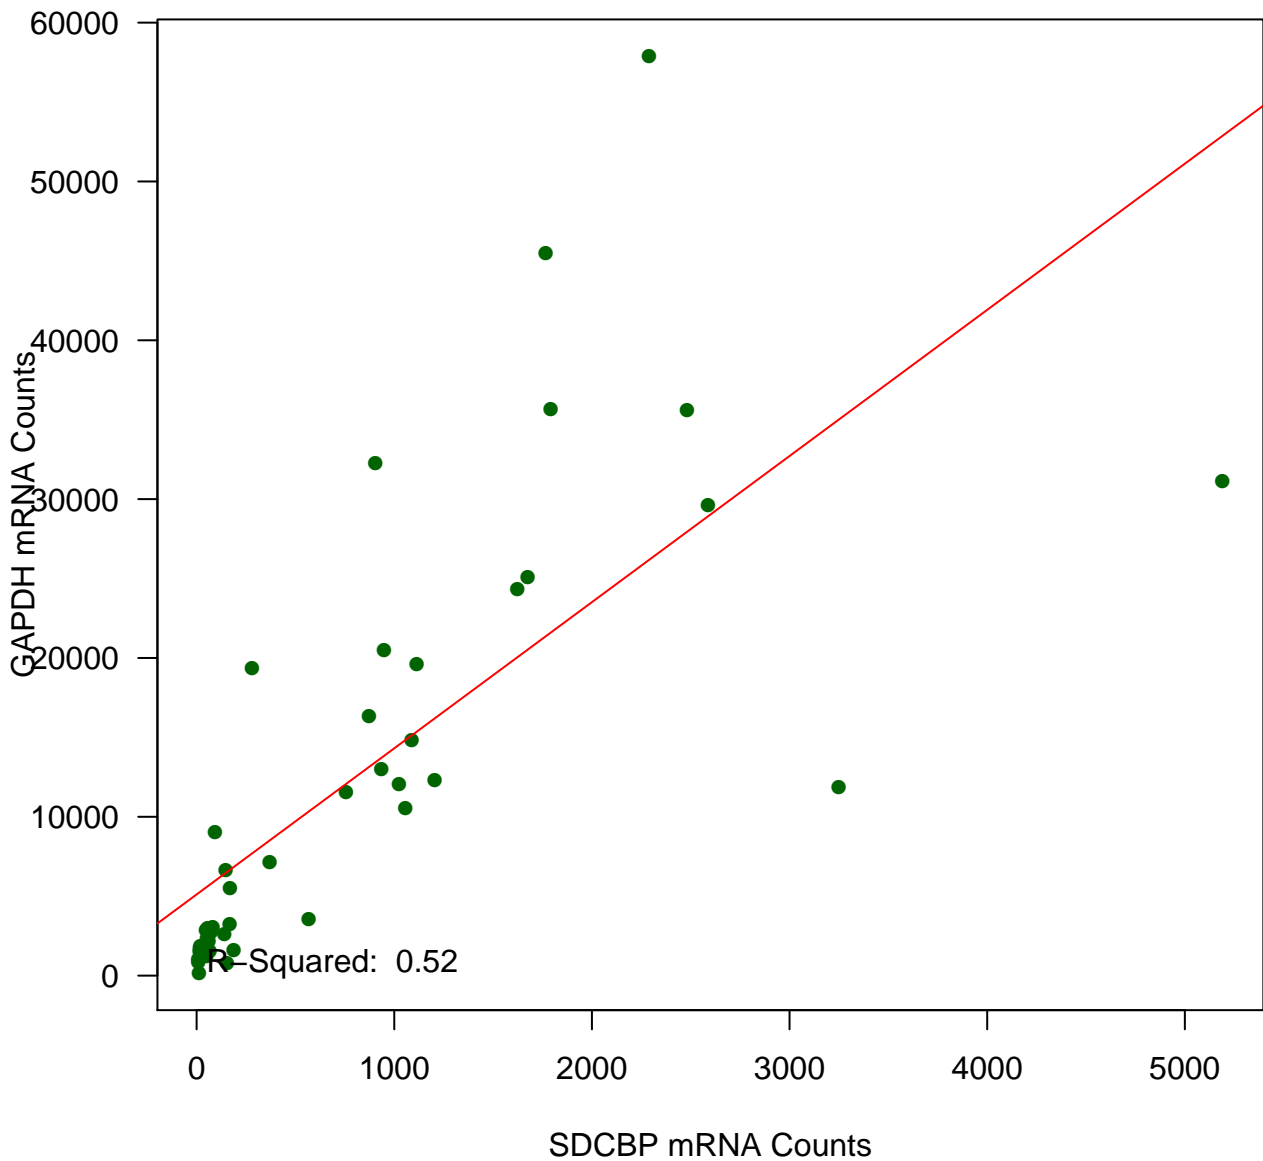

## CDK6 mRNA Counts versus GAPDH mRNA Counts

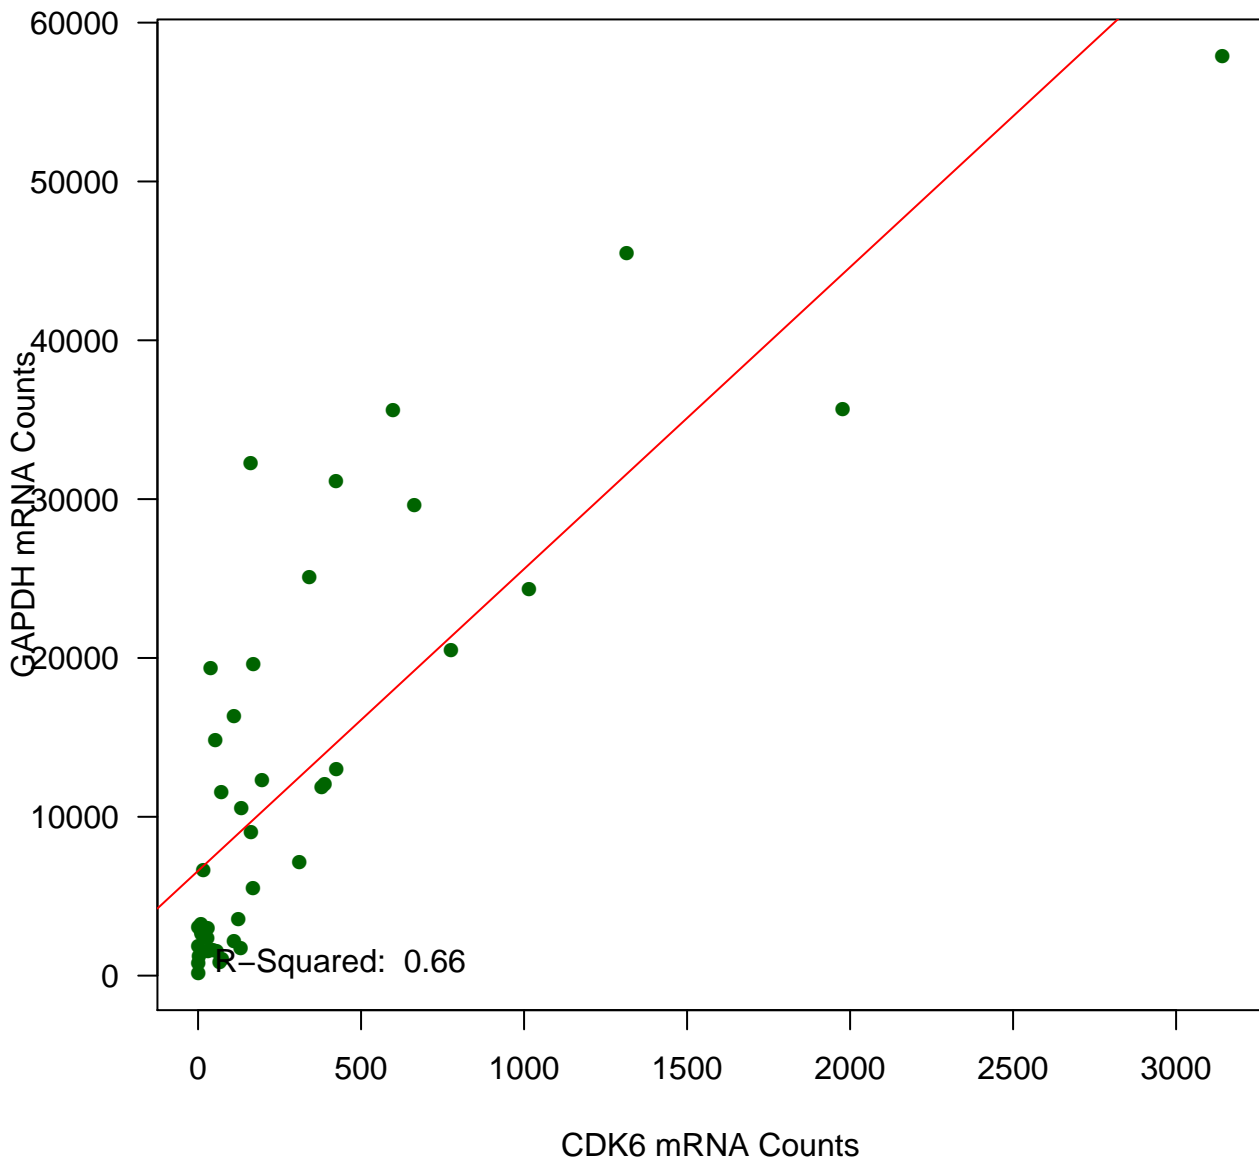



# TYMS mRNA Counts versus GAPDH mRNA Counts

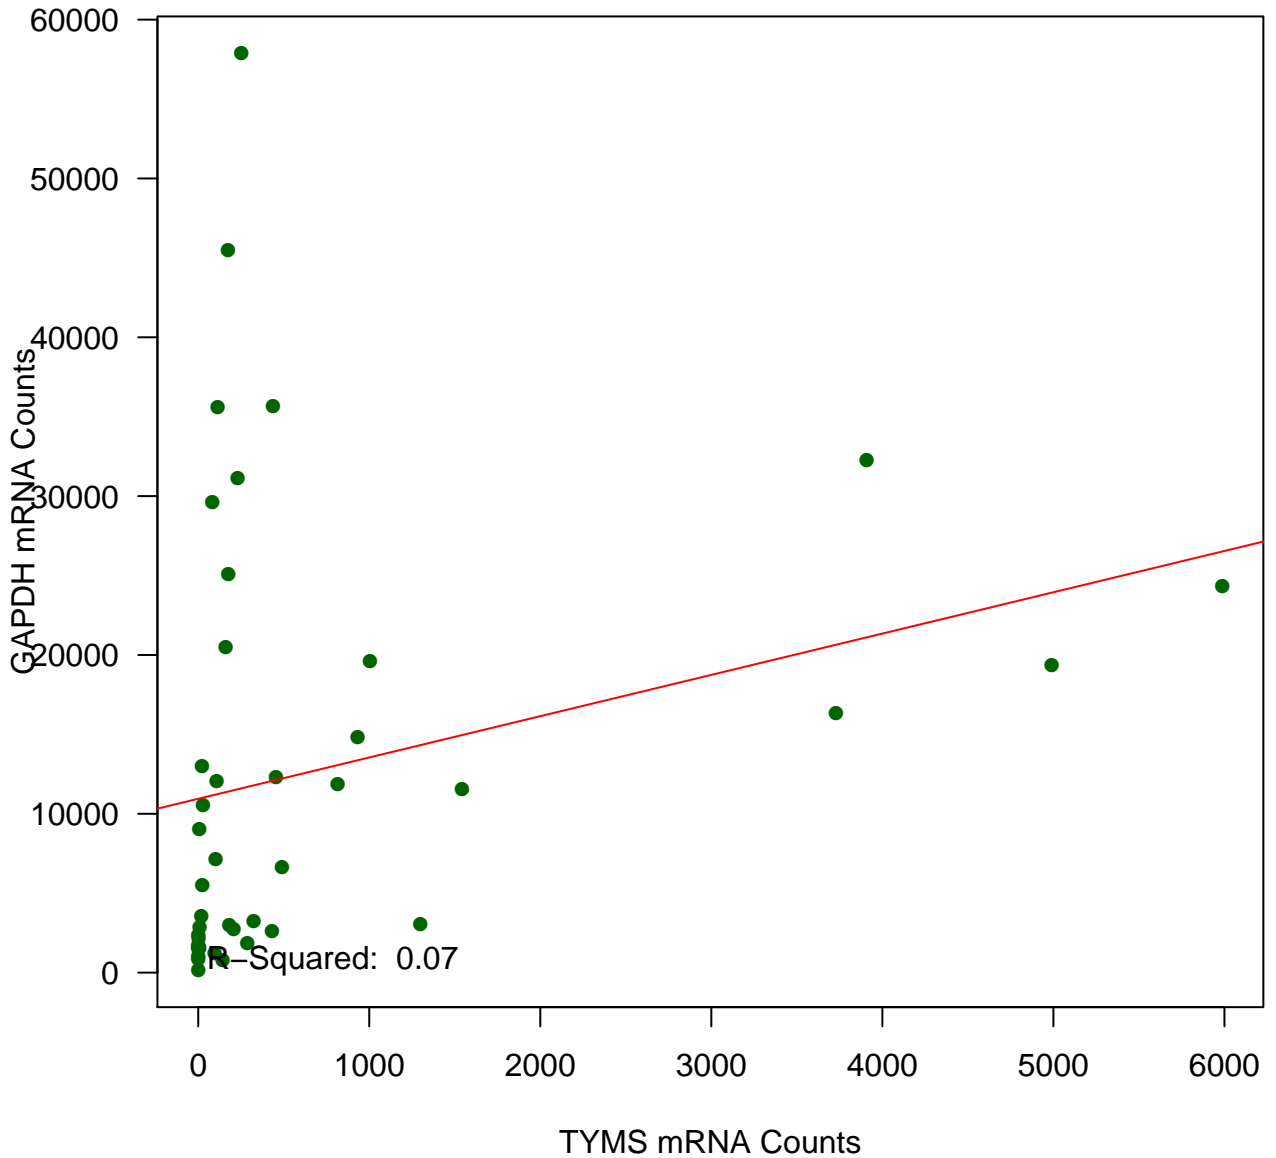

# GRB2 mRNA Counts versus CDKN1B mRNA Counts

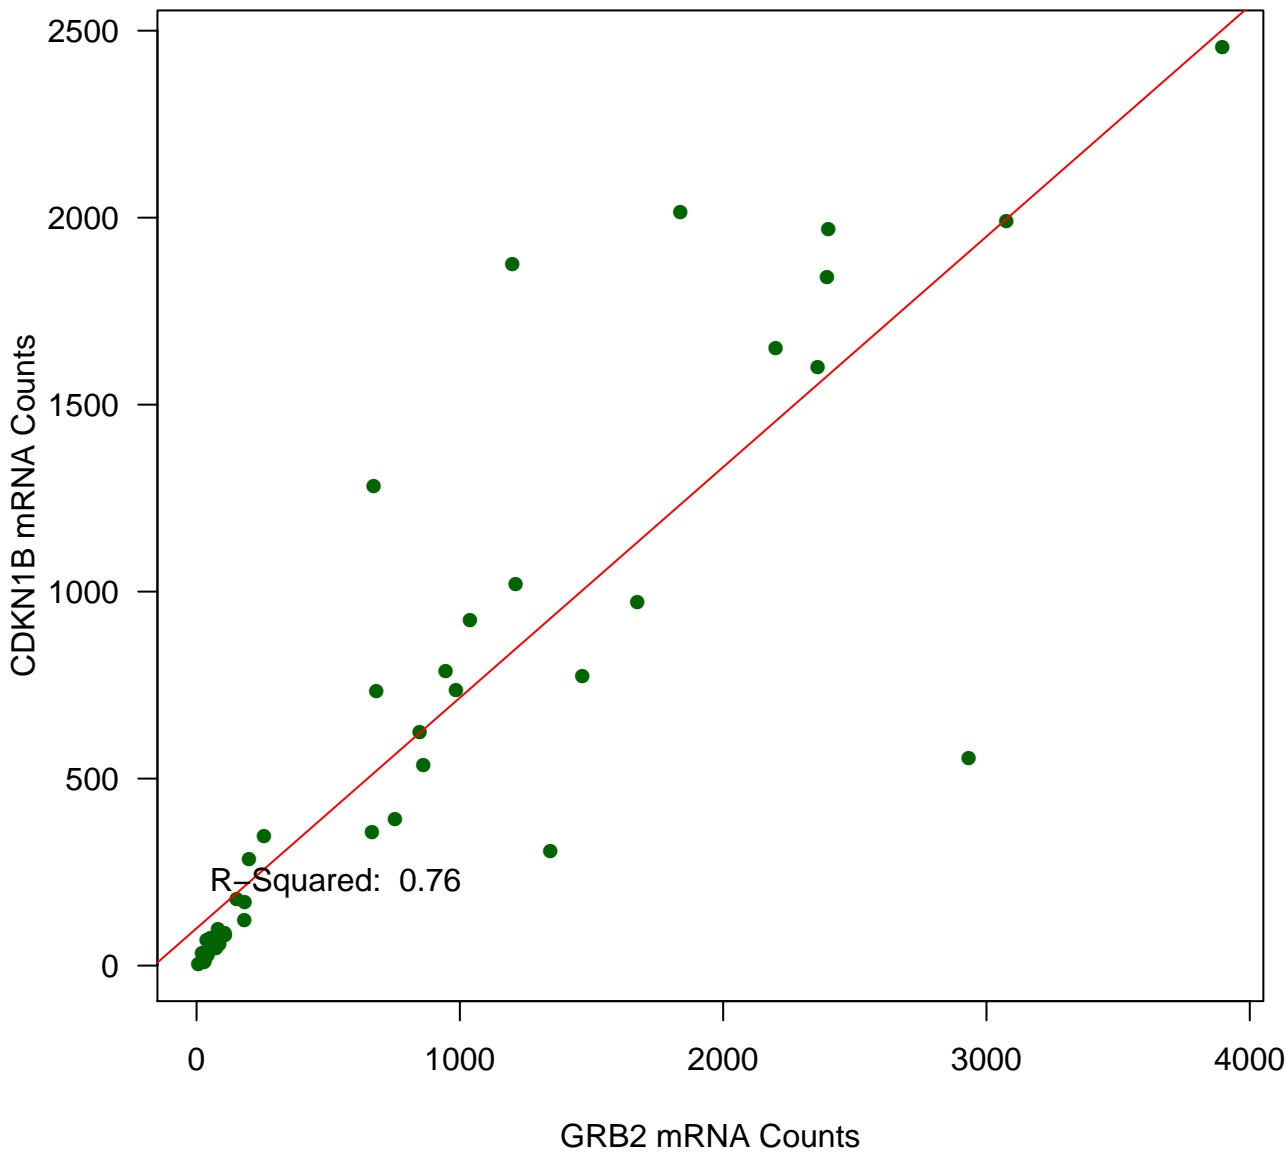

# LDHB mRNA Counts versus CDKN1B mRNA Counts

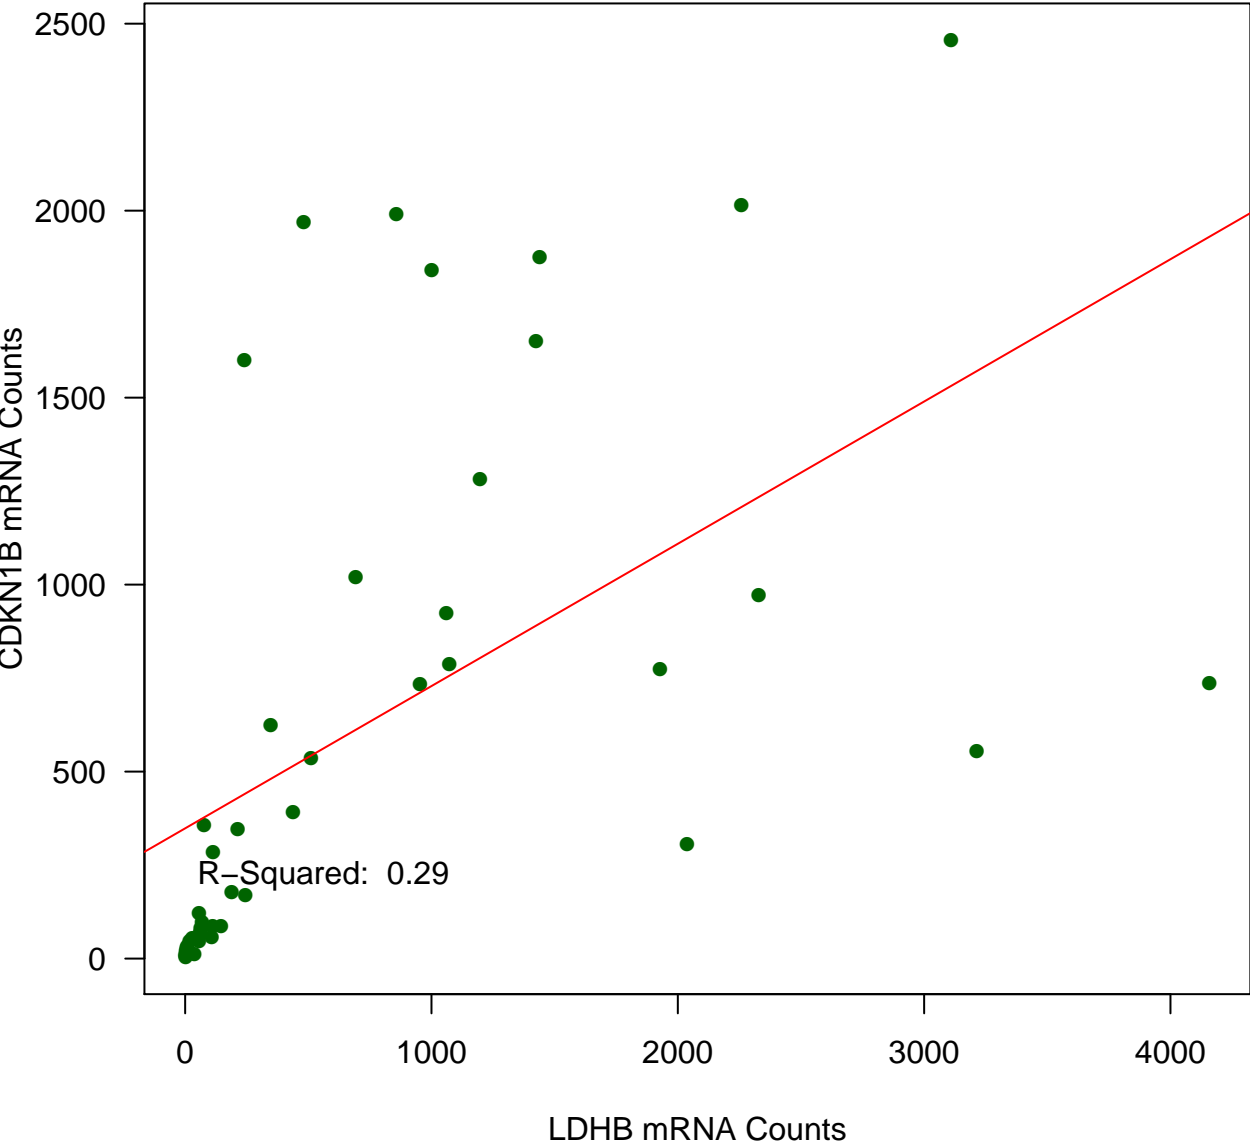

# PNN mRNA Counts versus CDKN1B mRNA Counts

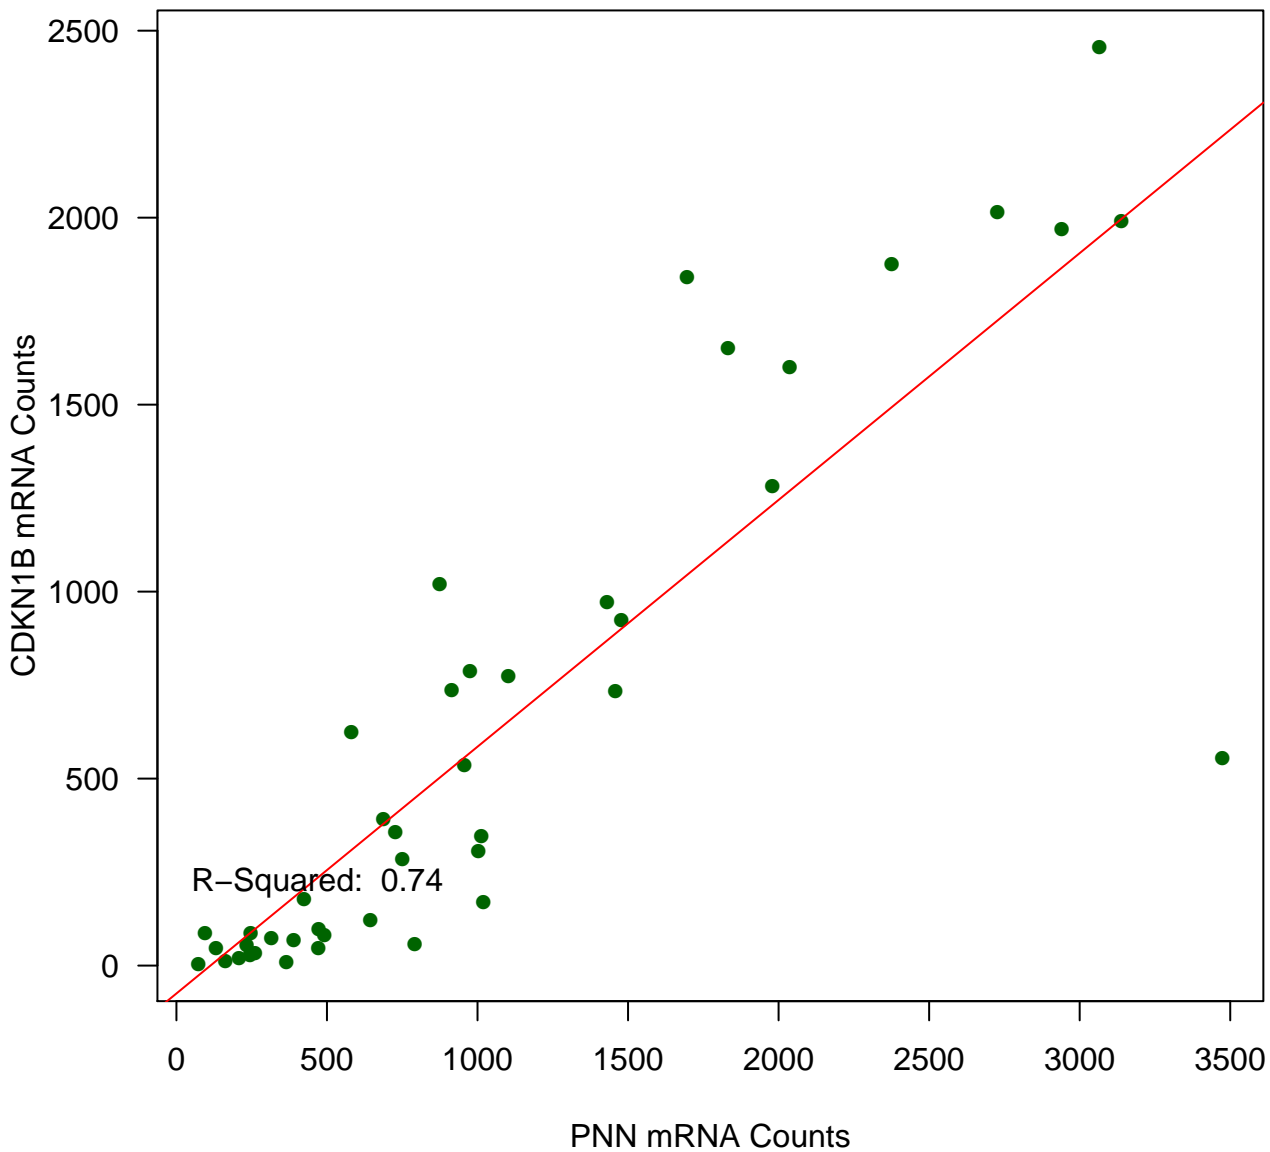

# RHOA mRNA Counts versus CDKN1B mRNA Counts

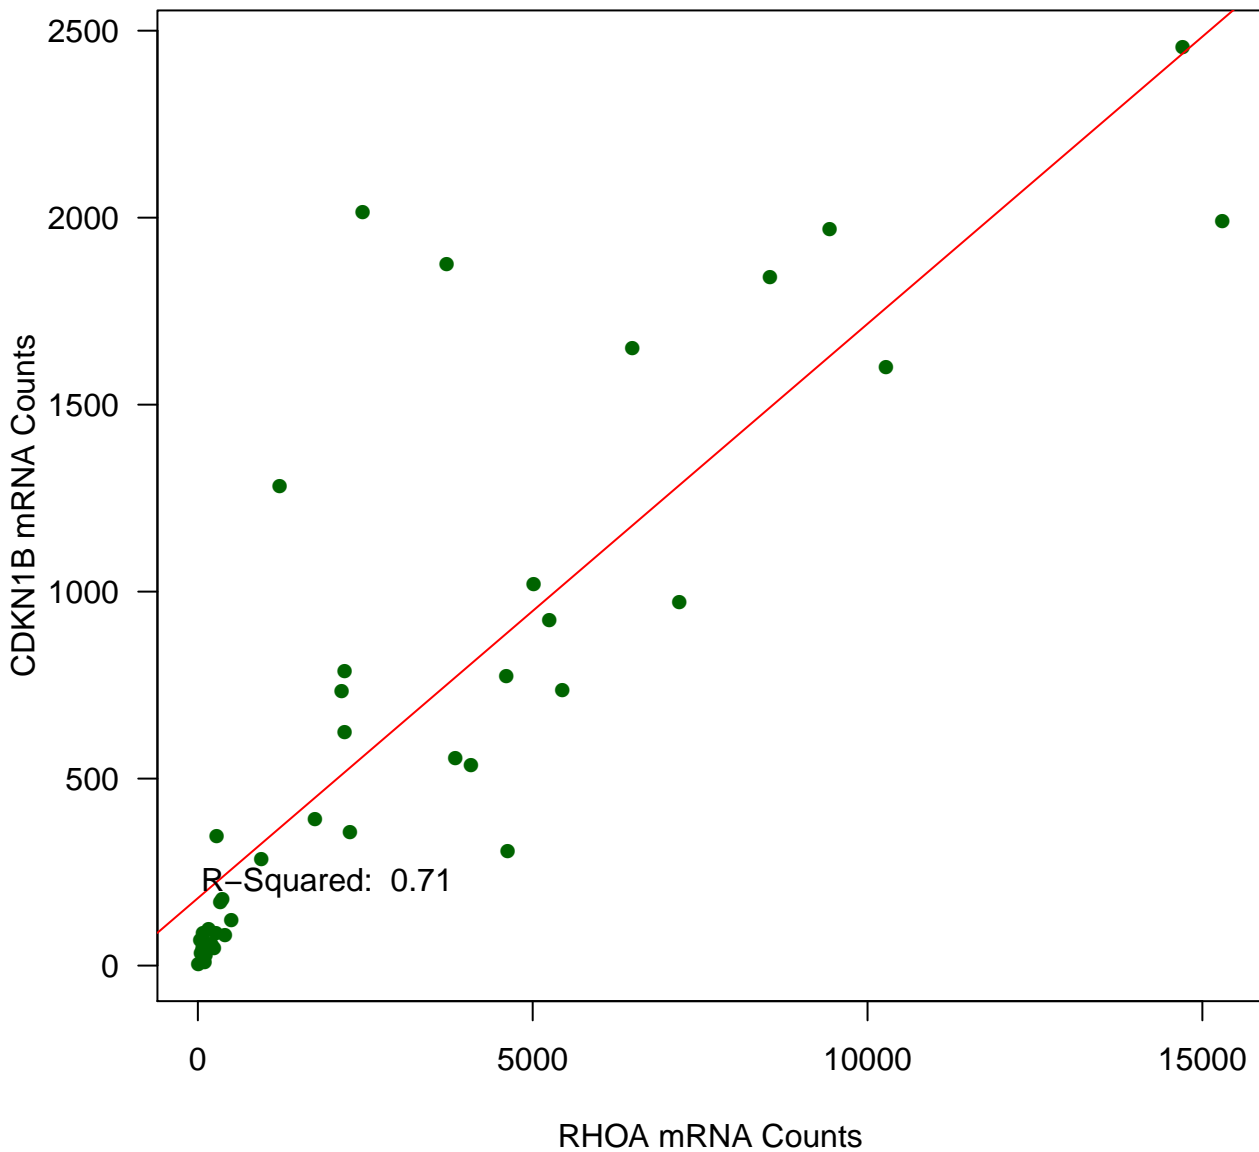

# SDCBP mRNA Counts versus CDKN1B mRNA Counts

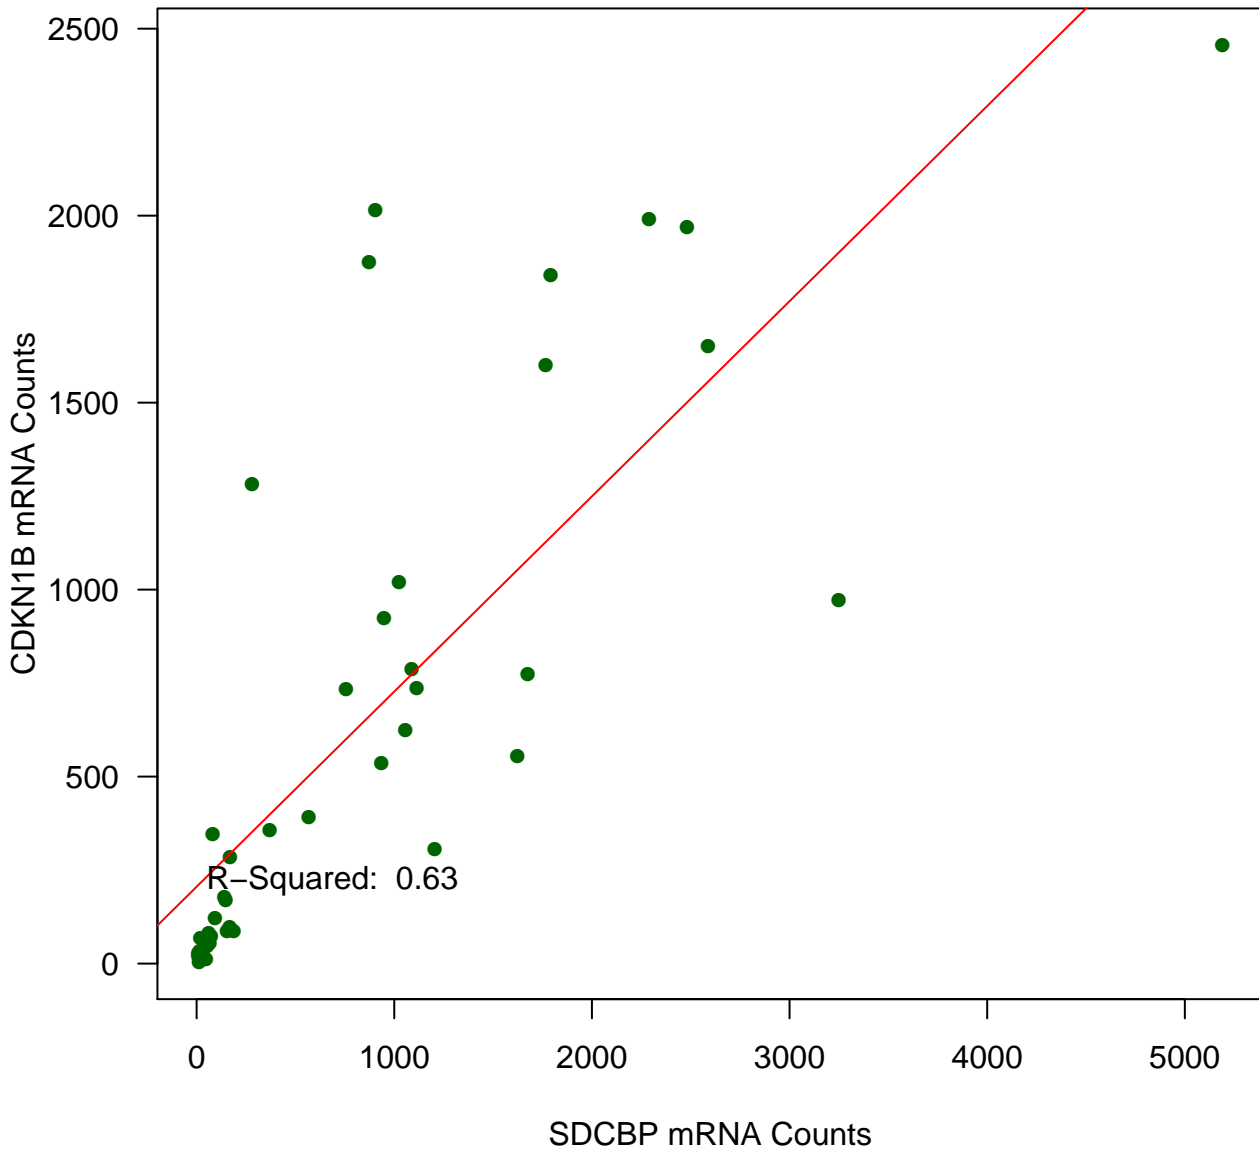

# CDK6 mRNA Counts versus CDKN1B mRNA Counts

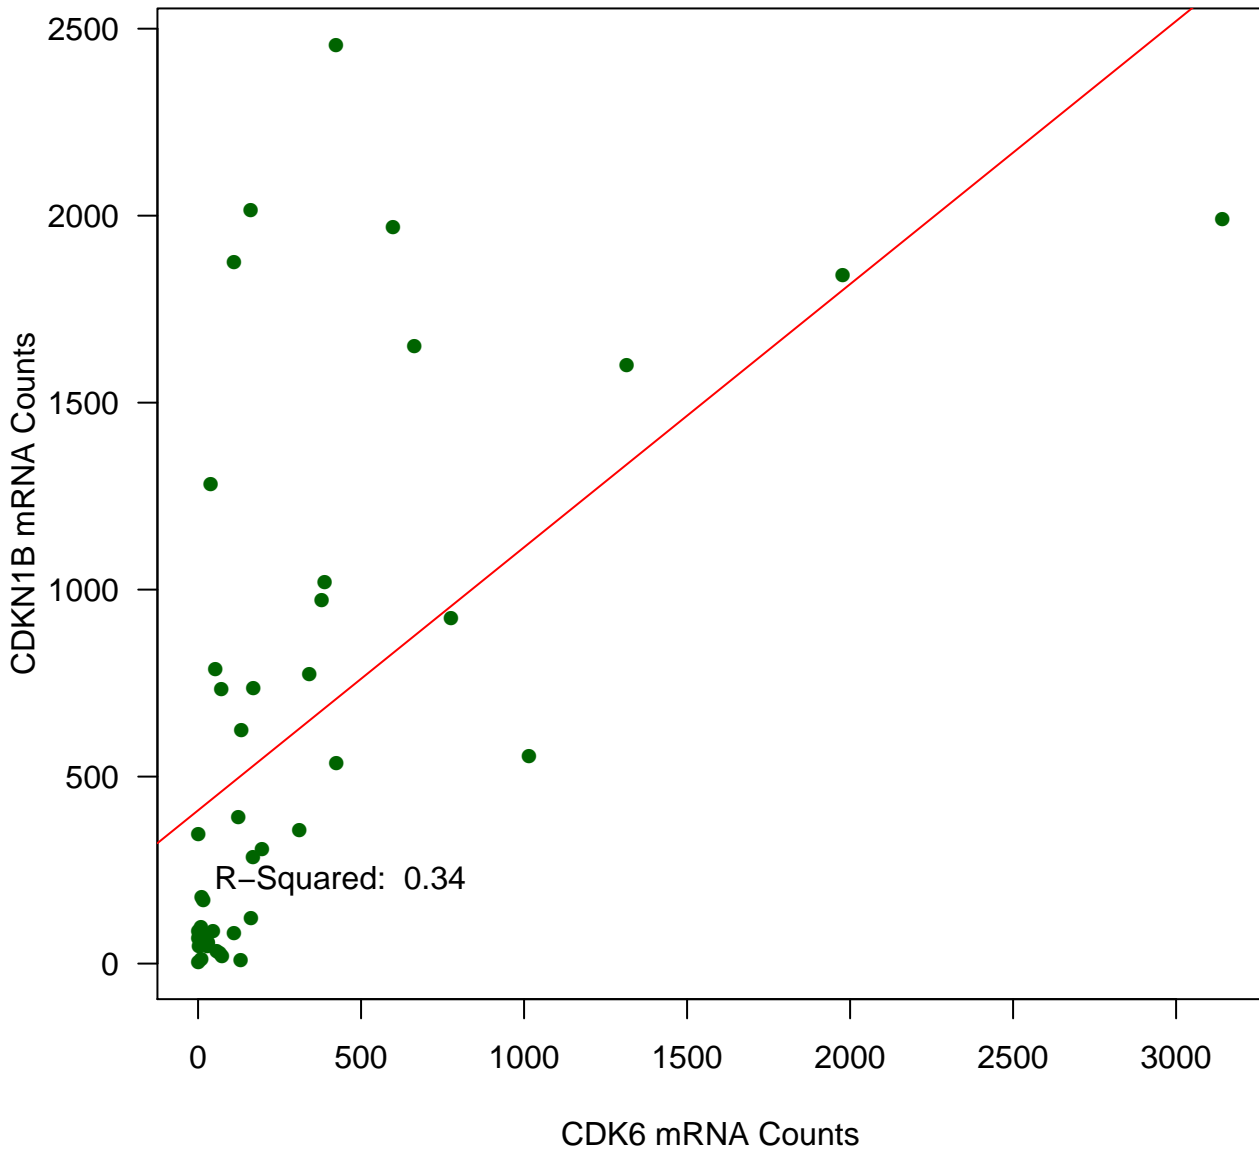

**TYMS mRNA Counts versus CDKN1B mRNA Counts**

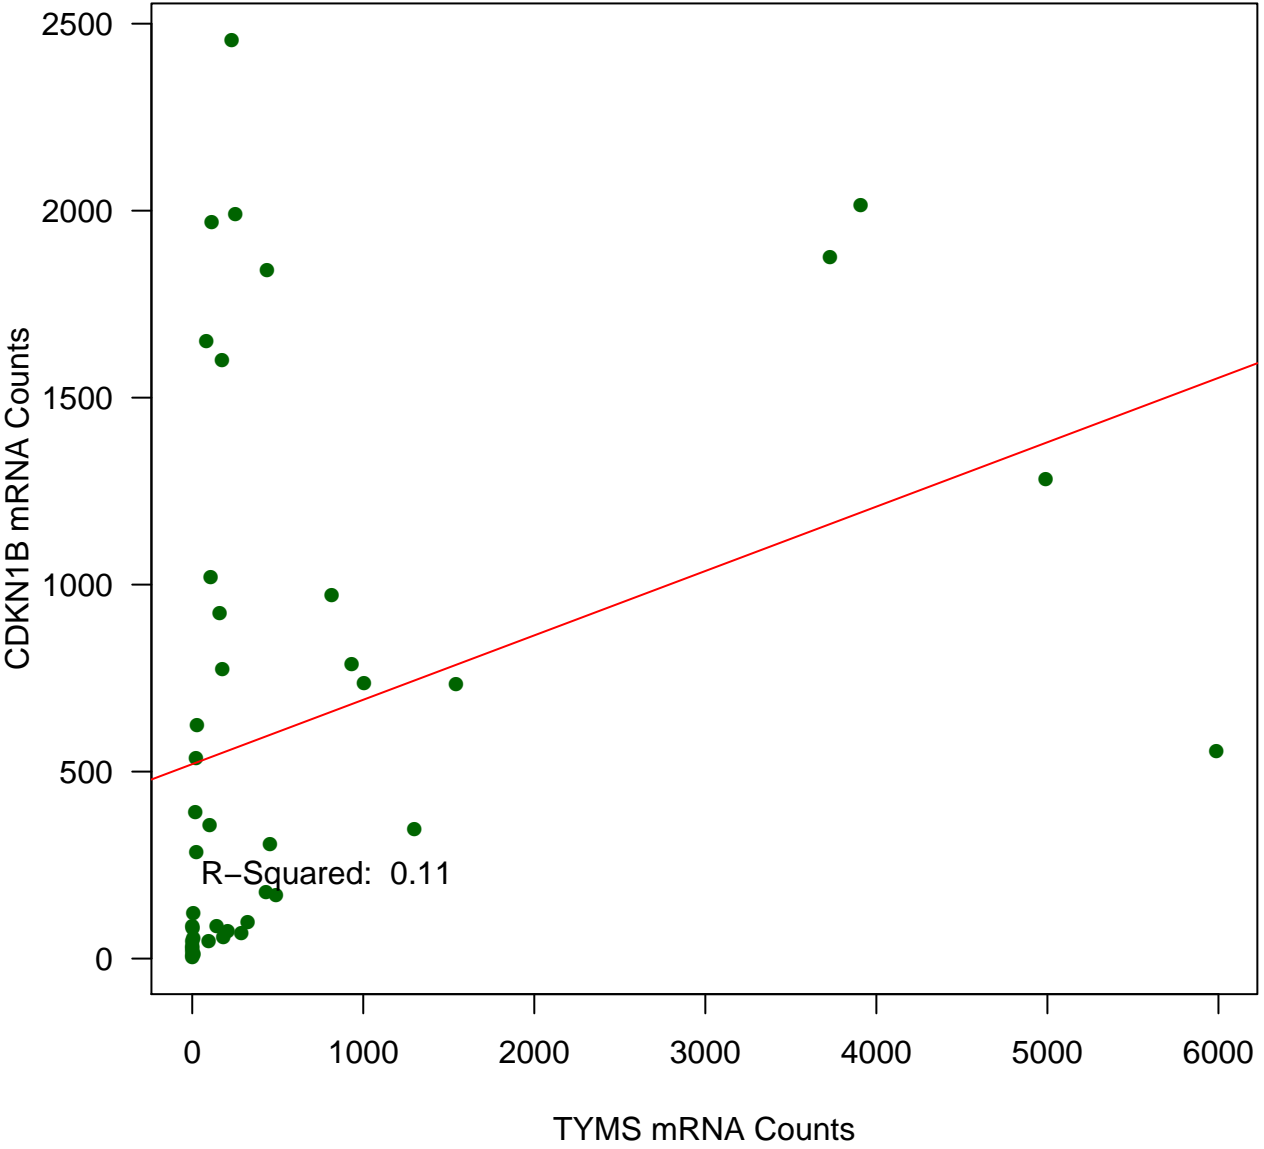



# LDHB mRNA Counts versus GRB2 mRNA Counts

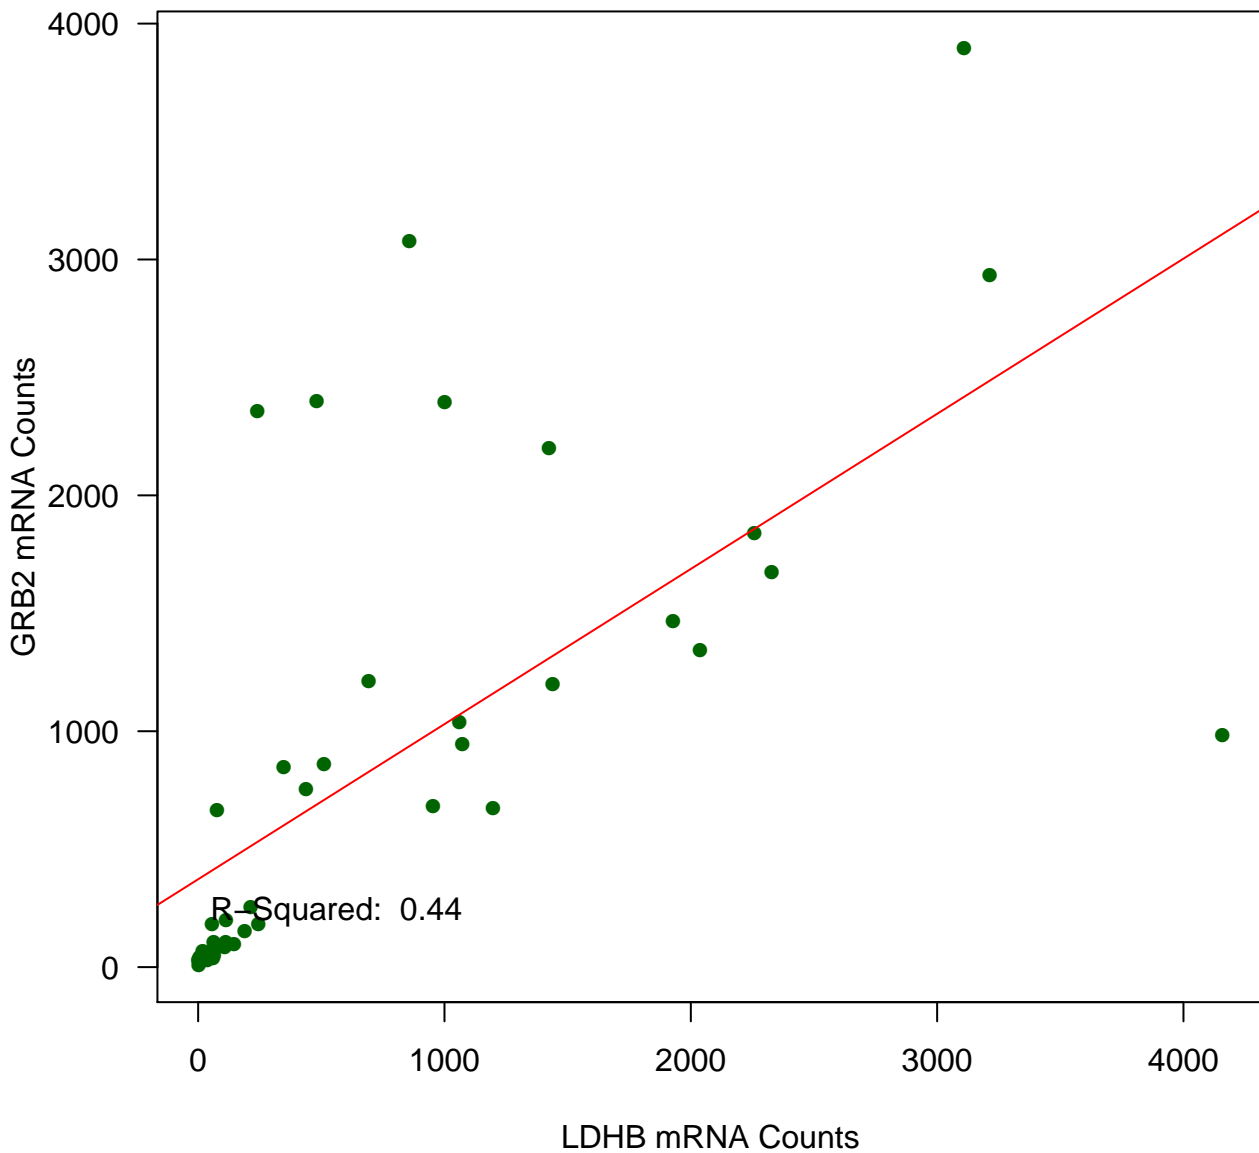

# PNN mRNA Counts versus GRB2 mRNA Counts

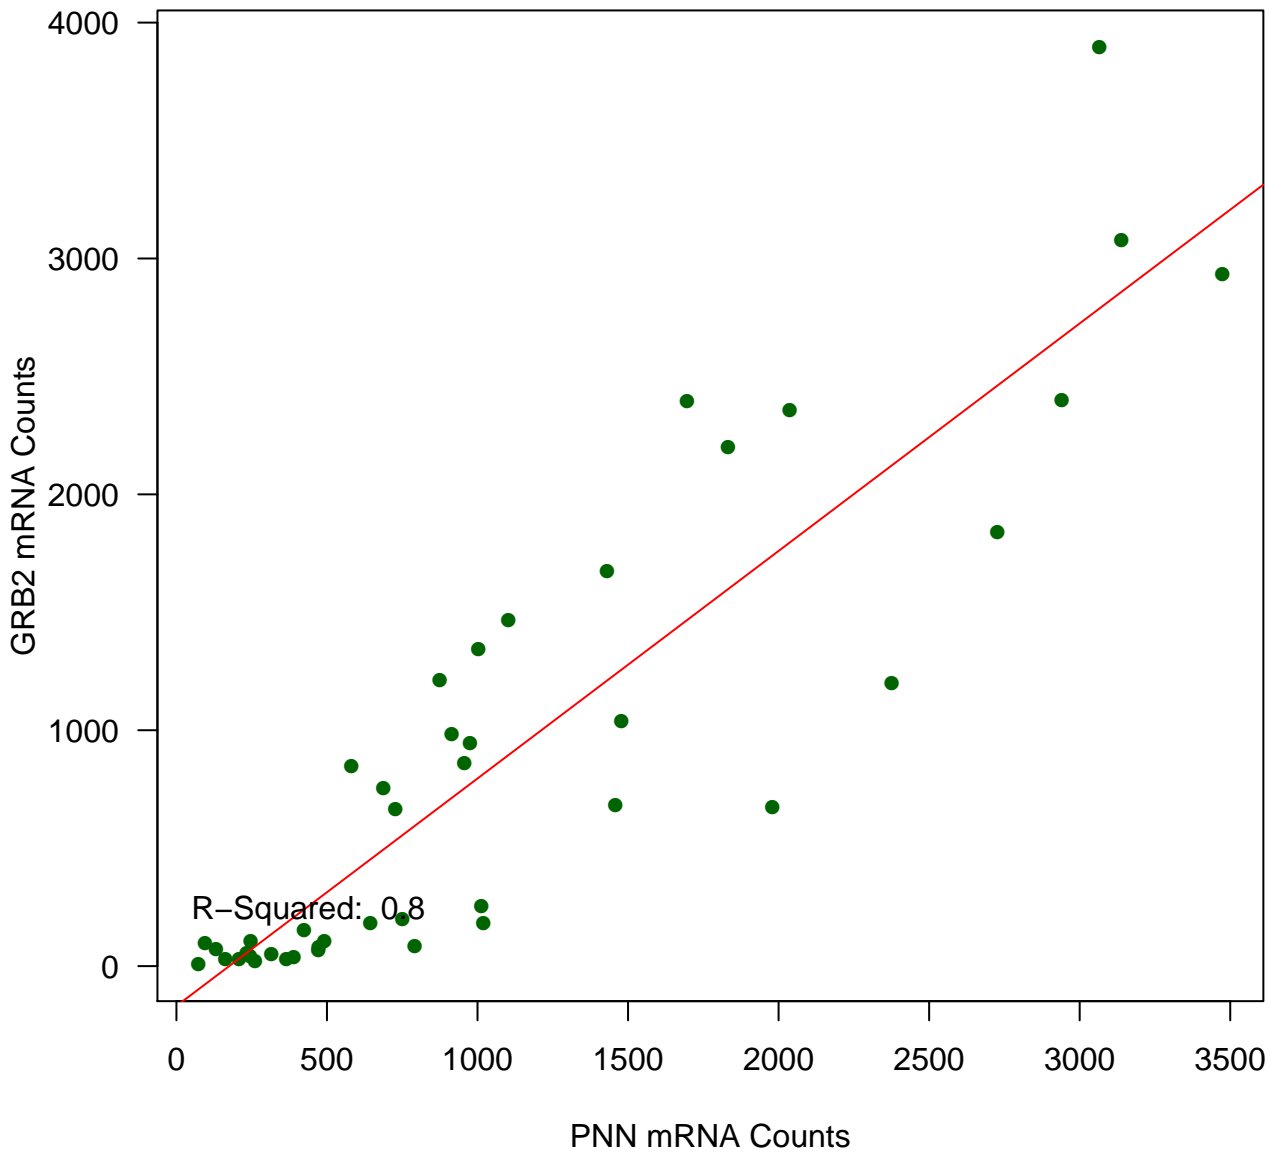

# RHOA mRNA Counts versus GRB2 mRNA Counts

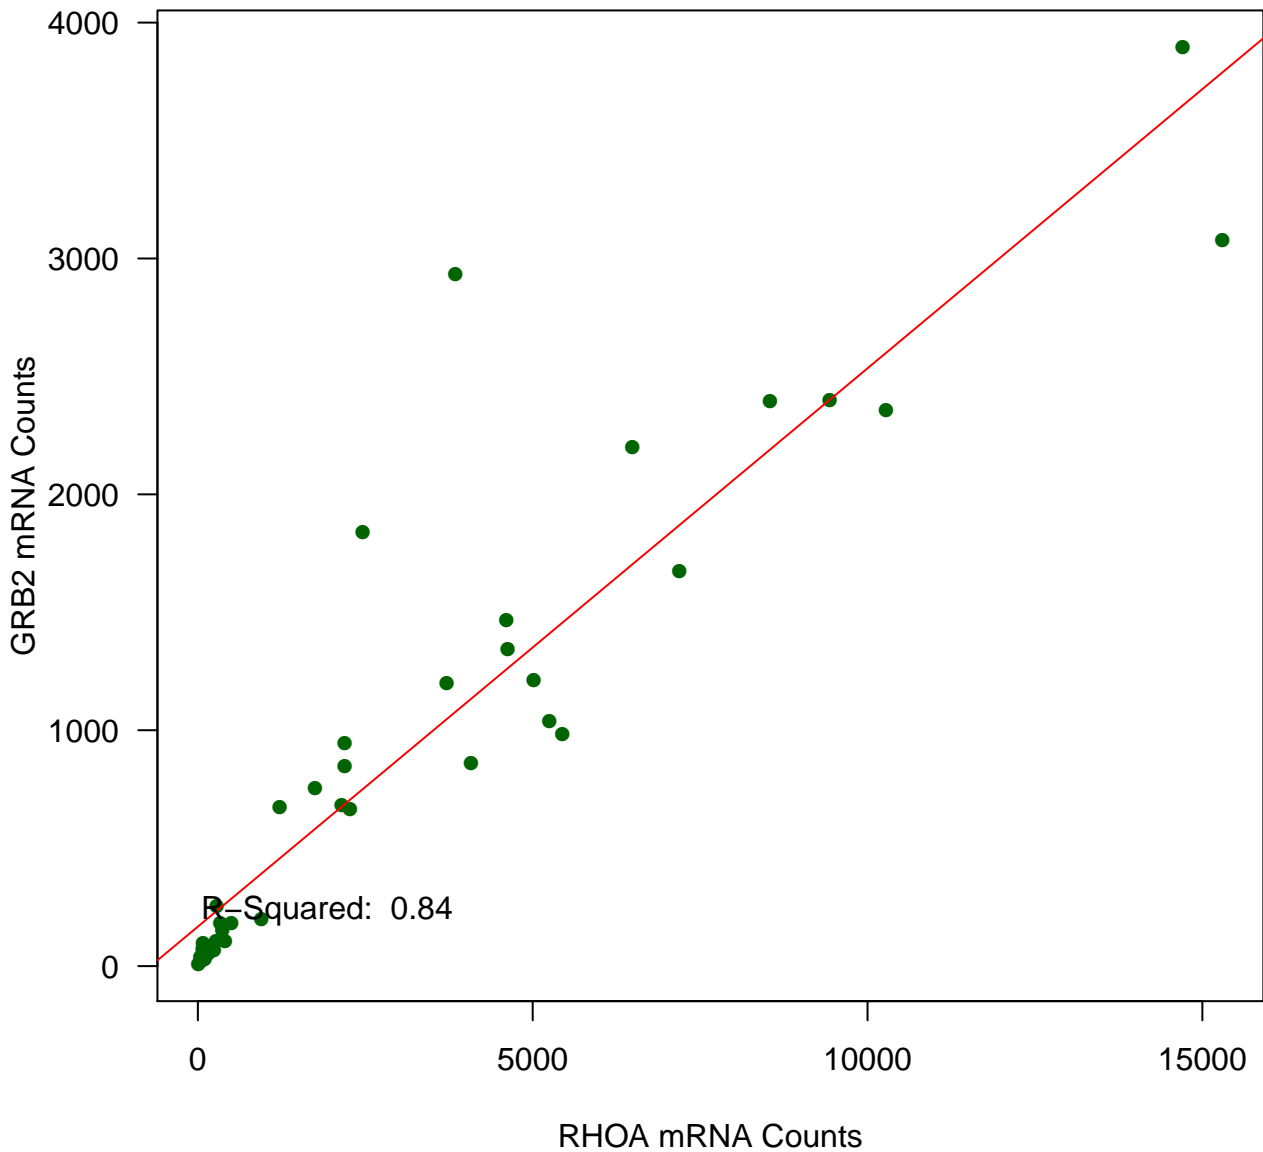

# SDCBP mRNA Counts versus GRB2 mRNA Counts

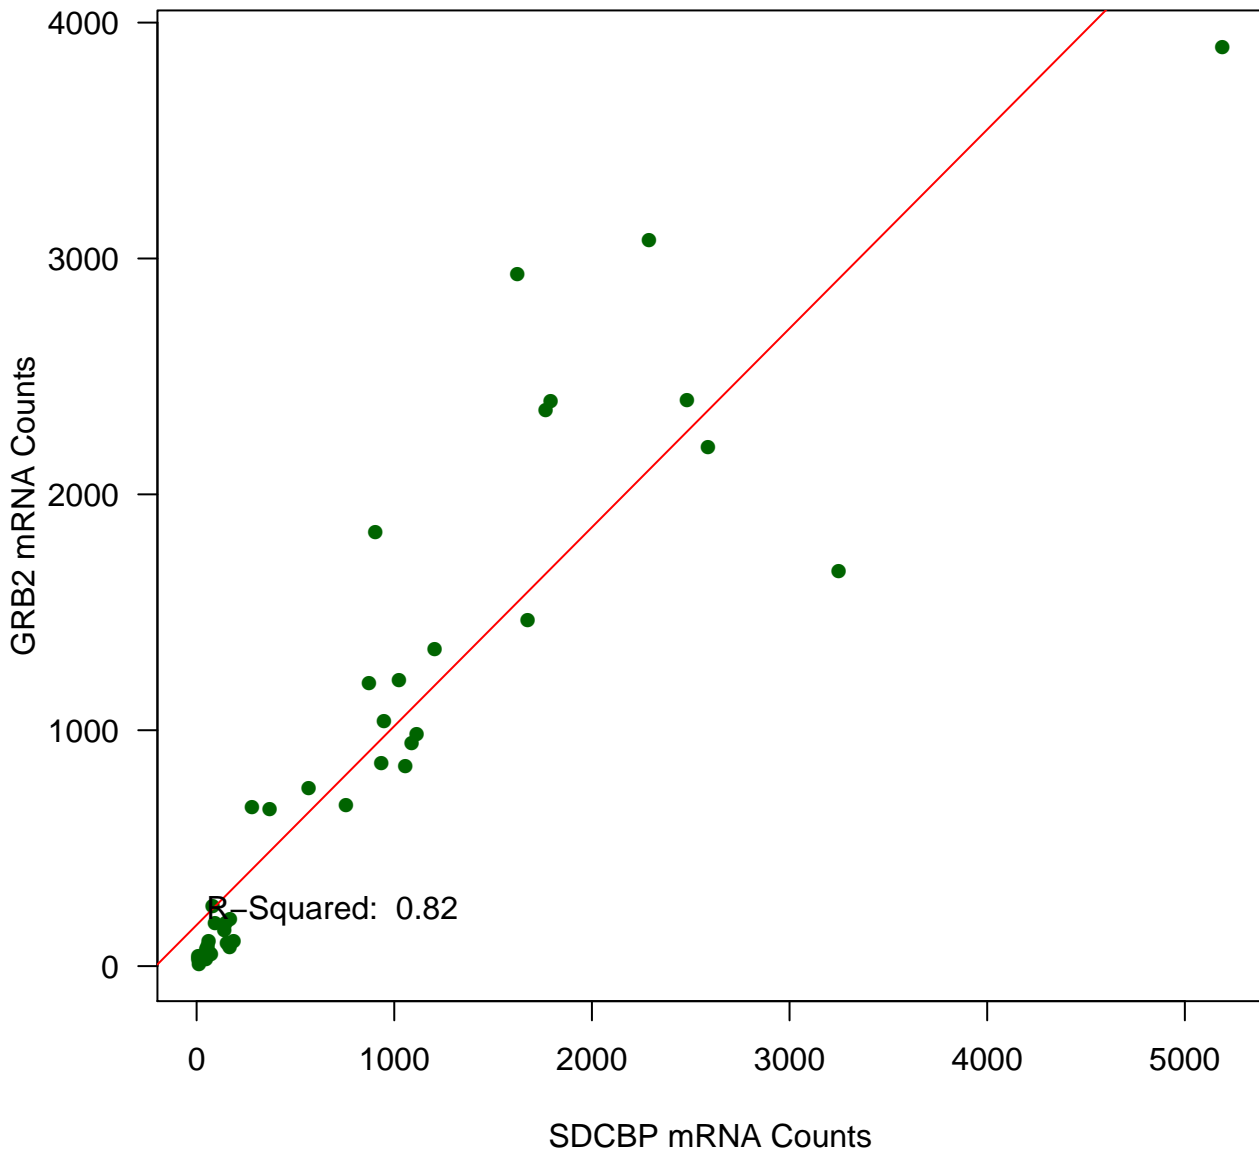

# CDK6 mRNA Counts versus GRB2 mRNA Counts

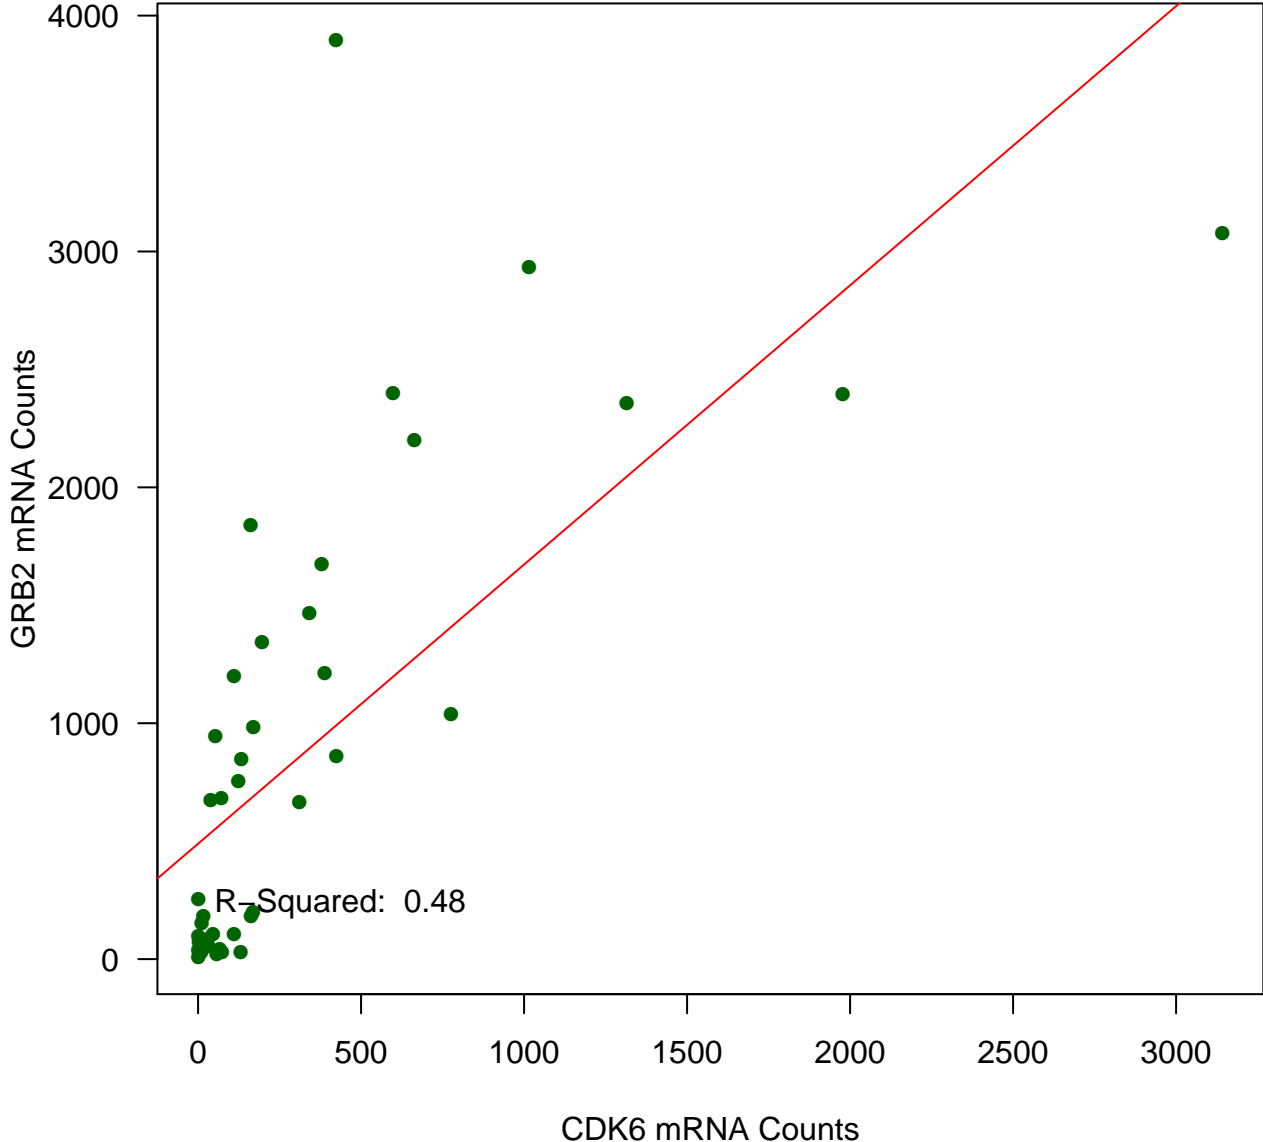

# TYMS mRNA Counts versus GRB2 mRNA Counts

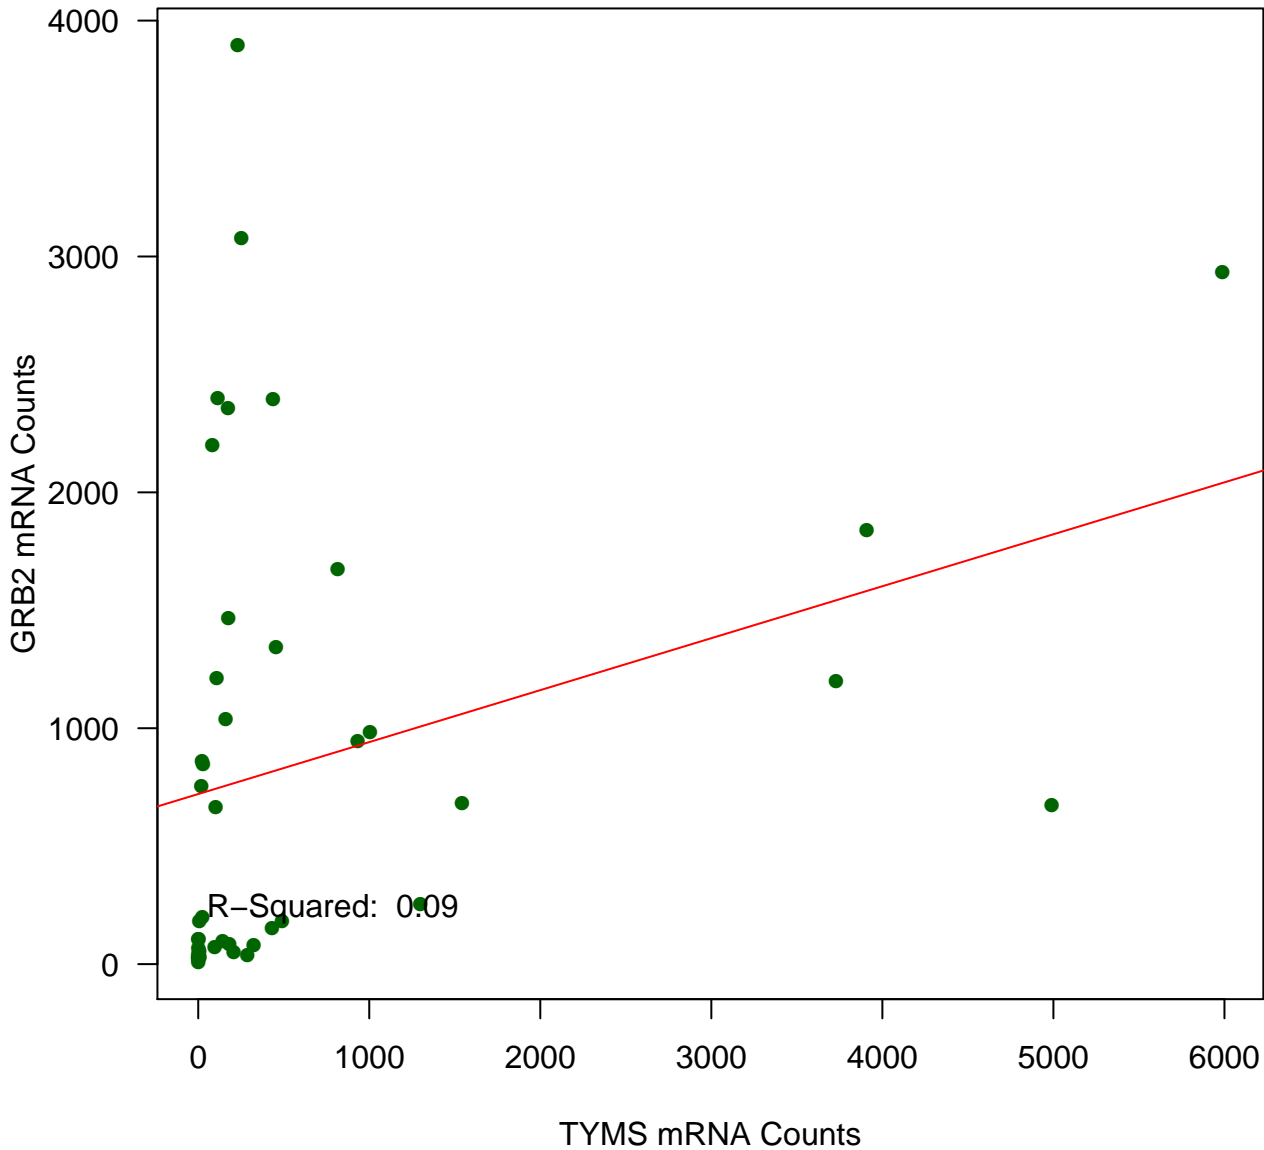

# PNN mRNA Counts versus LDHB mRNA Counts

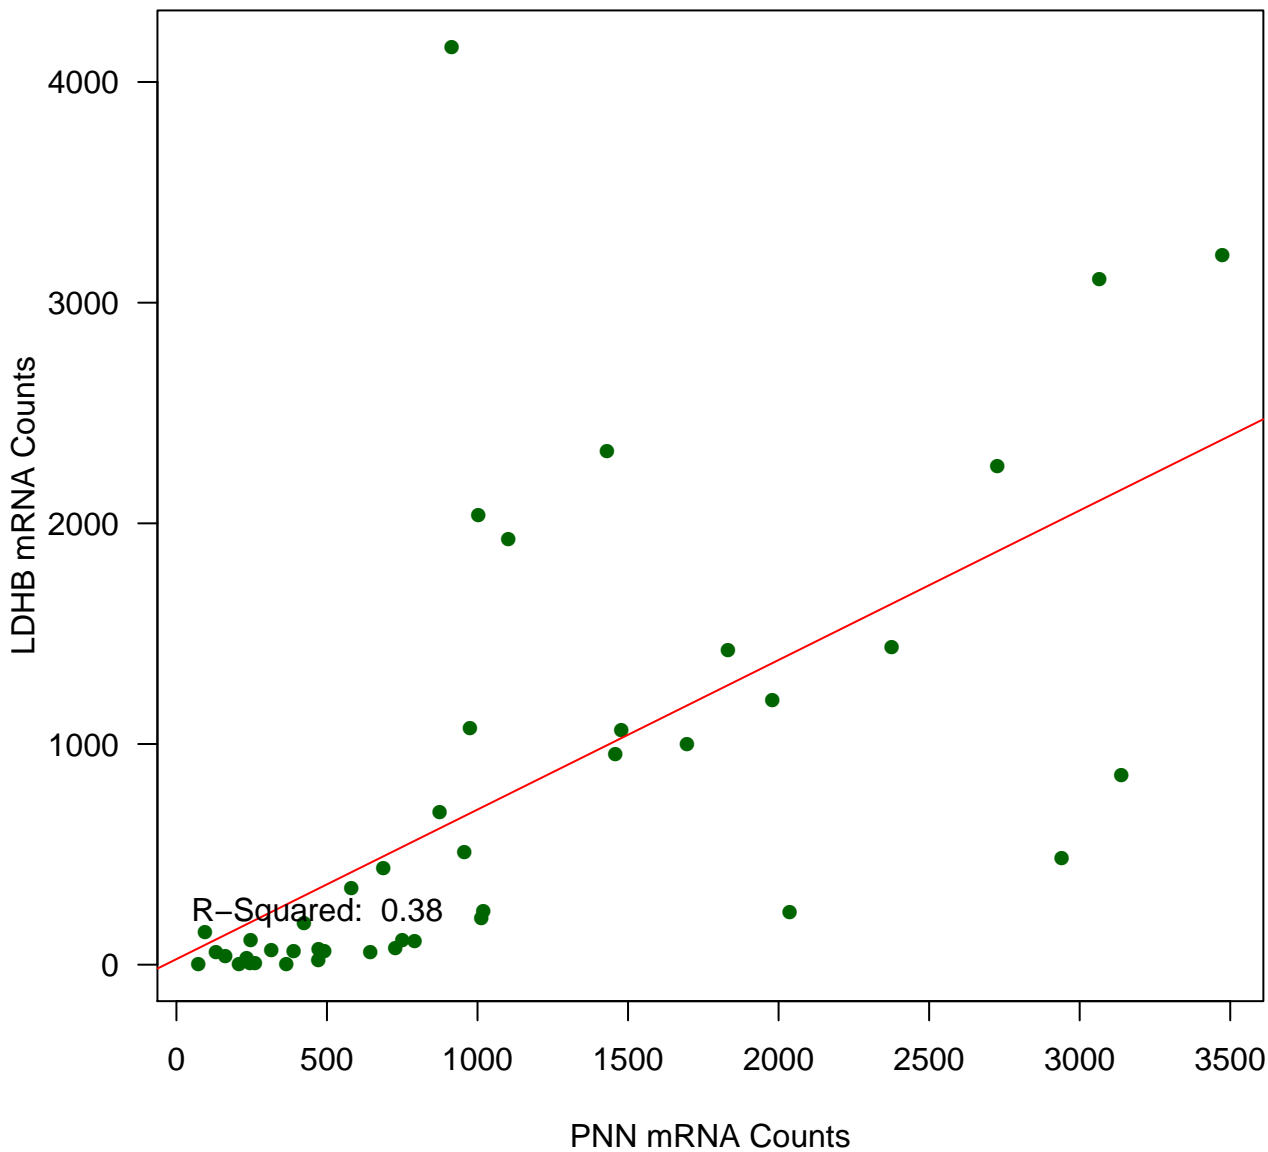

# RHOA mRNA Counts versus LDHB mRNA Counts

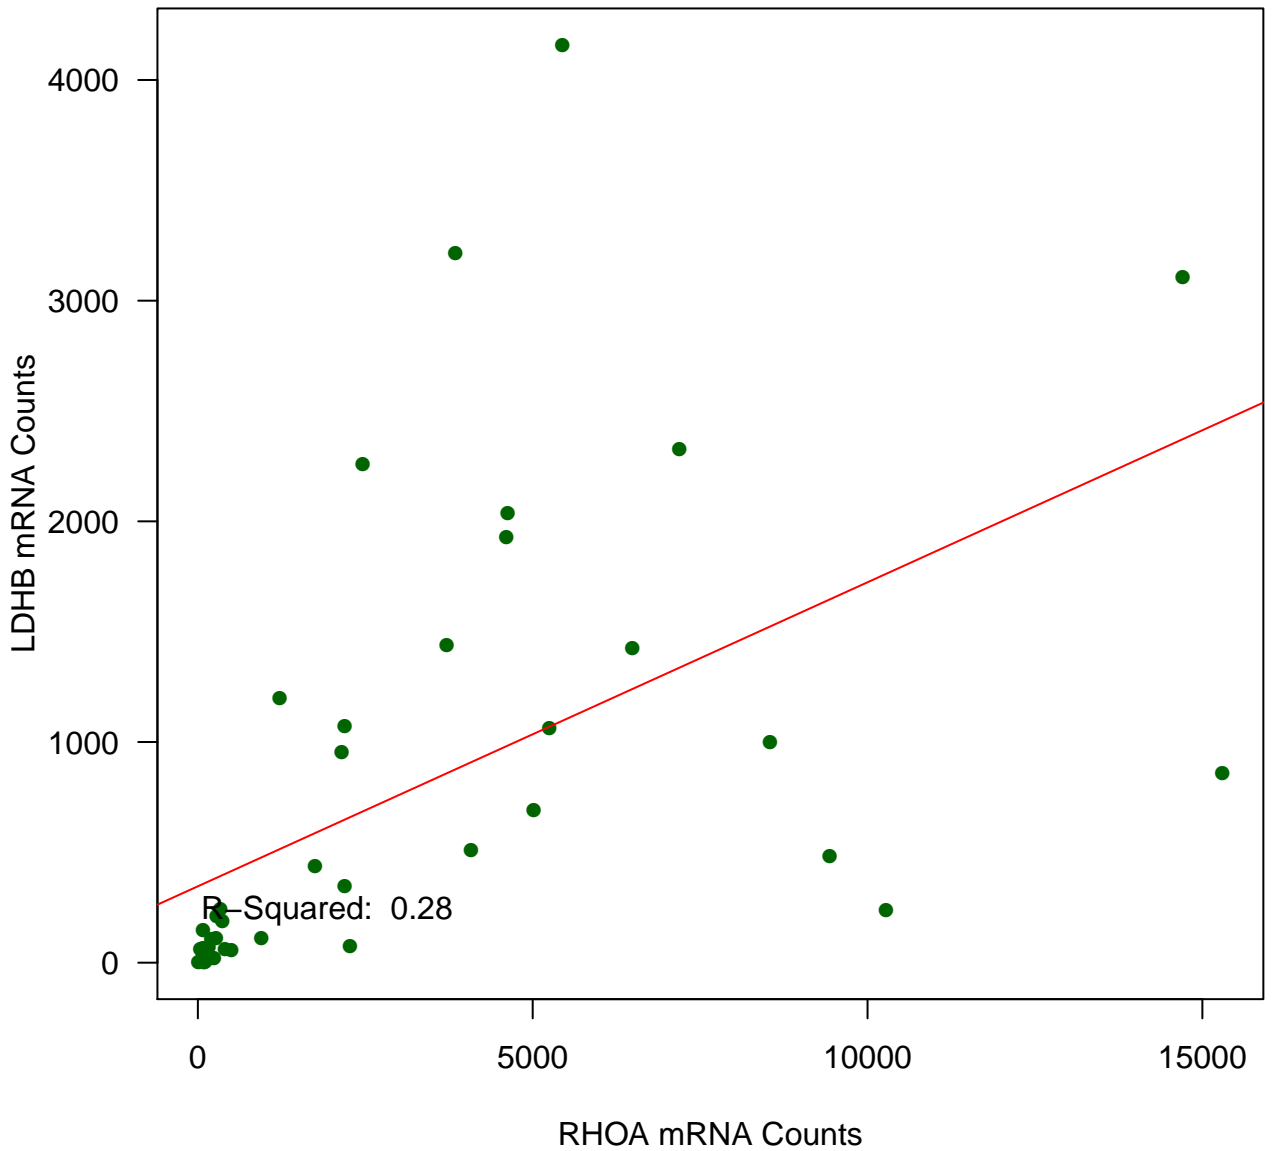



# SDCBP mRNA Counts versus LDHB mRNA Counts

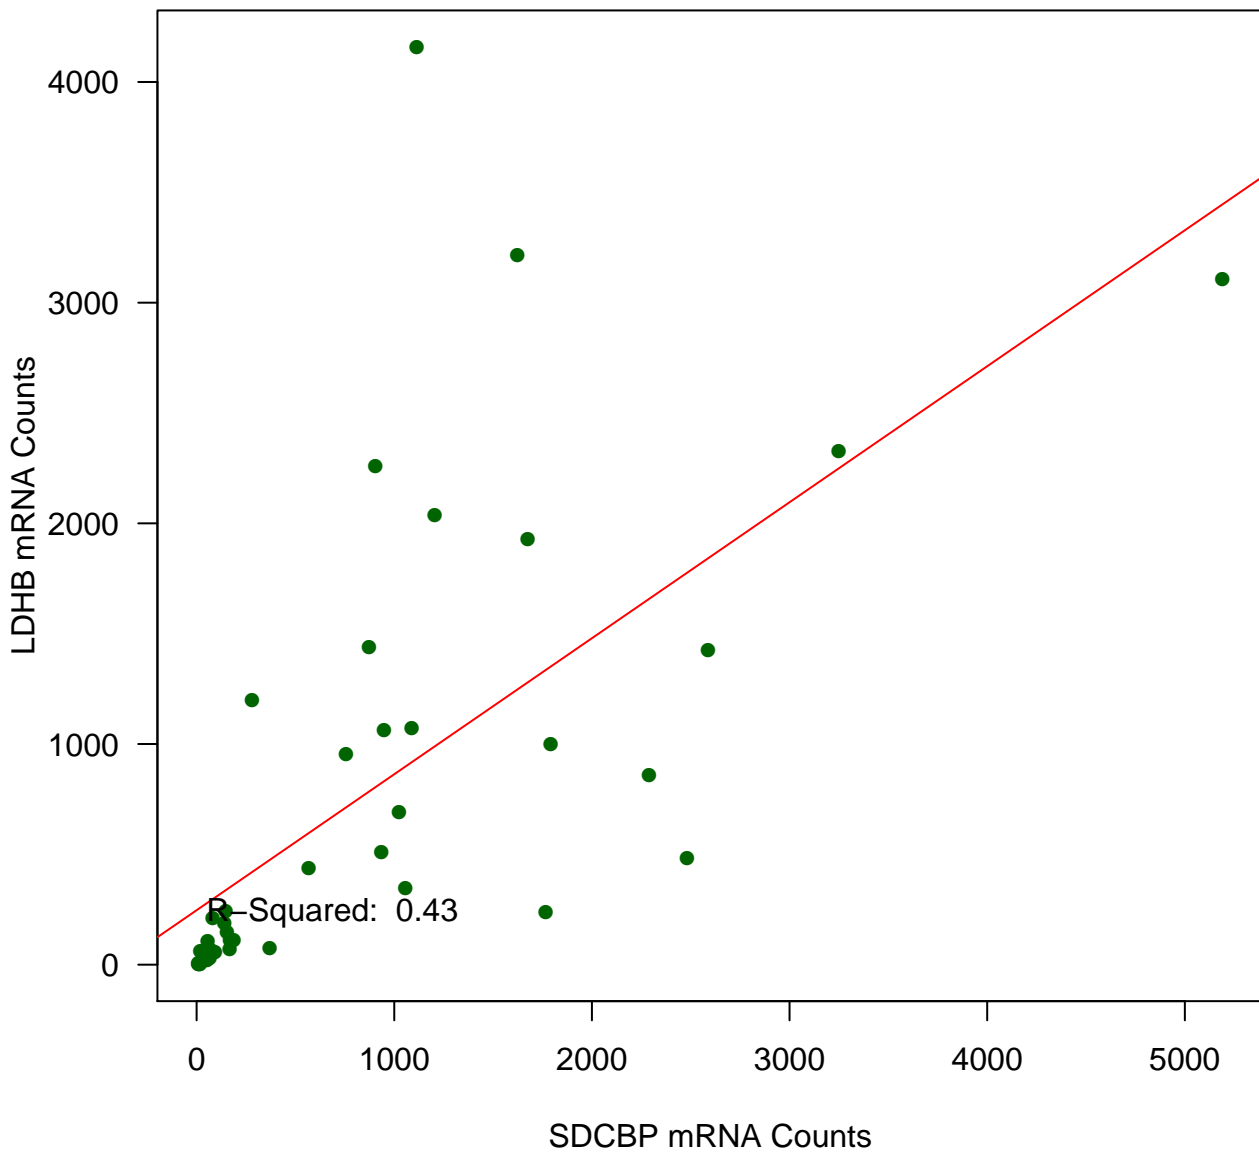

# CDK6 mRNA Counts versus LDHB mRNA Counts

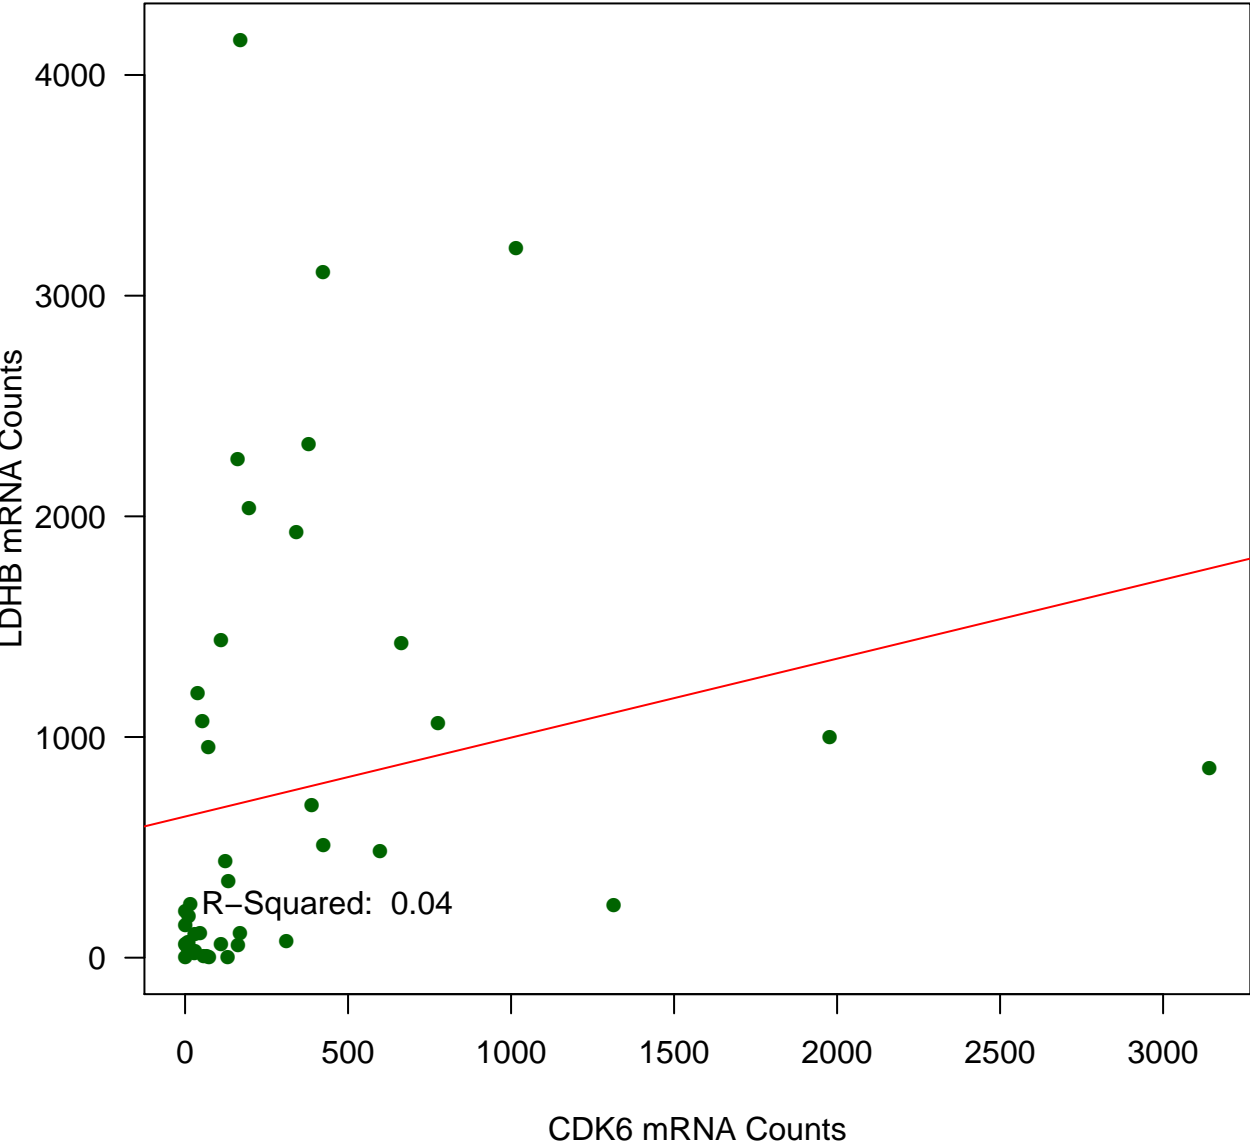

# TYMS mRNA Counts versus LDHB mRNA Counts

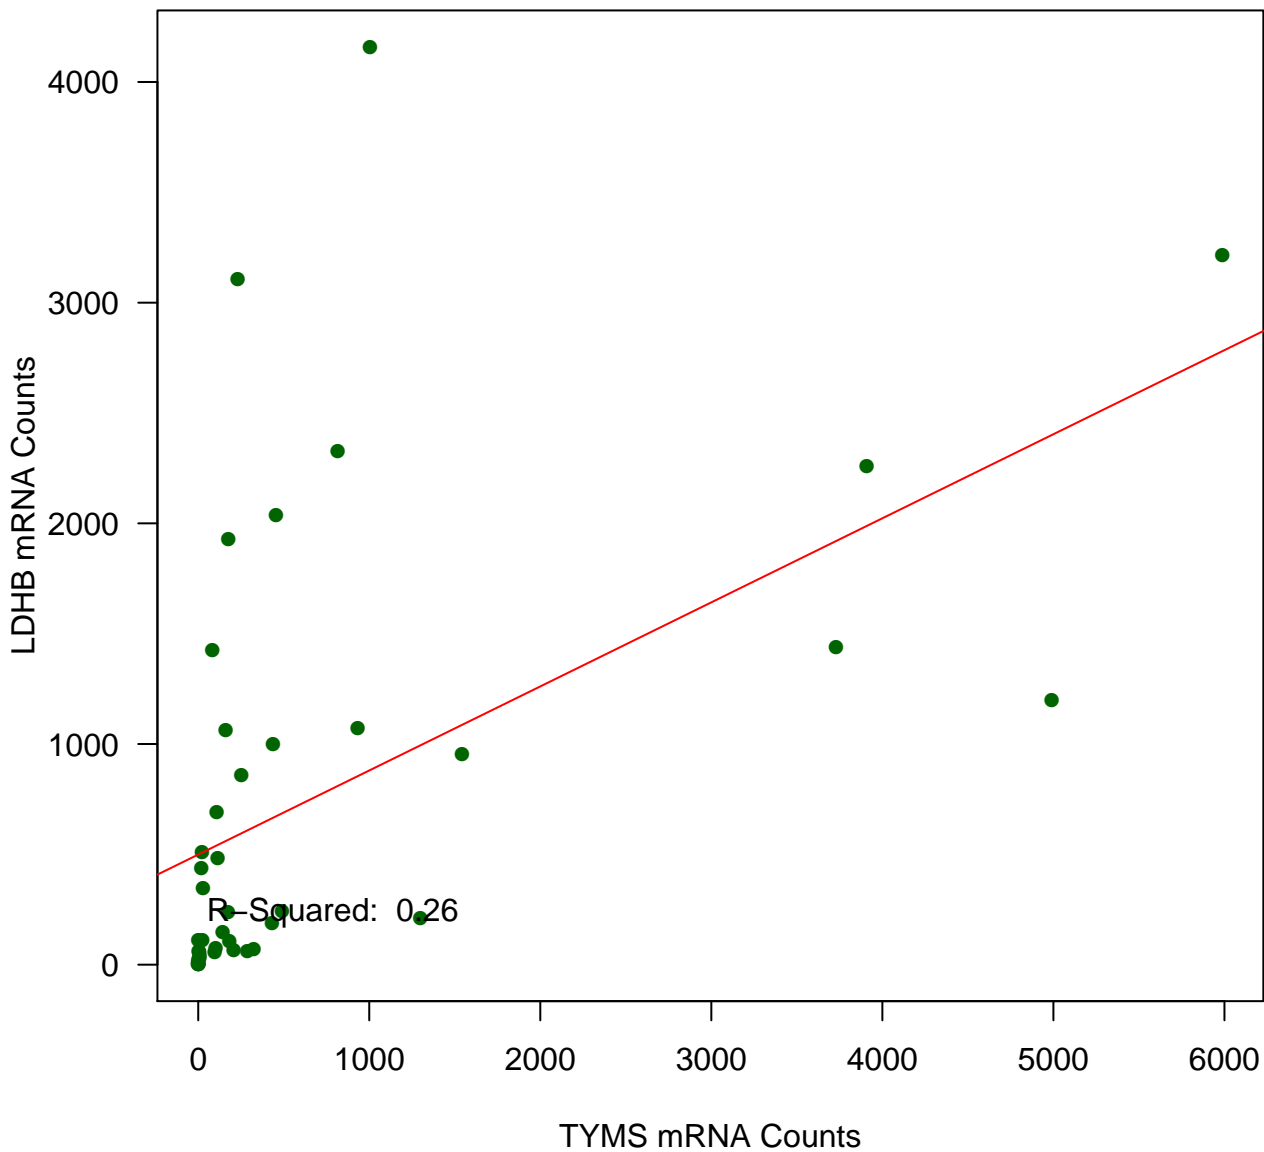

# RHOA mRNA Counts versus PNN mRNA Counts

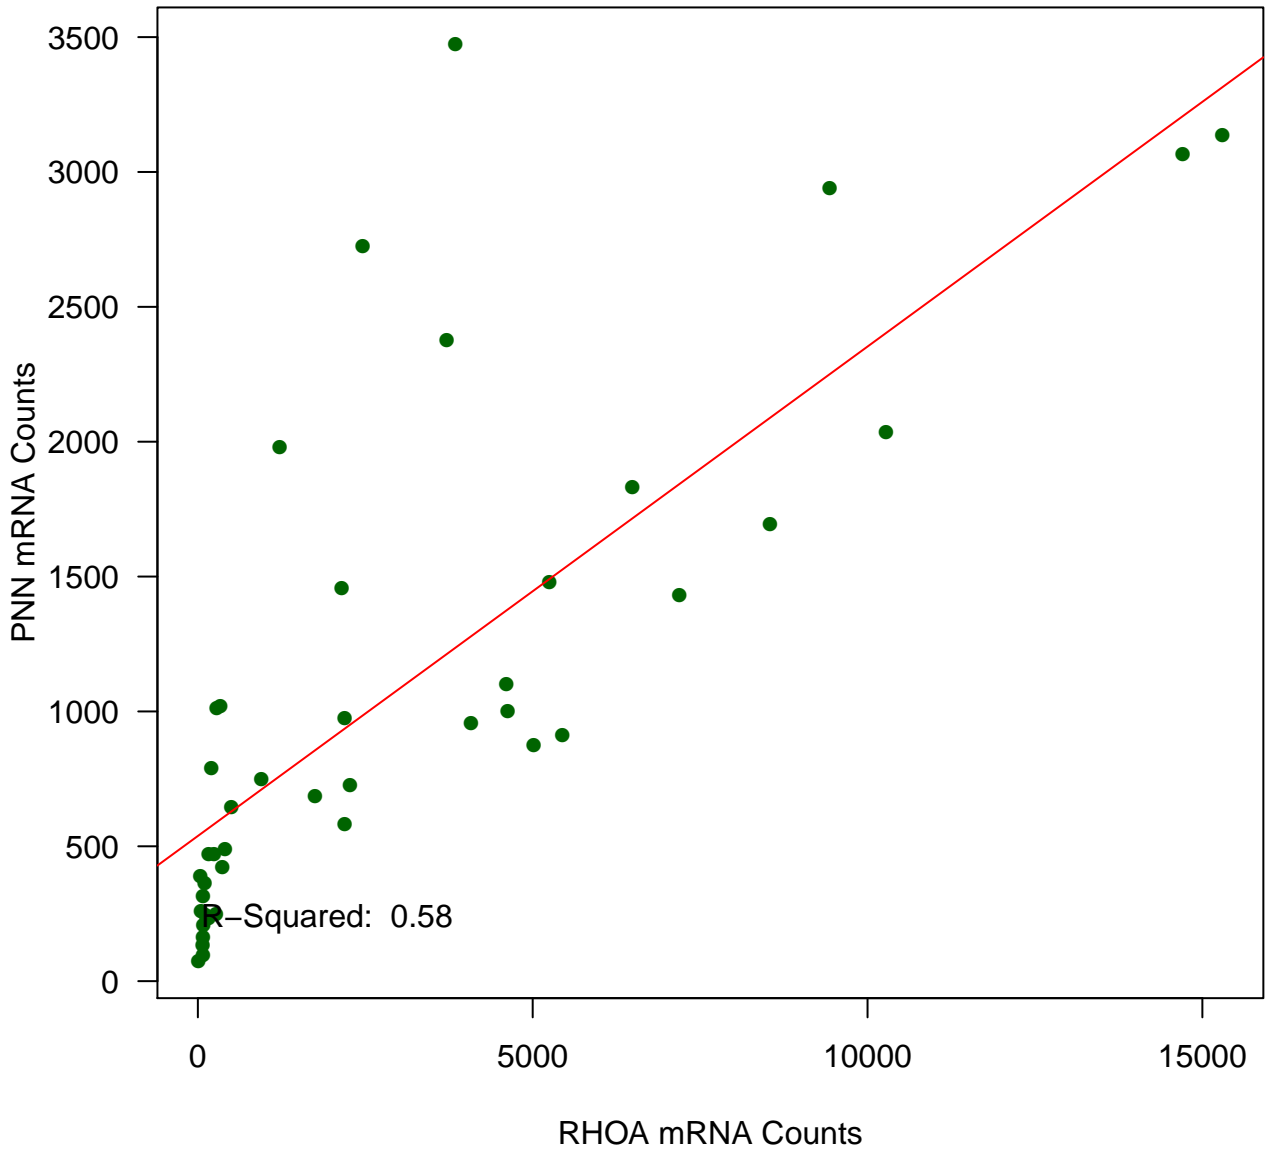

# SDCBP mRNA Counts versus PNN mRNA Counts

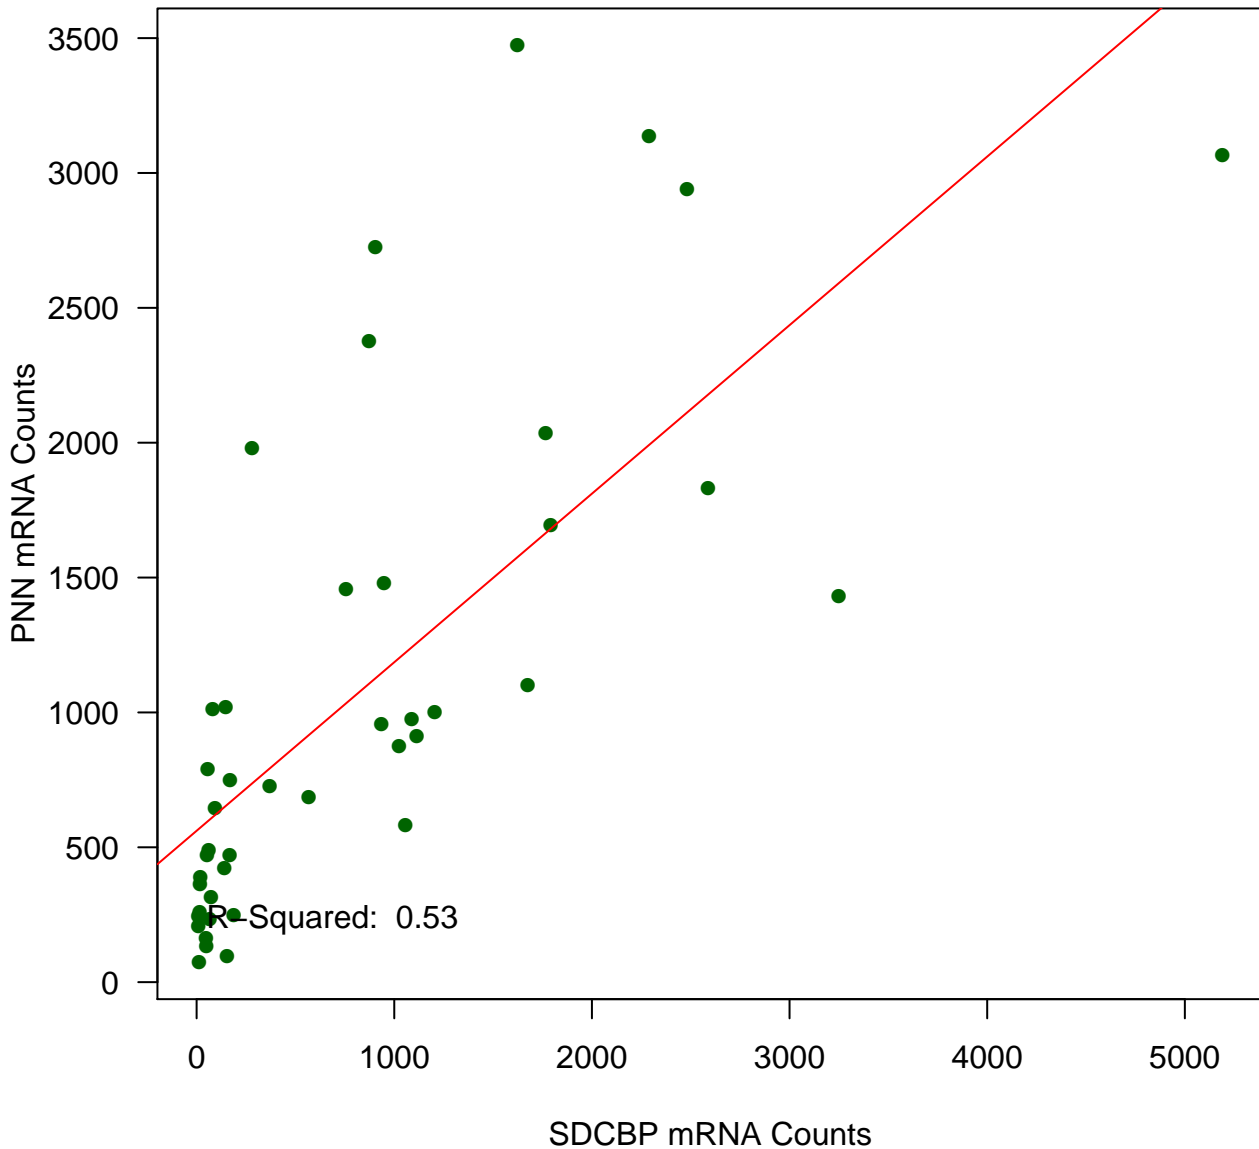

# CDK6 mRNA Counts versus PNN mRNA Counts

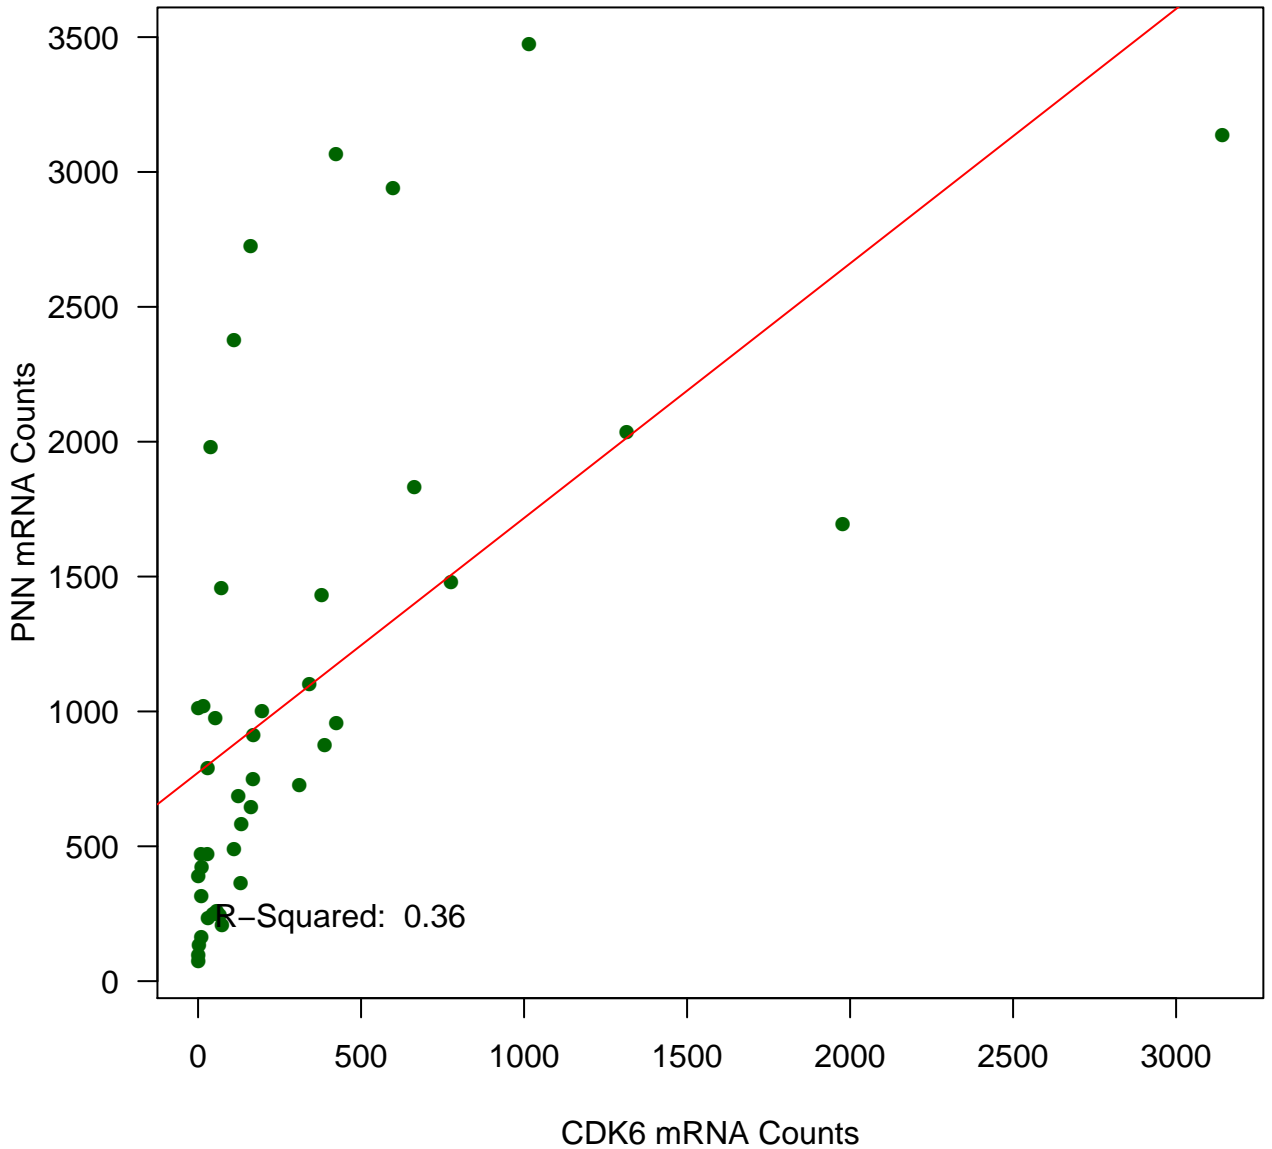

# TYMS mRNA Counts versus PNN mRNA Counts

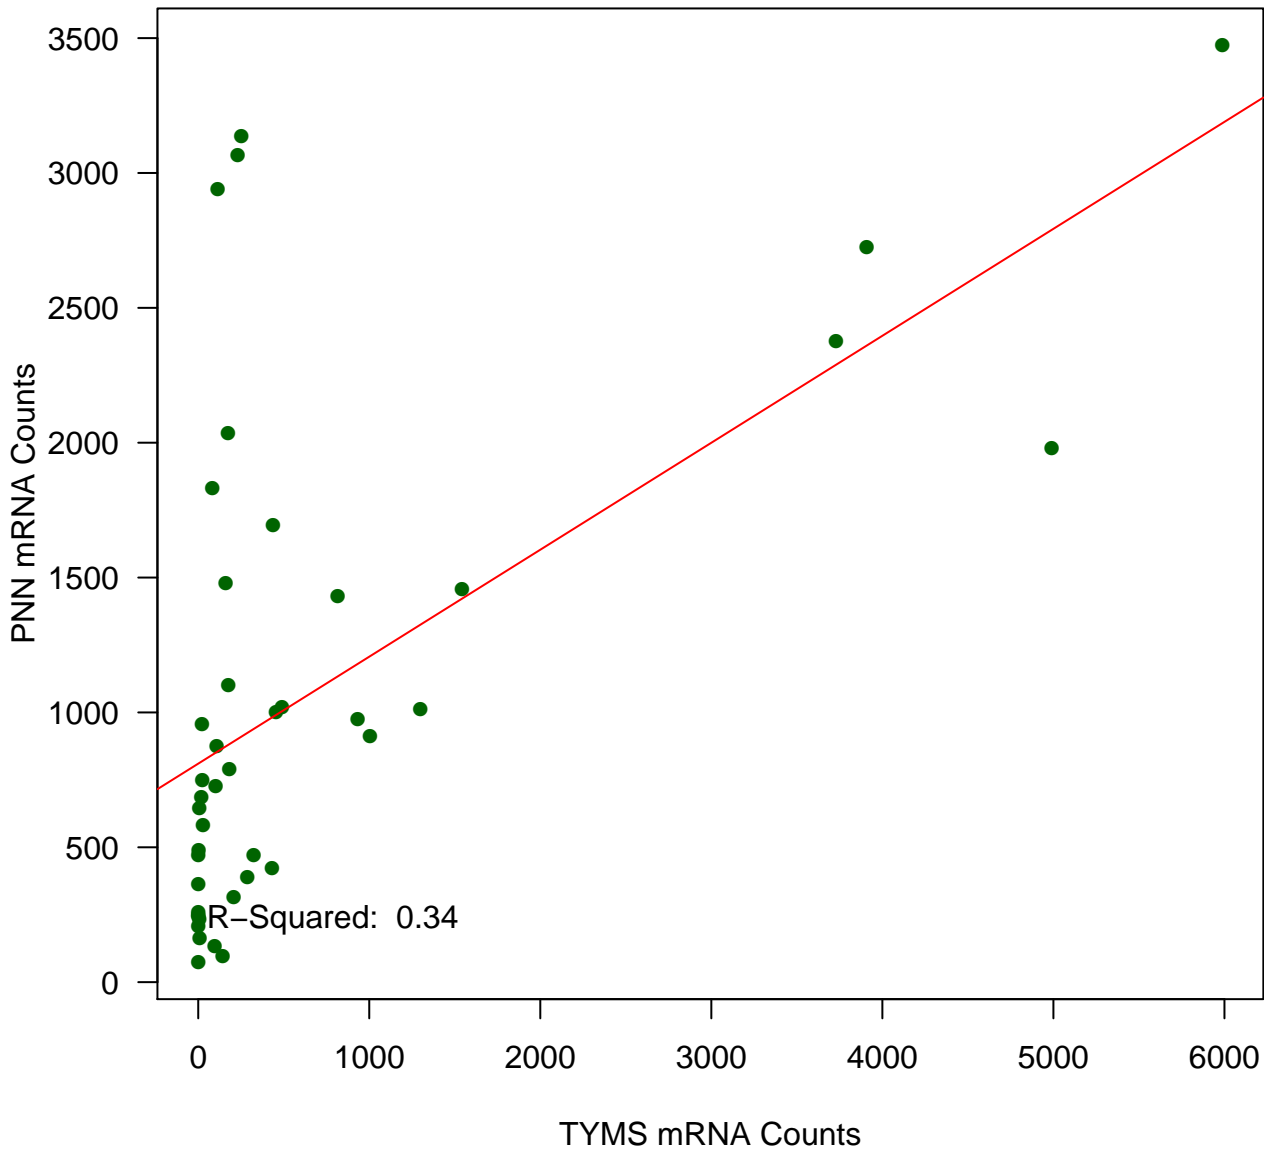

# SDCBP mRNA Counts versus RHOA mRNA Counts

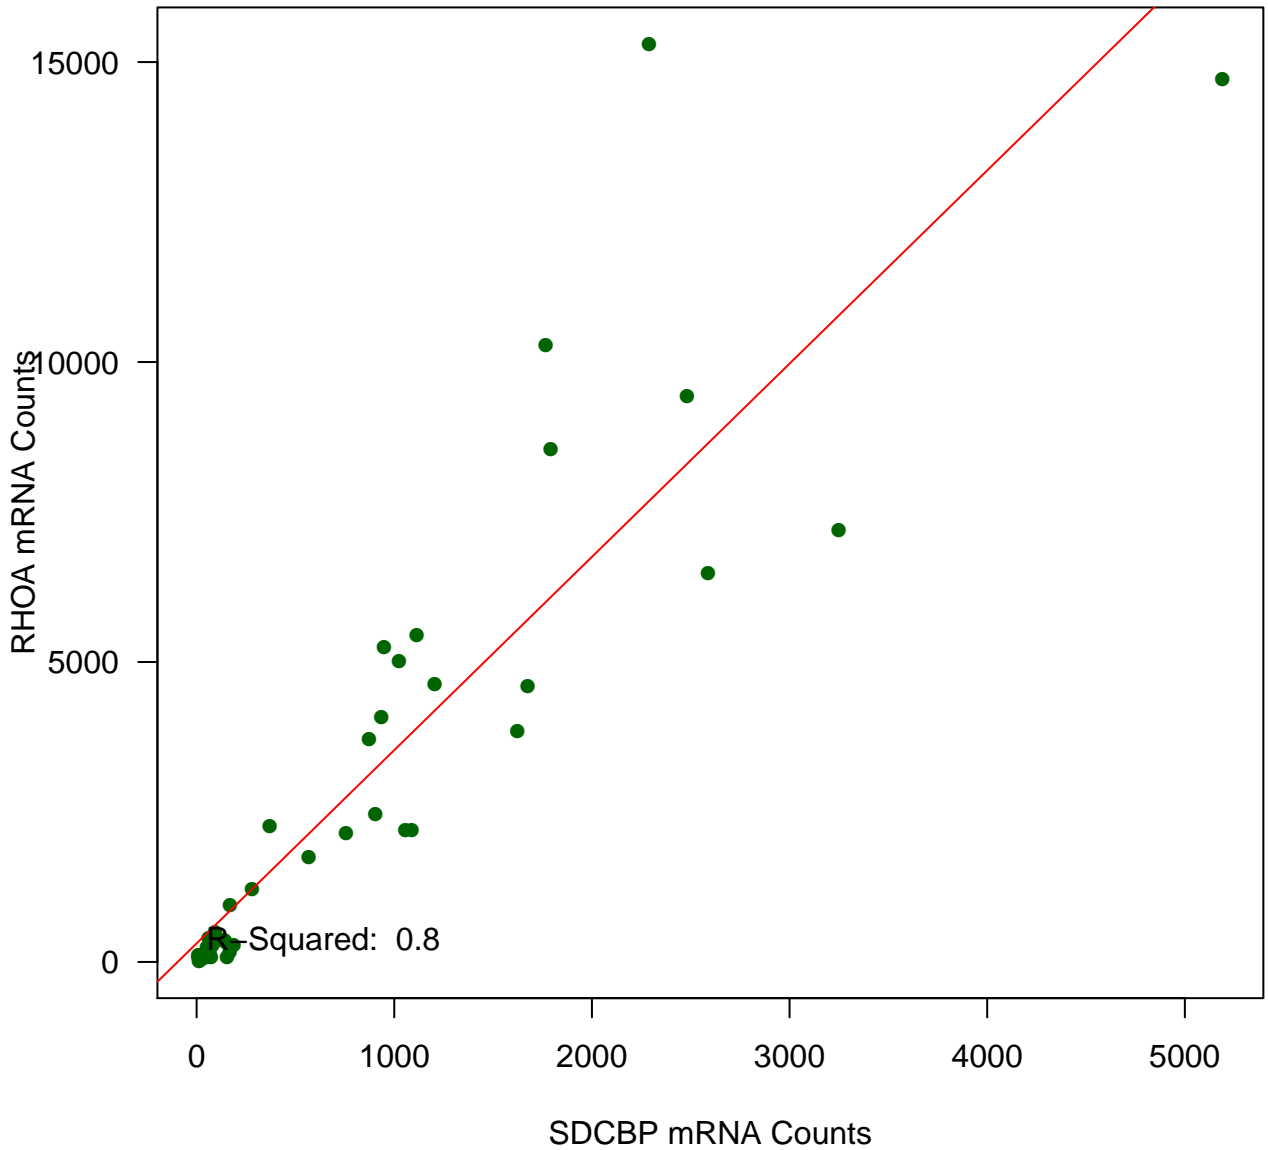



# CDK6 mRNA Counts versus RHOA mRNA Counts

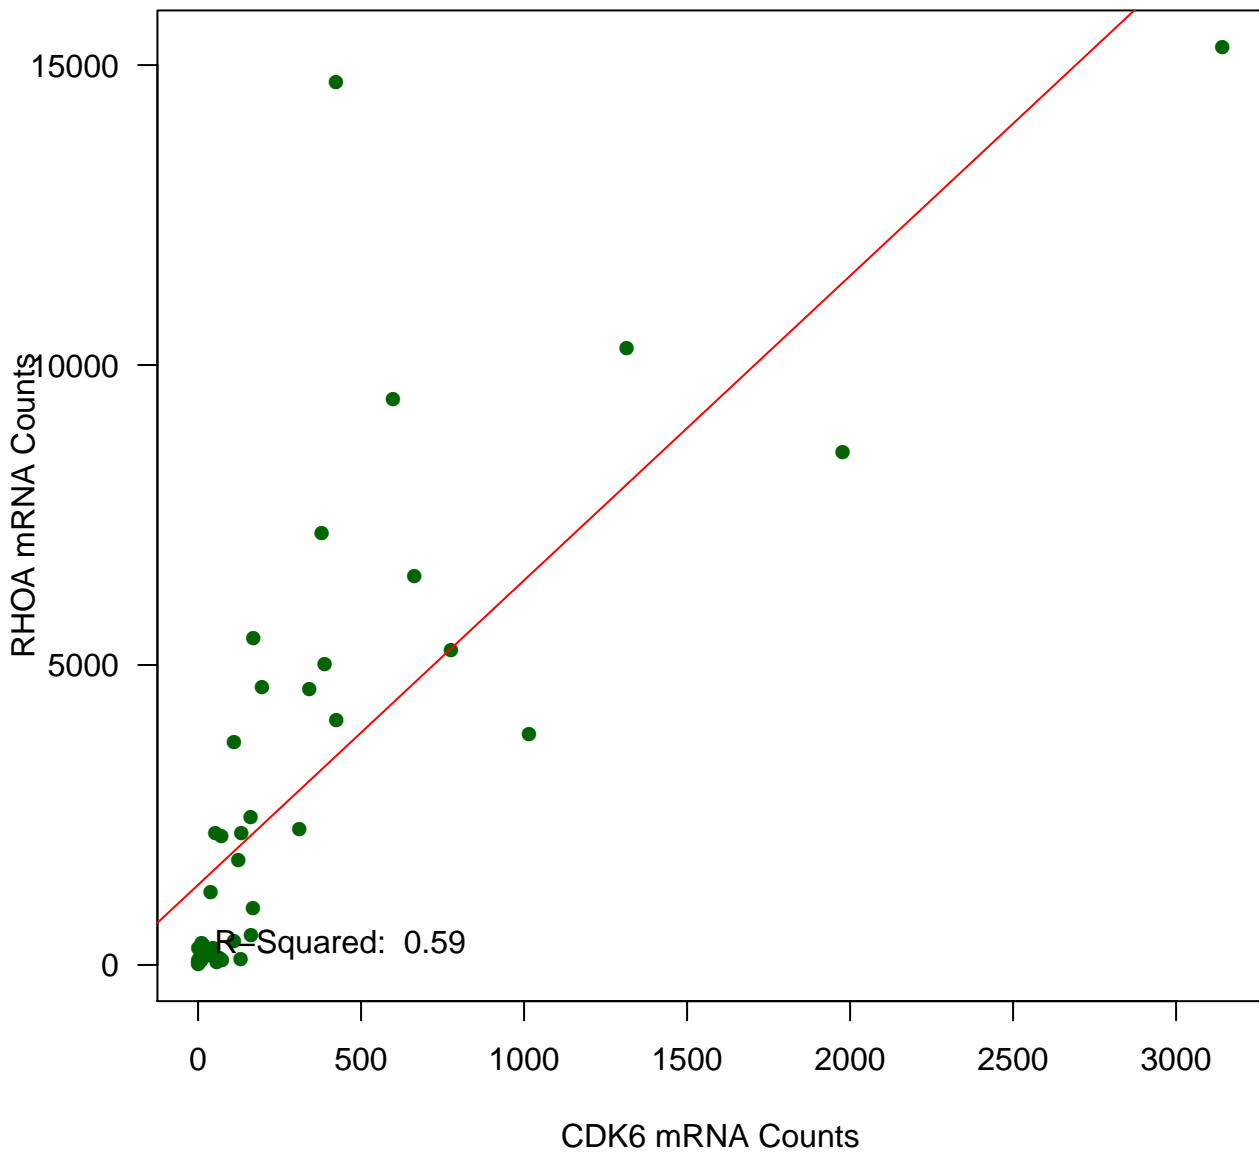

# TYMS mRNA Counts versus RHOA mRNA Counts

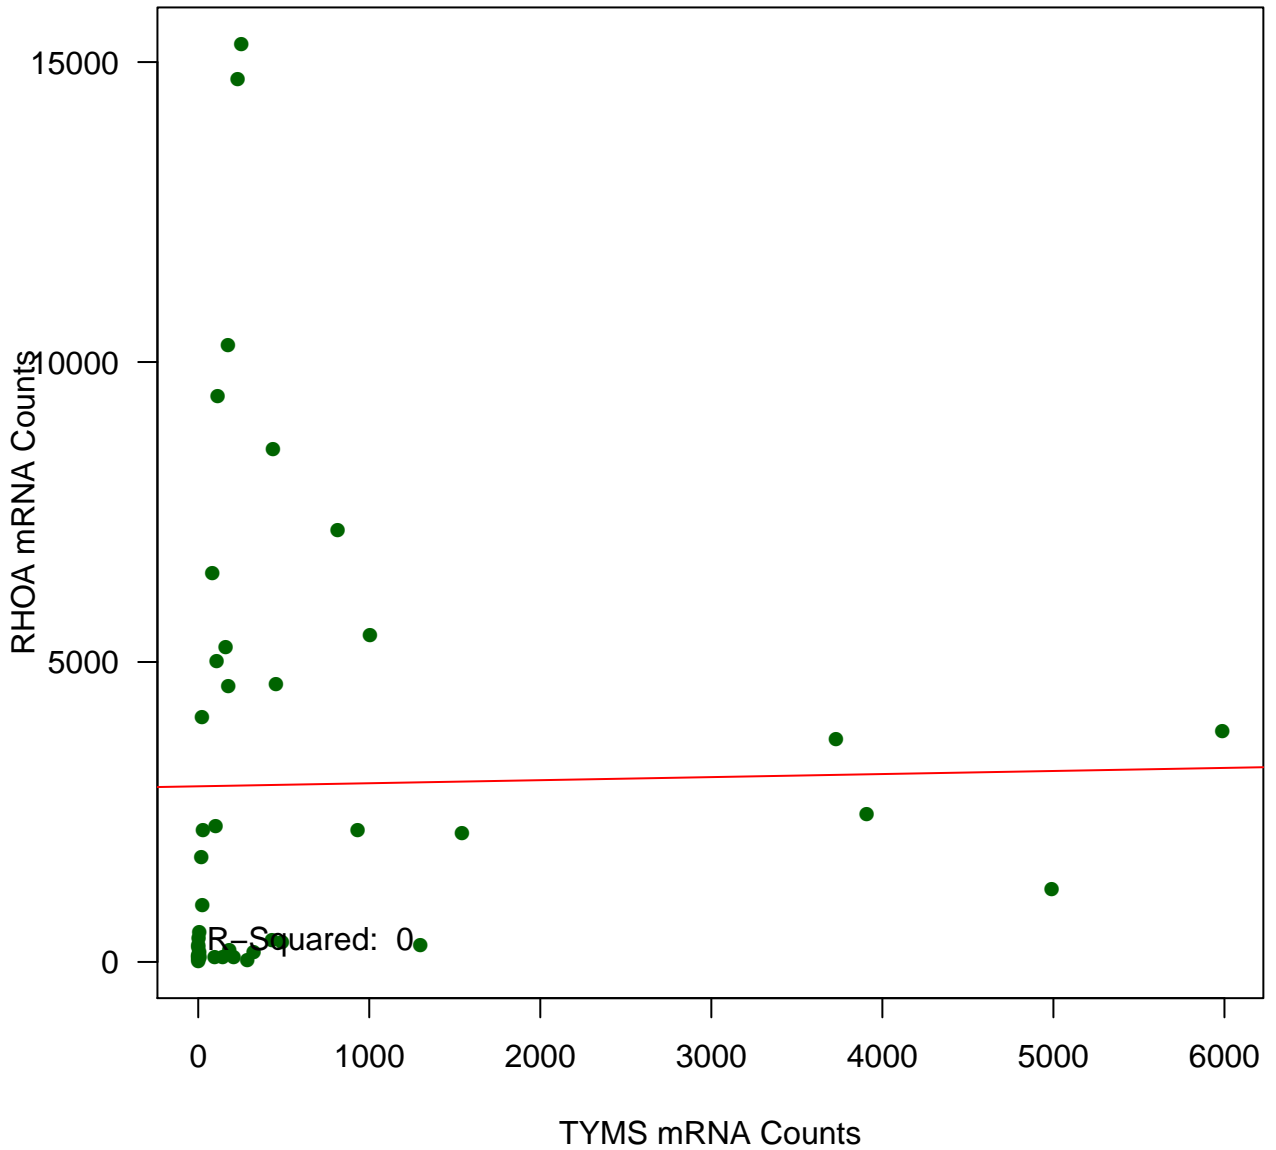

# CDK6 mRNA Counts versus SDCBP mRNA Counts

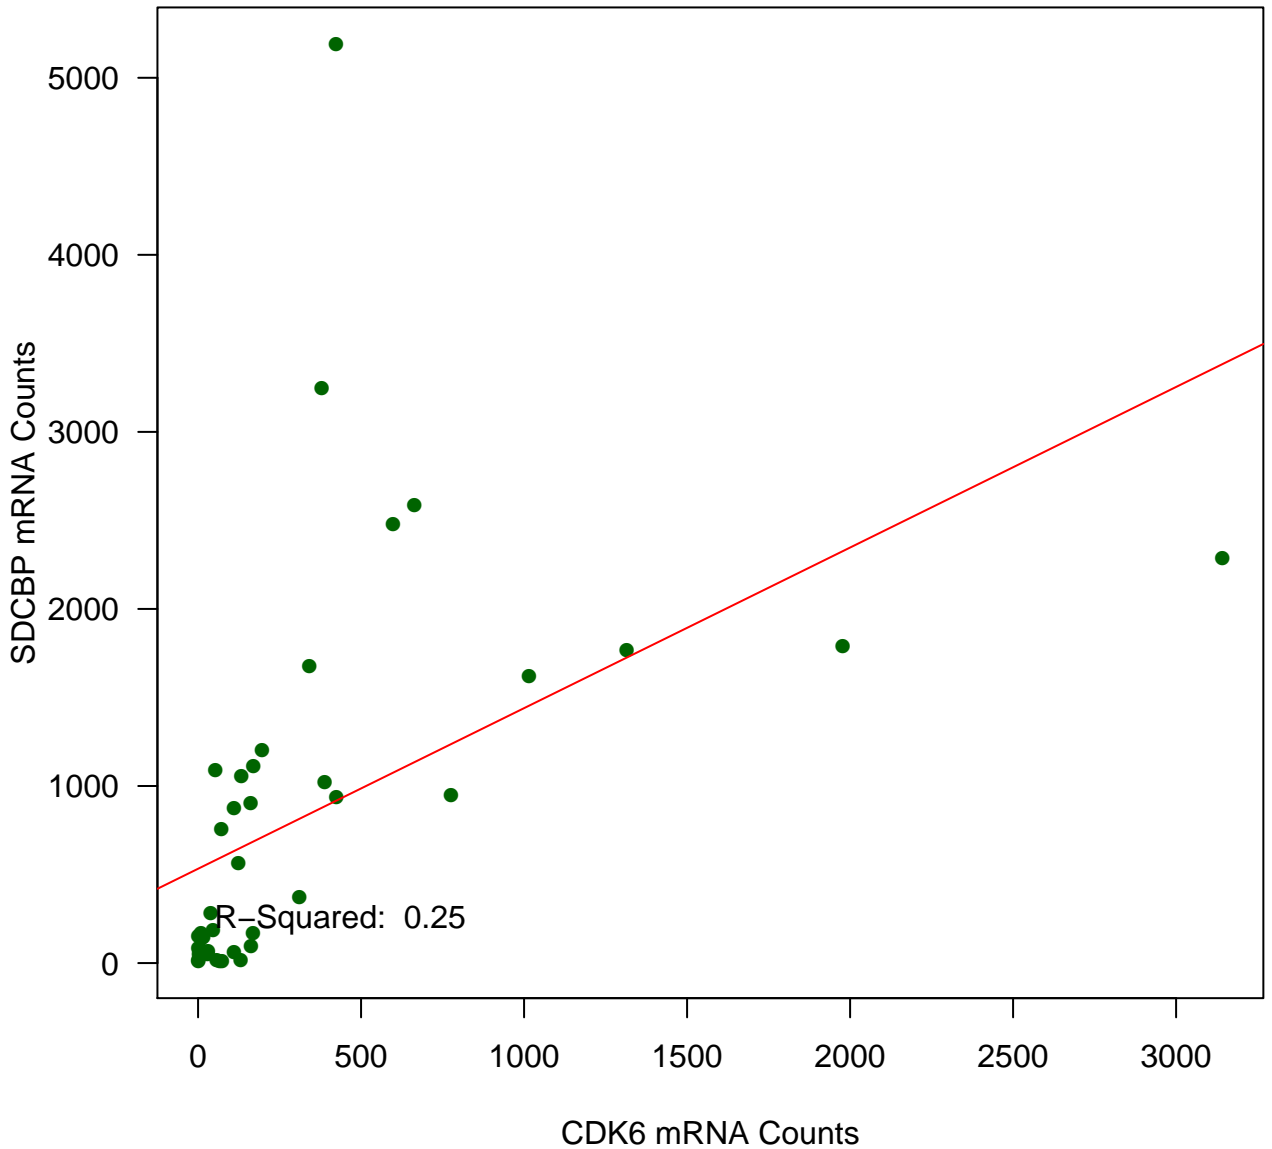

# TYMS mRNA Counts versus SDCBP mRNA Counts

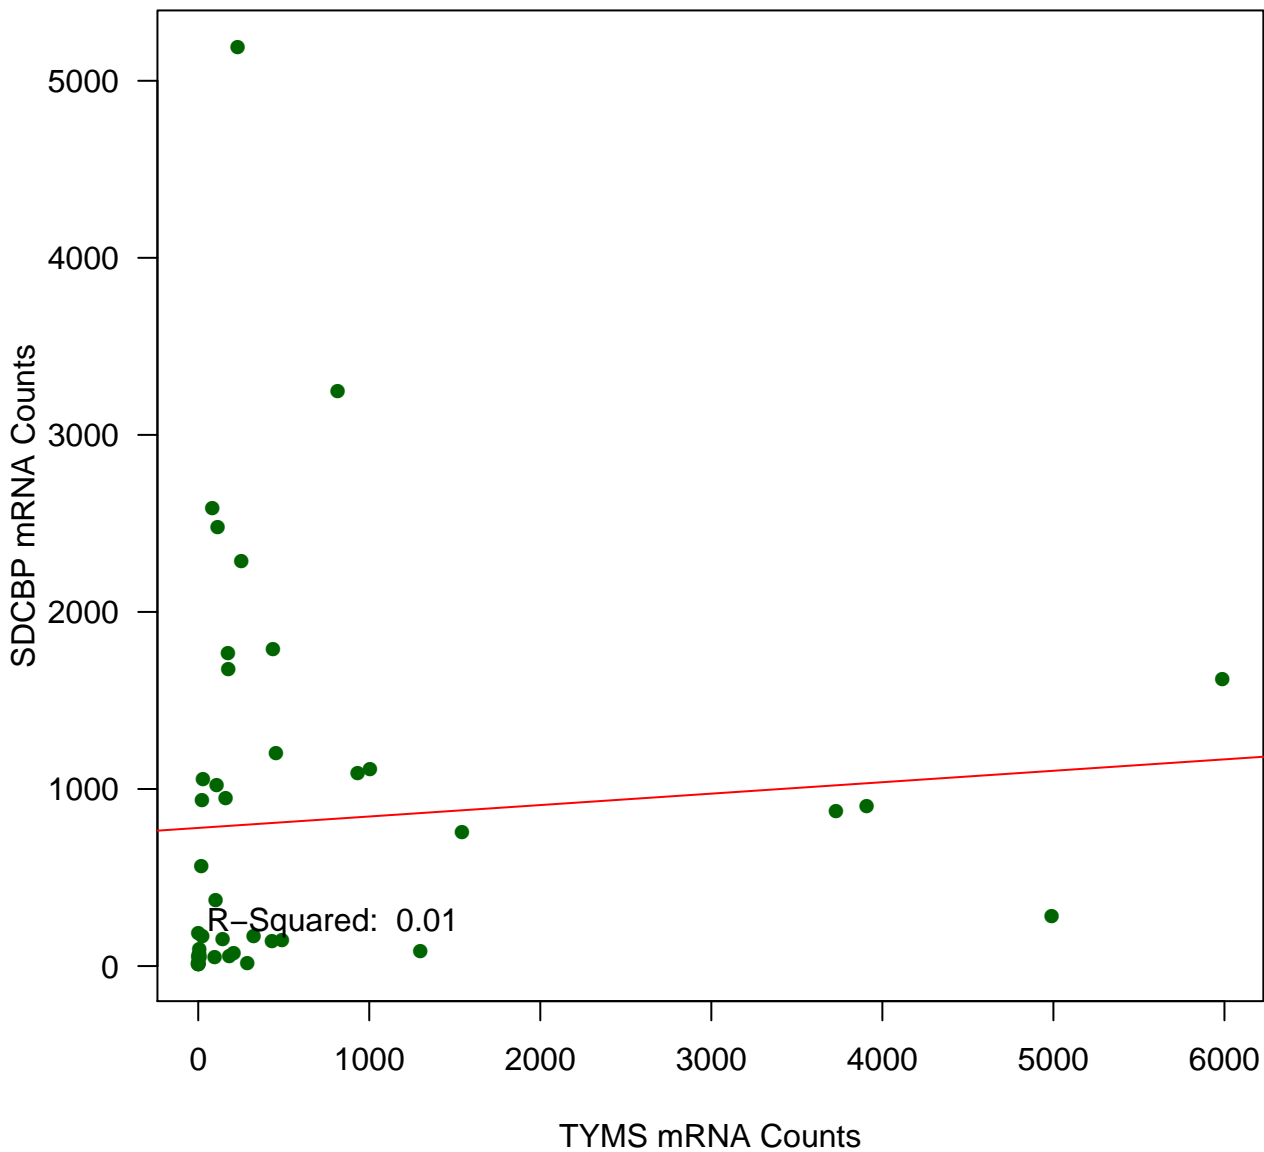

# TYMS mRNA Counts versus CDK6 mRNA Counts

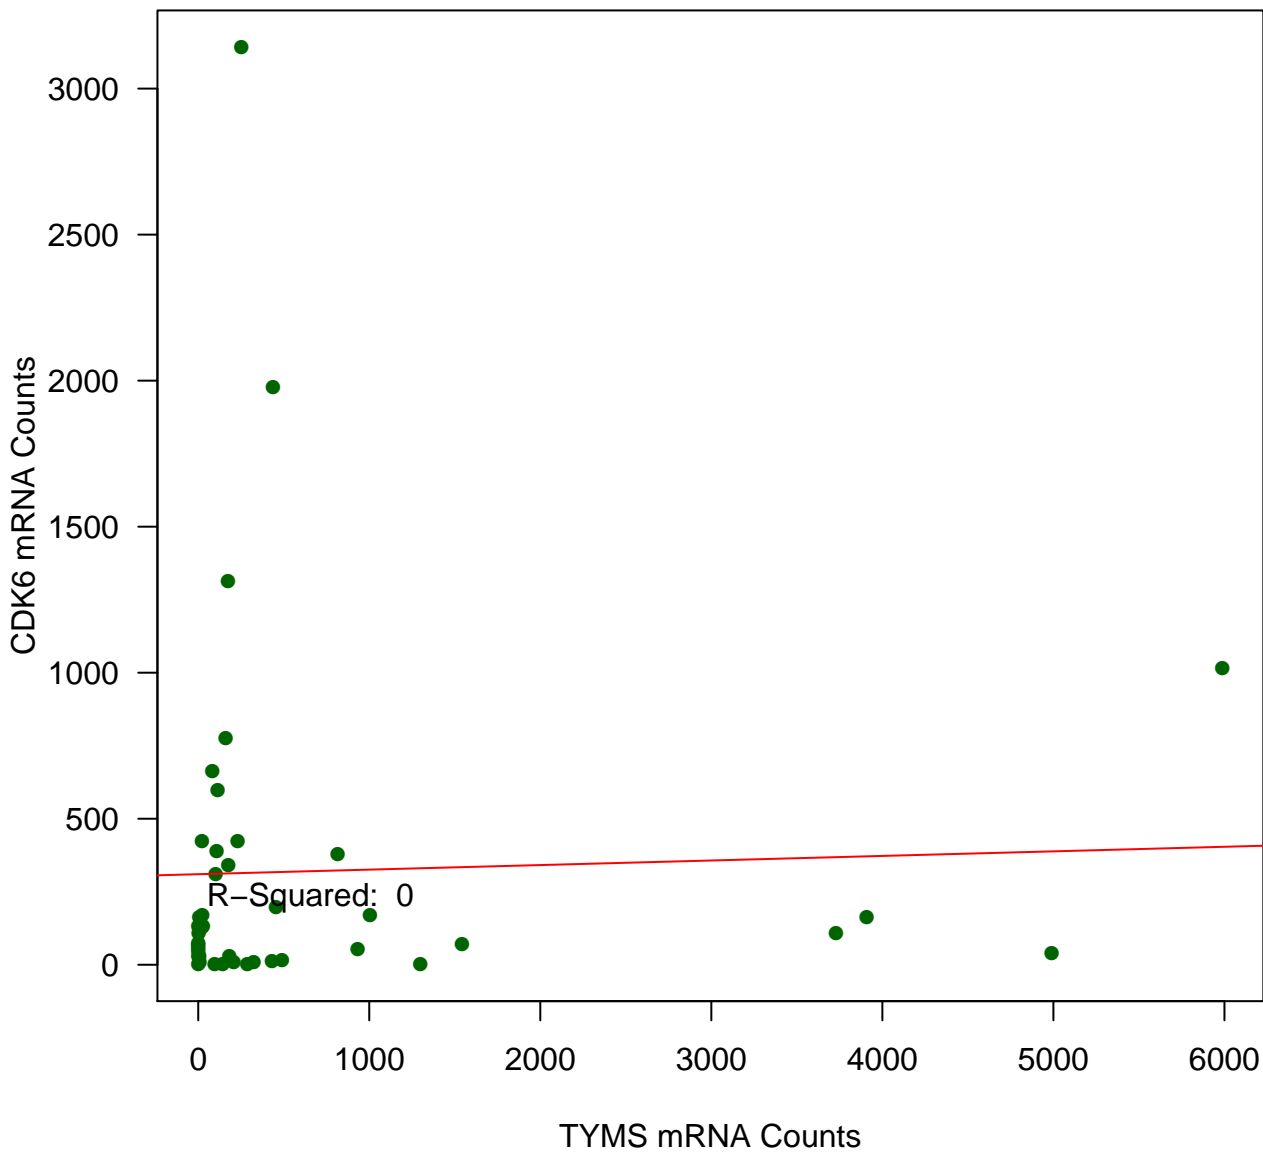

Supplement: pone.0165181.s002.pdf [file pone.0165181.s002.pdf]
